# Supplementary material
Source: publisher figshare collection journal article supplement (https://diabetesjournals.figshare.com/articles/dataset/_/21494751)
Supplement: Supplementary file 1 [file 1]

**Supplemental Figure 1**

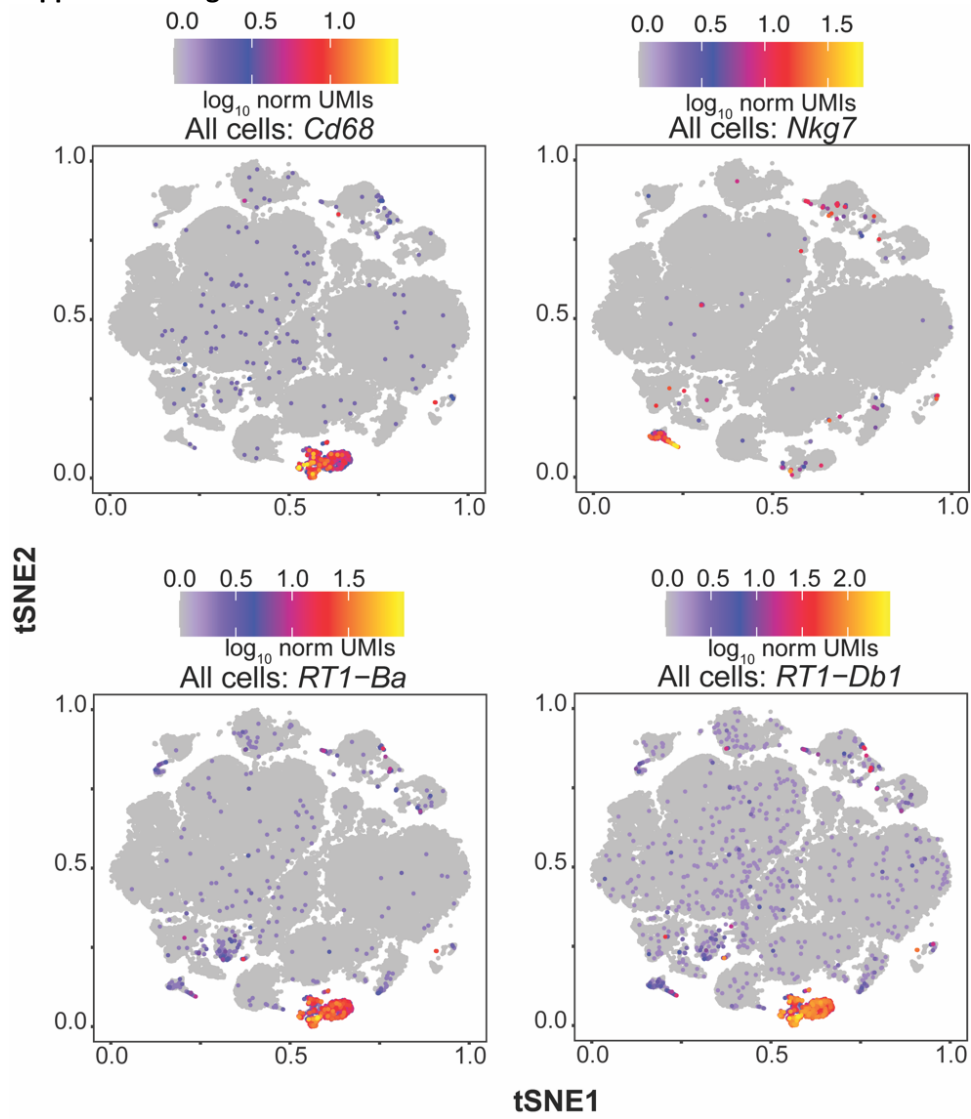

**Supplemental Figure 1. Select transcriptional markers assist in identifying cell clusters.** Example t-SNE maps show *Cd68* expression in the cluster identified as macrophages and *Nkg7* for the cluster identified as natural killer cells. t-SNE maps for *RT1-Ba* and *RT1-Db1* show that MHC class II transcripts are only found in the *Cd68*<sup>+</sup> cell cluster.

## Supplemental Figure 2

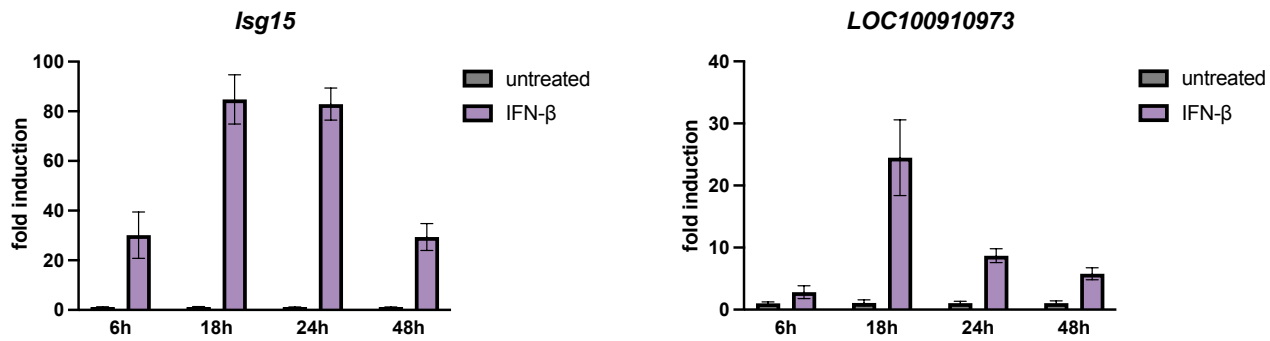

**Supplemental Figure 2. *LOC100910973* is induced by IFN- $\beta$ .** Normal rat kidney (NRK) cells (American Type Culture Collection, Cat #CRL-6509) were seeded at  $10^6$  cells per well in 6-well plates and stimulated with 1000 u/mL recombinant rat IFN- $\beta$  (PBL Assay Science, Cat# 13400-1) or media control at the indicated times. RNA was isolated from cells using TRIzol (Invitrogen, Cat #15596018) and stored at  $-80^\circ\text{C}$ . The QuantiTect Reverse Transcription Kit (Qiagen, Cat # 205311) was used for cDNA synthesis. mRNA expression levels of rat *LOC100910973* (sense 5'-CAAGTGGCTCTCAGAAAGTAGA-3', and antisense 5'-GCAGGGCTGAGCTAAAGAA-3') were measured using Applied Biosystems<sup>TM</sup> SYBR Green reagent (Thermo Fisher Scientific, Cat# 4309155); expression of rat *Isg15* and *Gusb* (housekeeping gene) was measured using Qiagen QuantiTect primers. Error bars represent the mean value for three independent wells per condition.

**Supplemental Figure 3**

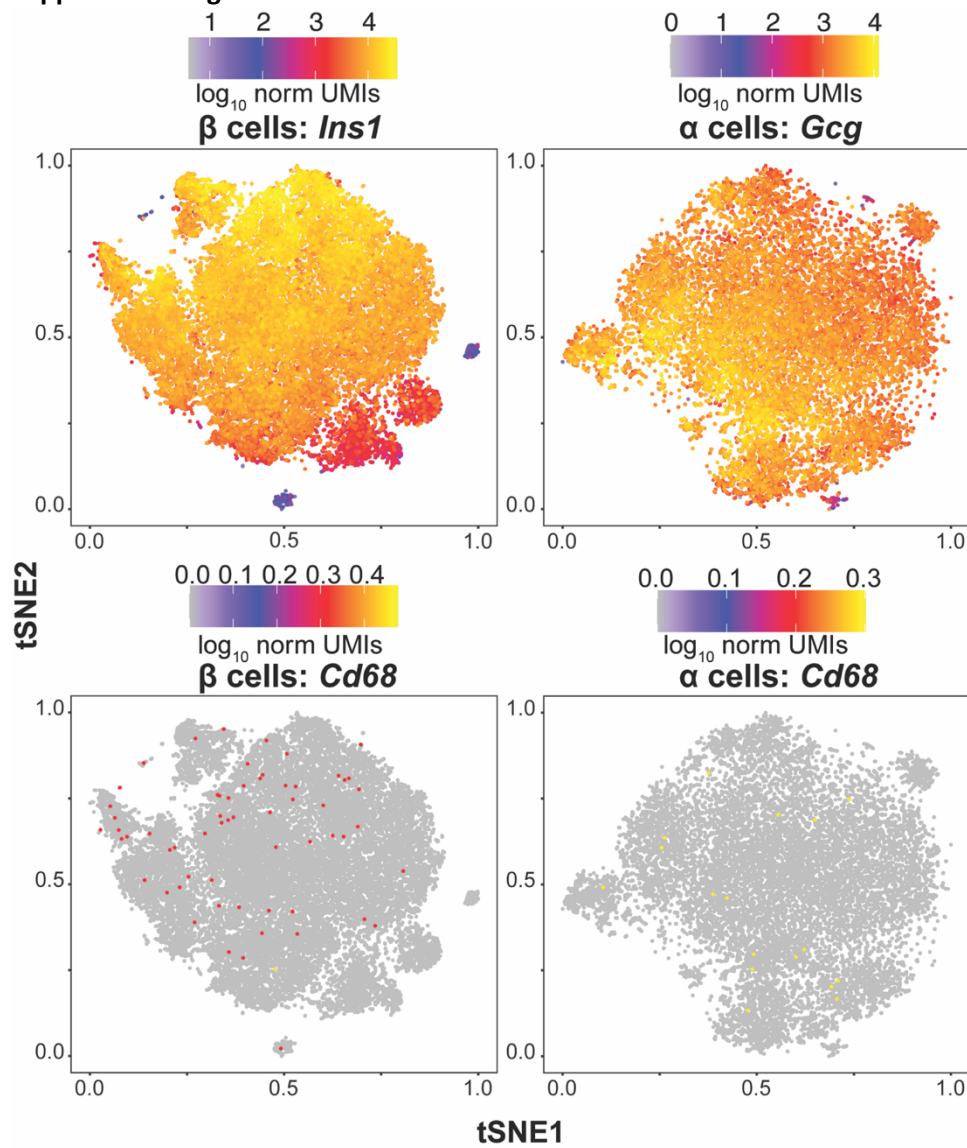

**Supplemental Figure 3. Cells identified as  $\beta$  and  $\alpha$  cells do not express *Cd68*<sup>+</sup>.** t-SNE plots for  $\beta$  and  $\alpha$  cell clusters confirm negligible levels of the macrophage marker *Cd68*<sup>+</sup> in these populations.

# Supplemental Figure 4

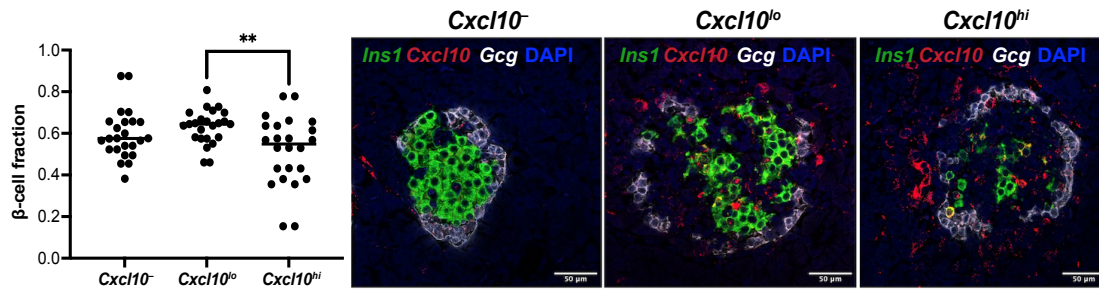

**Supplemental Figure 4. Occasional *Cxcl10*<sup>+</sup> islets show a selective loss of *Ins1*<sup>+</sup> cells.**  $\alpha$  and  $\beta$  cells were defined by *Gcg*<sup>+</sup> and *Ins1*<sup>+</sup> staining. Islets were categorized as *Cxcl10*<sup>-</sup> (no *Cxcl10*<sup>+</sup>), *Cxcl10*<sup>lo</sup> (1-25% *Cxcl10*<sup>+</sup>), or *Cxcl10*<sup>hi</sup> ( $\geq 25\%$  *Cxcl10*<sup>+</sup>). The fraction of  $\beta$  cells was calculated as  $\beta$  cells/ $\beta$  cells+ $\alpha$  cells from three *Cxcl10*<sup>-</sup>, three *Cxcl10*<sup>lo</sup>, and three *Cxcl10*<sup>hi</sup> islets from each of eight pIC+KRV-treated rats (day 11). CD8<sup>+</sup> islets were defined by the presence of at least three CD8<sup>+</sup> cells within the islet perimeter.

### Supplemental Figure 5

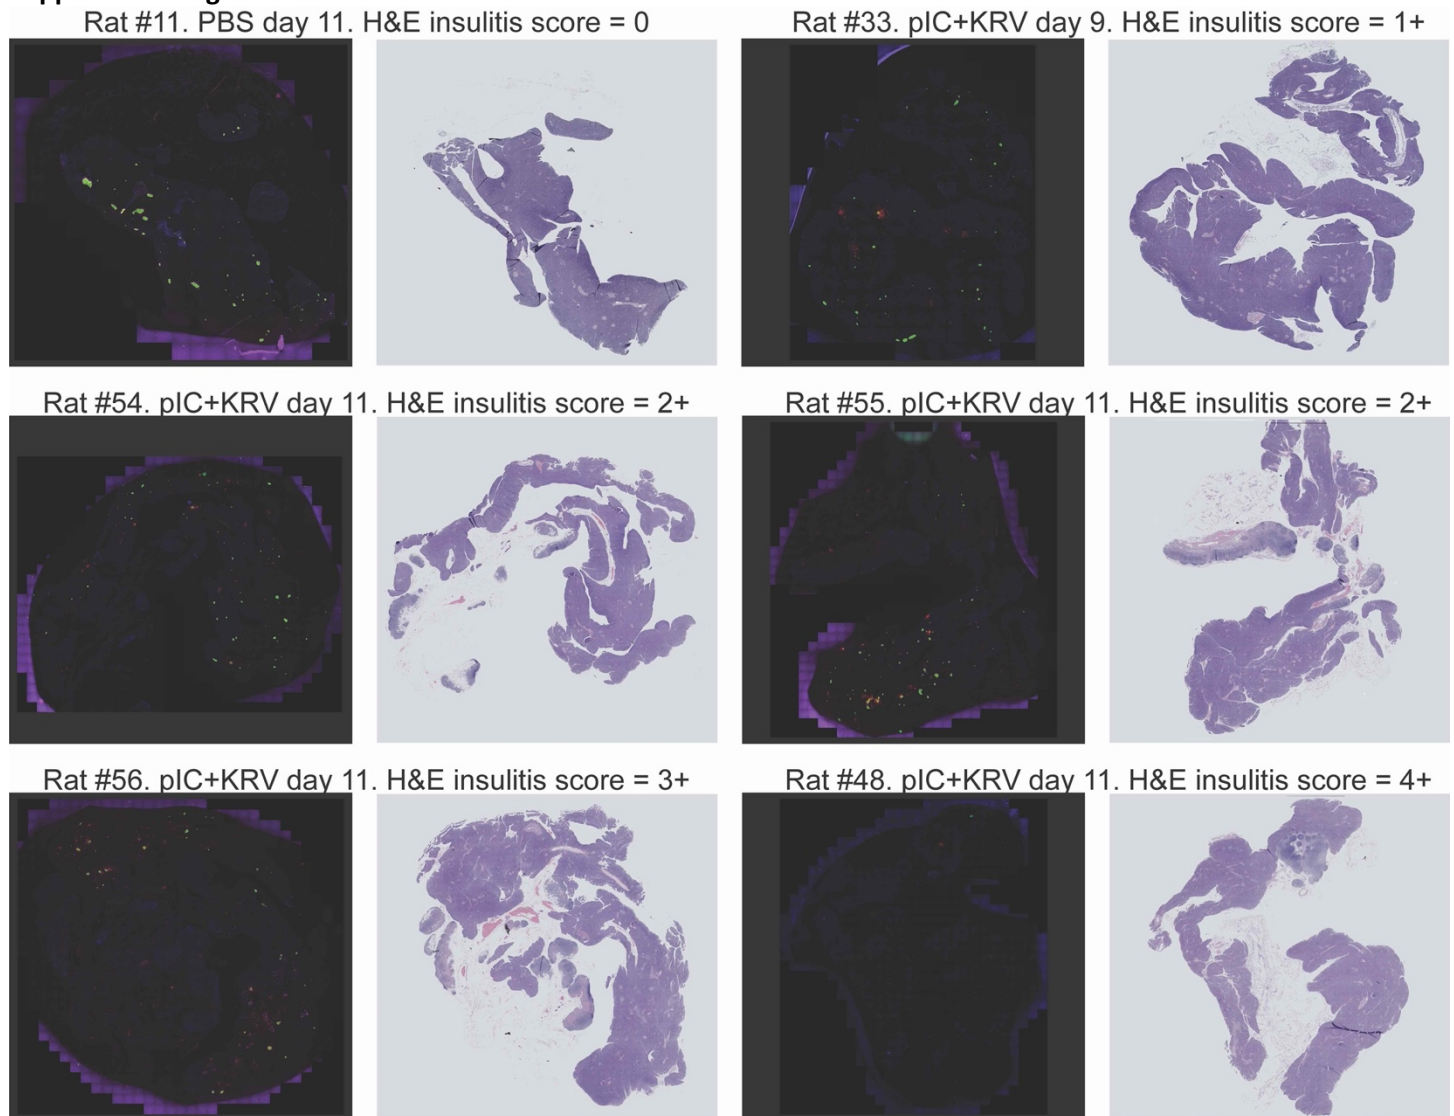

**Supplemental Figure 5. Representative sections from different rats show varying numbers of *Cxcl10*<sup>+</sup> islets.** Scanned sections of rat pancreata from various treatment conditions/times are shown. *Ins1*=green, *Gcg*=purple, *Cxcl10*=red, DAPI=blue. Corresponding insulitis scores from hematoxylin and eosin (H&E) staining are included. The purple border around each image is an outline drawn using a hydrophobic barrier pen (ImmEdge™ Hydrophobic Barrier Pen, Vector Laboratories, Inc., Newark, CA).

To access individual high-resolution images please go to:

[https://www.dropbox.com/sh/ba5eghjzm80g5di/AAA4G\\_AveV1RnPGVald9j6f9a?dl=0](https://www.dropbox.com/sh/ba5eghjzm80g5di/AAA4G_AveV1RnPGVald9j6f9a?dl=0)

**Supplemental Figure 6**

Rat #11. PBS day 11

Rat #56. pIC+KRV day 11

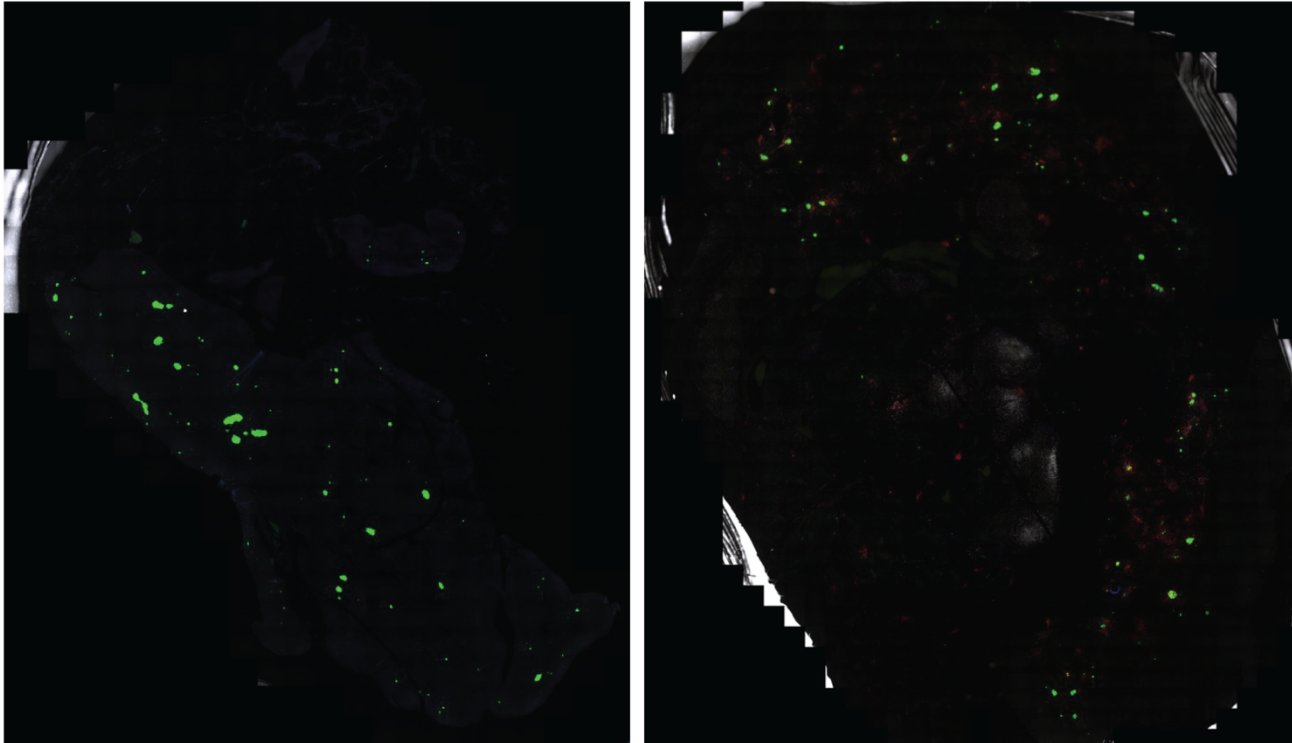

**Supplemental Figure 6. CD8<sup>+</sup> cells are absent in pancreata from PBS control rats.** Representative sections from different rats showing the absence of CD8<sup>+</sup> cells in the endocrine and exocrine pancreas from a control PBS rat and presence of CD8<sup>+</sup> cells in islets from a pIC+KRV-treated rat. CD8a=white, *Ins1*=green, *Cxcl10*=red, blue=DAPI.

To access individual high-resolution images please go to:

[https://www.dropbox.com/sh/shipnt1ab8w8hkp/AADSJ-U39PjnR\\_4HqHfLUCgva?dl=0](https://www.dropbox.com/sh/shipnt1ab8w8hkp/AADSJ-U39PjnR_4HqHfLUCgva?dl=0)
