# Supplementary material
Source: publisher figshare collection journal article supplement (https://diabetesjournals.figshare.com/articles/dataset/_/21494751)
Supplement: Supplementary file 2 [file 1]

The following is a sampling of the supplemental data. To access the full supplemental excel file, please use this link:

[https://www.dropbox.com/s/kn9a8u8e57qbyob/sample\\_Metadata\\_DE\\_GO\\_analysis\\_Derr%20et%20al%20Diabetes%20Sep%202022.xlsx?dl=0](https://www.dropbox.com/s/kn9a8u8e57qbyob/sample_Metadata_DE_GO_analysis_Derr%20et%20al%20Diabetes%20Sep%202022.xlsx?dl=0)

| Tab name/color                         | Contents                                                                                                  |
|----------------------------------------|-----------------------------------------------------------------------------------------------------------|
| <b>README</b>                          | Explanatory notes for differential expression (DE) and gene ontology (GO) analyses                        |
| <b>rats for 10X analysis</b>           | description of rats used for 10X single-cell RNA-Seq analysis                                             |
| <b>rats for histology and RNAscope</b> | description of rats used for histology and RNAscope analysis                                              |
| <b>cellCounts</b>                      | breakdown of cell counts by sample and test condition by cell type                                        |
| <b>beta</b>                            | DE analysis statistics of beta cells for all comparisons                                                  |
| <b>beta GO</b>                         | GO analysis of most significantly differentially expressed genes for beta cells                           |
| <b>hot betas</b>                       | DE and GO analysis of "hot" beta cells                                                                    |
| <b>alpha</b>                           | DE analysis statistics of alpha cells for all comparisons                                                 |
| <b>alpha GO</b>                        | GO analysis of most significantly differentially expressed genes for alpha cells                          |
| <b>hot alphas</b>                      | DE and GO analysis of "hot" alpha cells                                                                   |
| <b>macrophage</b>                      | DE analysis statistics of macrophage cluster for all comparisons                                          |
| <b>macrophage GO</b>                   | GO analysis of most significantly differentially expressed genes for macrophage cluster                   |
| <b>hot macrophages</b>                 | DE and GO analysis of "hot" macrophages and dendritic cells (DCs) and B cells from the macrophage cluster |
| <b>Tcell</b>                           | DE analysis statistics of T cells for all comparisons                                                     |
| <b>Tcell GO</b>                        | GO analysis of most significantly differentially expressed genes for T cells                              |
| <b>stellate</b>                        | DE analysis statistics of stellate cells for all comparisons                                              |
| <b>stellate GO</b>                     | GO analysis of most significantly differentially expressed genes for stellate cells                       |
| <b>delta</b>                           | DE analysis statistics of delta cells for all comparisons                                                 |
| <b>PP</b>                              | DE analysis statistics of PP (gamma) cells for all comparisons                                            |
| <b>vascular</b>                        | DE analysis statistics of vascular cells for all comparisons                                              |

## Explanatory notes for differential expression (DE) and gene ontology (GO) analyses:

### DE and GO analysis notes:

#### - Shorthand notation for the test conditions is as follows:

PBS11: PBS-only treatment, day 11 (control)  
pIC11: 3 x pIC injections on days -3, -2, and -1, day 11 (control)  
KRV11: 3 x pIC injections on days -3, -2, and -1, followed by KRV injection on day 0, study day 11  
KRV9: 3 x pIC injections on days -3, -2, and -1, followed by KRV injection on day 0, study day 9  
KRV7: 3 x pIC injections on days -3, -2, and -1, followed by KRV injection on day 0, study day 7

#### - Columns in the DE analyses:

LogFC: log2 fold-change, log (base 2) of the fold-change, where 1.0=2-fold, 2.0=4-fold, -1.0=0.5-fold, -2=0.25-fold, etc.  
LR: likelihood ratio, using the glmLRT() function in the R/Bioconductor edgeR package to compute the likelihood ratio test based on the generalized likelihood model.  
pAdj: p-value of the logFC, with Benjamini-Hochberg adjustment for multiple hypothesis testing

#### - Comparisons:

pIC11 vs PBS11: cells of the specified type from pIC11 vs PBS11 test conditions (controls). **Positive** logFC indicates higher expression in the **pIC11** condition  
KRV11 vs pIC11: cells of the specified type from KRV11 vs pIC11 test conditions. **Positive** logFC indicates higher expression in the **KRV11** condition  
KRV11 vs PBS11: cells of the specified type from KRV11 vs PBS11 test conditions. **Positive** logFC indicates higher expression in the **KRV11** condition  
KRV11 vs KRV9: cells of the specified type from KRV11 vs KRV9 test conditions. **Positive** logFC indicates higher expression in the **KRV11** condition  
KRV11 vs KRV7: cells of the specified type from KRV11 vs KRV7 test conditions. **Positive** logFC indicates higher expression in the **KRV11** condition  
KRV9 vs KRV7: cells of the specified type from KRV9 vs KRV7 test conditions. **Positive** logFC indicates higher expression in the **KRV9** condition  
hot vs cool KRV11: "hot" cells (shown in Figure 2A/2B) from the KRV11 test condition vs the other cells of the specified type (alpha or beta) from the KRV11 condition. **Positive** logFC indicates higher expression in the **"hot"** cells.  
hot vs nonKRV: "hot" cells (Figure 2A/2B) from the KRV11 test condition vs the other cells of the specified type (alpha or beta) from the PBS11 and pIC11 conditions. **Positive** logFC indicates higher expression in the **"hot"** cells.  
cool KRV11 vs nonKRV: cells **not** labeled as "hot" (Figure 2A/2B) from the KRV11 test condition vs the other cells of the specified type (alpha or beta) from the PBS11 and pIC11 conditions. **Positive** logFC indicates higher expression in the **"cool"** KRV11 cells.  
hot macrophages vs others...: "hot" macrophages (shown in Figure 3A) vs other cells from the macrophage cluster, with doublets, B cells and DCs removed, regardless of test condition. **Positive** logFC indicates higher expression in the **"hot" macrophages**.  
Dendritic cells vs others...: dendritic cells (DCs) (shown in Figure 3A) vs other cells from the macrophage cluster, with doublets, B cells and macrophages removed, regardless of test condition. **Positive** logFC indicates higher expression in **DCs**.  
B cells vs others...: B cells (shown in Figure 3A) vs other cells from the macrophage cluster, with doublets, macrophages and DCs removed, regardless of test condition. **Positive** logFC indicates higher expression in **B cells**.

#### GO analysis:

- All GO analysis was performed using the DAVID online tool (<https://david.ncifcrf.gov/tools.jsp>) to identify significantly enriched BP (biological process) categories.
- Results were considered significant if the *adjusted* p-value (Benjamini) was less than 5e-2 (0.05).
- All analyses used the gene list of highlighted genes (OFFICIAL\_GENE\_SYMBOL), using the *rattus norvegicus* background, and restricting the species to *rattus norvegicus*.
- GO analysis columns:
  - Term: GO BP pathway name
  - Count: number of genes in the list that are found in the pathway gene list
  - %: percent of genes in the list that are found in the pathway gene list
  - P-Value: p-value of the hypergeometric test using the provided gene list and the list of genes in the GO pathway
  - Benjamini: p-value adjusted for multiple hypothesis testing using the Benjamini-Hochberg method.

**Note:** for "hot" cell comparisons, DE results and GO category analysis are presented in the same tab.

### Alpha and beta cell analyses:

- Before doing any DE analysis, all cells identified as doublets were removed. The primary goal was to remove any endocrine cell doublets (alpha/beta, beta/delta, etc.), so a small number of doublets with non-endocrine cells (alpha/acinar, beta/ductal, etc.) may be included in any of these populations.
- Endocrine doublets were identified as cells with high expression of more than one of the cell-type-specific marker genes - *Gcg* for alpha cells, *Ins1/Ins2* for beta cells, *Sst* for delta cells, *Ppy* for PP cells, and *Ghr1* for epsilon cells. Cells that contain more than a threshold number of transcripts of more than one marker gene are considered doublets. Cells with high expression of both *Ins1/Ins2* and *Gcg* are specifically labeled 'ab-doublets' (alpha/beta doublets).

### General Notes:

- *LOC100911498* is an X-linked ncRNA similar to *XIST* in humans. Its high rank in the DE gene lists for some of the comparisons is presumably due to the fact that female rats were only included in the KRV7, KRV9, and KRV11 conditions, whereas all rats in the control conditions (PBS11 and pIC11) were male. This should be considered an artifact, and is highlighted in yellow in the gene lists.
- The genes that were selected for GO biological process (BP) analysis are highlighted either in green (for upregulated genes) or pink (for downregulated genes).
- Light green highlighting indicates that the logFC threshold for gene selection for GO analysis was set to 1.0 (2-fold). Dark green highlighting indicates that the threshold was set to 2.0 (4-fold) to reduce the length of the selected gene list and identify only the most highly significant GO categories.
- delta, PP, and vascular cell DE results are included for completeness, but no GO analysis was performed for these cell types.

| Treatment     | Day of harvest | Induction date | Rat # / Sex | Sequencing ID |
|---------------|----------------|----------------|-------------|---------------|
| pIC (control) | 11             | 5/26/21        | #2 - M      | AA2           |
|               |                | 5/26/21        | #3 - M      | AA3           |
| PBS (control) | 11             | 5/29/21        | #7 - M      | AA7           |
|               |                | 5/29/21        | #8 - M      | AA8           |
| pIC+KRV       | 7              | 7/5/21         | #18 - M     | AA18          |
|               |                | 7/5/21         | #19 - F     | AA19          |
| pIC+KRV       | 9              | 7/5/21         | #21 - F     | AA21          |
|               |                | 7/5/21         | #22 - M     | AA22          |
| pIC+KRV       | 11             | 6/13/21        | #15 - F     | AA15          |
|               |                | 6/13/21        | #17 - F     | AA17          |

| # cells | #reads/cell | UMI/cell | genes/cell |
|---------|-------------|----------|------------|
| 8000    | 22.7k       | 12533.6  | 1357.8     |
| 6827    | 25.4k       |          |            |
| 5303    | 19.0k       | 10299.1  | 1291.4     |
| 7823    | 20.0k       |          |            |
| 5652    | 28.8k       | 13860.9  | 1433.8     |
| 6052    | 27.7k       |          |            |
| 7078    | 26.9k       | 12347    | 1571.6     |
| 5082    | 27.5k       |          |            |
| 6462    | 24.7k       | 11894.8  | 1684.3     |
| 3323    | 25.5k       |          |            |

|               | Day of harvest | Induction date | Rat # / Sex | Insulinitis score | Used for RNA-ISH image analysis |
|---------------|----------------|----------------|-------------|-------------------|---------------------------------|
| pIC (control) | 11             | 5/26/21        | #4 - F      | 0                 | No                              |
|               |                | 5/26/21        | #5 - F      | 0                 | No                              |
|               |                | 5/26/21        | #6 - F      | 0                 | No                              |
| PBS (control) | 7              | 1/20/22        | #60 - M     | 0                 | Yes                             |
|               |                | 1/20/22        | #61 - M     | 0                 | Yes                             |
|               |                | 1/20/22        | #62 - M     | 0                 | Yes                             |
| PBS (control) | 9              | 1/20/22        | #57 - M     | 0                 | No                              |
|               |                | 1/20/22        | #58 - M     | 0                 | No                              |
|               |                | 1/20/22        | #59 - M     | 0                 | No                              |
| PBS (control) | 11             | 5/29/21        | #11 - F     | 0                 | Yes                             |
|               |                | 5/29/21        | #12 - F     | 0                 | Yes                             |
|               |                | 5/29/21        | #13 - F     | 0                 | Yes                             |
| pIC+KRV       | 5              | 8/15/22        | #66 - M     | 0                 | No                              |
|               |                | 8/15/22        | #67 - M     | 0                 | No                              |
|               |                | 8/15/22        | #68 - F     | 0                 | No                              |
| pIC+KRV       | 7              | 7/5/21         | #28 - M     | 0                 | No                              |
|               |                | 7/5/21         | #29 - F     | 1                 | No                              |
|               |                | 7/5/21         | #30 - F     | 1                 | No                              |
| pIC+KRV       | 9              | 7/5/21         | #31 - M     | 0                 | No                              |
|               |                | 7/5/21         | #32 - F     | 2                 | No                              |
|               |                | 7/5/21         | #33 - F     | 1                 | No                              |
|               |                | 11/6/21        | #37 - M     | 1                 | Yes                             |
|               |                | 11/6/21        | #38 - M     | 1                 | Yes                             |
|               |                | 11/6/21        | #39 - F     | 2                 | Yes                             |
|               |                | 11/6/21        | #40 - F     | 1                 | No                              |
|               |                | 11/12/21       | #41 - M     | 1                 | Yes                             |
|               |                | 11/12/21       | #42 - M     | 1                 | Yes                             |
|               |                | 11/12/21       | #43 - M     | 1                 | Yes                             |
|               |                | 11/12/21       | #44 - M     | 1                 | Yes                             |
|               |                | 11/12/21       | #45 - M     | 2                 | Yes                             |
|               |                | 11/12/21       | #46 - F     | 2                 | Yes                             |
| pIC+KRV       | 11             | 6/13/21        | #23 - M     | 4                 | No                              |
|               |                | 6/13/21        | #24 - M     | 1                 | No                              |
|               |                | 6/13/21        | #25 - M     | 0                 | No                              |
|               |                | 6/13/21        | #26 - M     | 1                 | No                              |
|               |                | 6/13/21        | #47 - M     | 2                 | Yes                             |
|               |                | 11/6/21        | #48 - M     | 4                 | No                              |
|               |                | 11/6/21        | #49 - M     | 4                 | Yes                             |
|               |                | 11/6/21        | #50 - F     | 1                 | No                              |
|               |                | 11/6/21        | #51 - M     | 3                 | Yes                             |
|               |                | 11/12/21       | #52 - M     | 2                 | Yes                             |
|               |                | 11/12/21       | #53 - M     | 4                 | No                              |
|               |                | 11/12/21       | #54 - M     | 2                 | Yes                             |
|               |                | 11/12/21       | #55 - M     | 2                 | Yes                             |
|               |                | 11/12/21       | #56 - F     | 3                 | Yes                             |

| PBS, Day11 |      | pIC, Day11 |      | pIC+KRV, Day7 |      | pIC+KRV, Day9 |      | pIC+KRV, Day11 |      |            |       | PBS, Day11 |       | pIC, Day11 |       | pIC+KRV, Day7 |       | pIC+KRV, Day9 |       | pIC+KRV, Day11 |       |
|------------|------|------------|------|---------------|------|---------------|------|----------------|------|------------|-------|------------|-------|------------|-------|---------------|-------|---------------|-------|----------------|-------|
| AA7        | AA8  | AA2        | AA3  | AA18          | AA19 | AA21          | AA22 | AA15           | AA17 |            |       | AA7        | AA8   | AA2        | AA3   | AA18          | AA19  | AA21          | AA22  | AA15           | AA17  |
| 846        | 1625 | 2328       | 1728 | 1663          | 1659 | 2148          | 1366 | 2114           | 805  |            |       | alpha      | 16.0% | 20.8%      | 29.1% | 25.3%         | 29.4% | 27.0%         | 30.3% | 26.9%          | 32.7% |
| 2263       | 3207 | 3673       | 3580 | 2470          | 2866 | 2745          | 2030 | 2539           | 1571 | beta       | 42.8% | 41.0%      | 45.9% | 52.4%      | 43.7% | 46.7%         | 38.8% | 39.9%         | 39.3% | 47.3%          |       |
| 83         | 122  | 89         | 100  | 83            | 93   | 130           | 97   | 130            | 60   | delta      | 1.6%  | 1.6%       | 1.1%  | 1.5%       | 1.5%  | 1.5%          | 1.8%  | 1.9%          | 2.0%  | 1.8%           |       |
| 123        | 236  | 144        | 275  | 187           | 227  | 174           | 250  | 206            | 44   | PP         | 2.3%  | 3.0%       | 1.8%  | 4.0%       | 3.3%  | 3.7%          | 2.5%  | 4.9%          | 3.2%  | 1.3%           |       |
| 2          | 0    | 0          | 2    | 2             | 1    | 3             | 4    | 1              | 0    | epsilon    | 0.04% | 0%         | 0%    | 0.03%      | 0.04% | 0.02%         | 0.04% | 0.08%         | 0.02% | 0%             |       |
| 852        | 1045 | 534        | 236  | 228           | 237  | 279           | 188  | 238            | 132  | ab_doub    | 16.1% | 13.4%      | 6.7%  | 3.5%       | 4.0%  | 3.9%          | 3.9%  | 3.7%          | 3.7%  | 4.0%           |       |
| 768        | 863  | 811        | 633  | 521           | 633  | 676           | 482  | 502            | 228  | doublet    | 14.5% | 11.0%      | 10.1% | 9.3%       | 9.2%  | 10.3%         | 9.6%  | 9.5%          | 7.8%  | 6.9%           |       |
| 0          | 0    | 0          | 0    | 17            | 17   | 52            | 50   | 111            | 113  | Tcell      | 0%    | 0%         | 0%    | 0%         | 0.3%  | 0.3%          | 0.7%  | 1.0%          | 1.7%  | 3.4%           |       |
| 52         | 166  | 149        | 48   | 105           | 102  | 160           | 117  | 194            | 121  | macrophage | 1.0%  | 2.1%       | 1.9%  | 0.7%       | 1.9%  | 1.7%          | 2.3%  | 2.3%          | 3.0%  | 3.6%           |       |
| 61         | 117  | 75         | 60   | 132           | 95   | 296           | 210  | 154            | 93   | stellate   | 1.2%  | 1.5%       | 0.9%  | 0.9%       | 2.3%  | 1.5%          | 4.2%  | 4.1%          | 2.4%  | 2.8%           |       |
| 196        | 329  | 155        | 136  | 209           | 181  | 314           | 232  | 255            | 142  | vascular   | 3.7%  | 4.2%       | 1.9%  | 2.0%       | 3.7%  | 2.9%          | 4.4%  | 4.6%          | 3.9%  | 4.3%           |       |
| 27         | 73   | 42         | 29   | 35            | 31   | 44            | 56   | 18             | 14   | RBC        | 0.5%  | 0.9%       | 0.5%  | 0.4%       | 0.6%  | 0.5%          | 0.6%  | 1.1%          | 0.3%  | 0.4%           |       |
| 10         | 40   | 0          | 0    | 0             | 0    | 57            | 0    | 0              | 0    | NK         | 0.2%  | 0.5%       | 0%    | 0%         | 0%    | 0%            | 0.8%  | 0%            | 0%    | 0%             |       |
| 5283       | 7823 | 8000       | 6827 | 5652          | 6142 | 7078          | 5082 | 6462           | 3323 |            |       |            |       |            |       |               |       |               |       |                |       |

ion:

| PBS, Day11 | pIC, Day11 | pIC+KRV, Day7 | pIC+KRV, Day9 | pIC+KRV, Day11 | PBS, Day11 | pIC, Day11 | pIC+KRV, Day7 | pIC+KRV, Day9 | pIC+KRV, Day11 |
|------------|------------|---------------|---------------|----------------|------------|------------|---------------|---------------|----------------|
| 2471       | 4056       | 3322          | 3514          | 2919           | alpha      | 18.9%      | 27.4%         | 28.2%         | 28.9%          |
| 5470       | 7253       | 5336          | 4775          | 4110           | beta       | 41.7%      | 48.9%         | 45.2%         | 39.3%          |
| 205        | 189        | 176           | 227           | 190            | delta      | 1.6%       | 1.3%          | 1.5%          | 1.9%           |
| 359        | 419        | 414           | 424           | 250            | PP         | 2.7%       | 2.8%          | 3.5%          | 3.5%           |
| 2          | 2          | 3             | 7             | 1              | epsilon    | 0.02%      | 0.01%         | 0.03%         | 0.06%          |
| 1897       | 770        | 465           | 467           | 370            | ab_doub    | 14.5%      | 5.2%          | 3.9%          | 3.8%           |
| 1631       | 1444       | 1154          | 1158          | 730            | doublet    | 12.4%      | 9.7%          | 9.8%          | 9.5%           |
| 0          | 0          | 34            | 102           | 224            | Tcell      | 0.0%       | 0.0%          | 0.3%          | 0.8%           |
| 218        | 197        | 207           | 277           | 315            | macrophage | 1.7%       | 1.3%          | 1.8%          | 2.3%           |
| 178        | 135        | 227           | 506           | 247            | stellate   | 1.4%       | 0.9%          | 1.9%          | 4.2%           |
| 525        | 291        | 390           | 546           | 397            | vascular   | 4.0%       | 2.0%          | 3.3%          | 4.5%           |
| 100        | 71         | 66            | 100           | 32             | RBC        | 0.8%       | 0.5%          | 0.6%          | 0.8%           |
| 50         | 0          | 0             | 57            | 0              | NK         | 0.4%       | 0.0%          | 0.0%          | 0.5%           |
| 13106      | 14827      | 11794         | 12160         | 9785           |            |            |               |               |                |

| PBS, Day11 | pIC, Day11 | pIC+KRV, Day7 | pIC+KRV, Day9 | pIC+KRV, Day11 | PBS, Day11 | pIC, Day11   | pIC+KRV, Day7 | pIC+KRV, Day9   | pIC+KRV, Day11 |
|------------|------------|---------------|---------------|----------------|------------|--------------|---------------|-----------------|----------------|
| 0          | 0          | 4             | 48            | 624            | hot' beta  | 0% of betas  | 0% of betas   | 0.075% of betas | 1.0% of betas  |
| 0          | 0          | 5             | 52            | 591            | hot' alpha | 0% of all    | 0% of all     | 0.034% of all   | 0.39% of all   |
|            |            |               |               |                |            | 0% of alphas | 0% of alphas  | 0.15% of alphas | 1.5% of alphas |
|            |            |               |               |                |            | 0% of all    | 0% of all     | 0.059% of all   | 0.4% of all    |

| piC11 vs PBS11 | logFC    | LR       | pAdj      |  | KRV11 vs piC11 | logFC    | LR        | pAdj                  |  | KRV11 vs PBS11 | logFC    | LR       | pAdj      |  | KRV11 vs KRV9 | logFC    | LR       | pAdj      |  | KRV11 vs KRV7 | logFC    | LR       | pAdj      |  | KRV9 vs KRV7 | logFC    | LR       | pAdj      |  |
|----------------|----------|----------|-----------|--|----------------|----------|-----------|-----------------------|--|----------------|----------|----------|-----------|--|---------------|----------|----------|-----------|--|---------------|----------|----------|-----------|--|--------------|----------|----------|-----------|--|
| Gcg            | 1.578259 | 2094.417 | 0         |  | Ubd            | 5.503695 | 1553.071  | 0                     |  | Ubd            | 5.527755 | 1368.713 | 1.51E-297 |  | Ubd           | 4.361588 | 420.3177 | 2.53E-91  |  | Ubd           | 5.59129  | 1223.103 | 1.16E-265 |  | Ubd          | 1.456509 | 697.3728 | 7.94E-151 |  |
| B2m            | 0.686783 | 1008.266 | 9.54E-218 |  | LOC100911498   | 4.932438 | 24035.43  | 0                     |  | Cxc10          | 4.929048 | 1102.602 | 7.66E-240 |  | Cxc10         | 3.908478 | 444.7473 | 1.34E-96  |  | Cxc10         | 4.974539 | 1002.198 | 8.53E-218 |  | Mcpt111      | 1.40136  | 272.4414 | 6.63E-59  |  |
| Myf6l          | 0.644365 | 619.7096 | 5.48E-134 |  | Cxc10          | 4.828847 | 1323.739  | 1.14E-287             |  | LOC100911498   | 4.878755 | 18165.42 | 0         |  | LOC100910973  | 3.483036 | 683.496  | 2.72E-148 |  | LOC100910973  | 3.935337 | 1040.355 | 4.63E-226 |  | Cma1         | 1.310553 | 262.2275 | 1.03E-56  |  |
| RT1-CE10       | 0.628078 | 306.492  | 1.84E-65  |  | LOC100910973   | 4.266377 | 2031.961  | 0                     |  | Cxc11          | 4.134472 | 1398.238 | 6.33E-304 |  | Cxc11         | 3.209971 | 876.4321 | 5.07E-190 |  | Cxc11         | 3.639312 | 1344.106 | 6.65E-292 |  | Ubd          | 1.259375 | 134.503  | 3.17E-29  |  |
| Gast           | 0.617399 | 81.49097 | 6.25E-18  |  | Igk15          | 3.38951  | 1664.898  | 0                     |  | Cxc11          | 3.79154  | 1419.994 | 0.00E-000 |  | Igk15         | 3.109892 | 839.0305 | 6.31E-182 |  | Igk15         | 3.169838 | 1045.845 | 3.00E-227 |  | Cxc10        | 1.098889 | 64.54498 | 2.80E-14  |  |
| Rpl13a         | 0.544321 | 1147.731 | 6.20E-248 |  | Cxc11          | 3.3791   | 1699.483  | 0                     |  | B2m            | 2.950349 | 6911.557 | 0         |  | Prsr1         | 2.529175 | 557.0069 | 6.74E-121 |  | Prsr1         | 2.605519 | 1221.136 | 3.01E-265 |  | Cpa3         | 0.799449 | 196.6294 | 1.42E-42  |  |
| Kik1b3a        | 0.521538 | 221.1804 | 1.56E-48  |  | Psmb8          | 2.642684 | 1935.168  | 0                     |  | Psmb8          | 2.652346 | 675.3126 | 1.61E-146 |  | MGC108823     | 2.54387  | 1548.075 | 0         |  | MGC108823     | 2.54387  | 1548.075 | 0         |  | Pc10         | 0.618991 | 404.0592 | 3.84E-95  |  |
| RT1-CE10       | 0.505519 | 217.0312 | 4.02E-47  |  | RT1-CE5        | 2.600619 | 3705.356  | 0                     |  | RT1-CE5        | 2.616782 | 2983.169 | 0         |  | Ctrb1         | 2.267988 | 373.1915 | 3.92E-81  |  | Ctrb1         | 2.409522 | 1261.694 | 5.14E-274 |  | LOC100362110 | 0.543569 | 336.4221 | 1.06E-72  |  |
| Pagr1          | 0.499977 | 192.2824 | 9.02E-42  |  | MGC108823      | 2.593147 | 1732.208  | 0                     |  | Psmb9          | 2.591771 | 1670.31  | 0         |  | Gbp2          | 2.256555 | 730.338  | 1.62E-80  |  | Gbp2          | 2.350897 | 585.7908 | 1.58E-127 |  | Myf6l        | 0.516353 | 366.8394 | 2.81E-79  |  |
| Rn18s          | 0.48086  | 1989.581 | 4.39E-124 |  | Tap1           | 2.54306  | 1989.581  | 0                     |  | Tap1           | 2.532065 | 1857.855 | 0         |  | Tap1          | 2.205267 | 974.179  | 3.58E-211 |  | Tap1          | 2.236787 | 1235.175 | 2.80E-268 |  | Peg3         | 0.513586 | 511.8648 | 1.05E-110 |  |
| Nrn            | 0.494924 | 262.9334 | 4.64E-57  |  | Psmb9          | 2.468072 | 1894.588  | 0                     |  | MGC108823      | 2.530829 | 1268.024 | 1.03E-275 |  | Amy2a3        | 1.249019 | 223.0468 | 1.14E-48  |  | Amy2a3        | 2.08849  | 424.8264 | 1.20E-92  |  | Prrc2c       | 0.494083 | 492.9134 | 1.36E-106 |  |
| Mr2985         | 0.75581  | 175.1139 | 4.44E-38  |  | Prs1           | 2.463584 | 847.1418  | 2.24E-184             |  | Igk15          | 2.513454 | 724.017  | 8.96E-138 |  | Irfl1         | 2.207038 | 1950.347 | 0         |  | Irfl1         | 2.036899 | 1061.529 | 1.20E-230 |  | LOC100910973 | 0.49296  | 23.99905 | 1.13E-05  |  |
| Ndufb11        | 0.47449  | 823.671  | 6.49E-178 |  | Irfl27         | 2.44241  | 744.8114  | 3.37E-162             |  | Ctrb1          | 2.479793 | 595.1722 | 7.51E-130 |  | Psmb8         | 1.976308 | 754.7894 | 1.10E-163 |  | Irfl27        | 2.031194 | 1198.104 | 2.97E-260 |  | Utrn         | 0.468771 | 158.3293 | 2.31E-34  |  |
| Rpl21          | 0.47205  | 594.6018 | 1.45E-128 |  | Gbp2           | 2.335606 | 917.7638  | 1.13E-199             |  | Gbp2           | 2.284042 | 679.1581 | 4.65E-148 |  | Psmb9         | 1.863522 | 738.0021 | 4.43E-160 |  | Irgm          | 1.923837 | 1039.092 | 8.62E-226 |  | Mr325        | 0.478066 | 138.8247 | 3.81E-30  |  |
| Rps18          | 0.453791 | 953.4805 | 6.19E-206 |  | B2m            | 2.239668 | 6197.894  | 0                     |  | Prsr1          | 2.27058  | 474.3817 | 1.08E-103 |  | Irfl1         | 1.834416 | 719.8426 | 3.86E-156 |  | LOC1048592    | 0.473044 | 251.8228 | 1.72E-54  |  |              |          |          |           |  |
| Slc3a1         | 0.452956 | 143.5514 | 2.73E-31  |  | Amy2a3         | 2.191835 | 391.0578  | 1.54E-85              |  | RT1-A1         | 2.214186 | 2104.101 | 0         |  | RT1-A1        | 1.804877 | 1325.899 | 2.01E-287 |  | RT1-CE10      | 0.471883 | 194.8248 | 4.70E-42  |  |              |          |          |           |  |
| Ubc            | 0.449927 | 342.424  | 3.40E-74  |  | RT1-A1         | 2.182228 | 2526.496  | 0                     |  | Amy2a3         | 2.092449 | 228.7223 | 1.67E-50  |  | Cd74          | 1.781422 | 241.0513 | 1.44E-52  |  | Cxc19         | 1.824295 | 214.9373 | 3.04E-47  |  |              |          |          |           |  |
| Leng8          | 0.436853 | 133.7271 | 3.63E-29  |  | Irfl27         | 2.141895 | 3357.007  | 0                     |  | Cd74           | 2.04484  | 476.9718 | 2.96E-104 |  | Irfl47        | 1.774924 | 686.5068 | 4.71E-145 |  | Stat1         | 1.78694  | 1221.814 | 2.18E-265 |  | Hsp4a        | 0.465118 | 203.2143 | 5.46E-44  |  |
| Rack1          | 0.428835 | 533.5795 | 1.96E-115 |  | Irfl1          | 2.085408 | 1428.015  | 2.77274728700577e-311 |  | Irfl1          | 1.987711 | 1037.642 | 9.36E-226 |  | Irgm          | 1.696981 | 689.1904 | 1.63E-145 |  | RT1-A1        | 1.759754 | 1360.267 | 2.12E-295 |  | Il1r1        | 0.462667 | 124.3672 | 4.64E-27  |  |
| Rpl12          | 0.426551 | 715.5044 | 1.69E-154 |  | Cd74           | 2.077545 | 635.1885  | 1.90E-138             |  | Irfl47         | 1.984771 | 1251.588 | 3.80E-272 |  | Cxc19         | 1.524607 | 86.48278 | 2.86E-19  |  | Igtp          | 1.519881 | 706.5328 | 1.14E-153 |  | Hdtpb        | 0.458265 | 304.4351 | 8.92E-66  |  |
| Ppyl2          | 0.423441 | 167.4388 | 2.98E-36  |  | Zbed5          | 2.067514 | 102.38.39 | 0                     |  | Zbed5          | 1.984715 | 7690.686 | 0         |  | Zbed5         | 1.472466 | 484.332  | 0         |  | Gat8          | 1.378259 | 199.4065 | 6.90E-44  |  | Ubc          | 0.456795 | 345.258  | 1.32E-74  |  |
| Krt19          | 0.416608 | 109.0118 | 7.78E-24  |  | Manf           | 2.033074 | 9107.337  | 0                     |  | Irgm           | 1.917279 | 1067.188 | 3.68E-232 |  | Pht2          | 1.424647 | 1190.693 | 3.97E-358 |  | Cxc11         | 1.355368 | 1081.215 | 6.38E-235 |  | Cxc11        | 0.545463 | 57.88985 | 7.27E-13  |  |
| Rps17          | 0.412305 | 496.5115 | 1.91E-107 |  | Irfl47         | 2.005911 | 1553.014  | 0                     |  | Cxc19          | 1.816552 | 363.4693 | 1.10E-79  |  | Stat1         | 1.410817 | 176.9031 | 1.62E-155 |  | B2m           | 1.35171  | 1924.131 | 0         |  | Psmb8        | 0.451658 | 76.79974 | 6.83E-17  |  |
| Rbp4           | 0.411397 | 64.1453  | 2.54E-14  |  | Irgm           | 1.996087 | 1426.241  | 6.65520361968473e-311 |  | RT1-A1         | 1.785994 | 1657.39  | 0         |  | Manf          | 1.399759 | 3682.809 | 0         |  | Serping1      | 1.330687 | 676.995  | 2.80E-147 |  | RT1-A2       | 0.451296 | 162.4441 | 3.37E-35  |  |
| Cxc11          | 0.409311 | 491.2106 | 1.18E-20  |  | Cxc19          | 1.847959 | 504.0896  | 2.47E-98              |  | Manf           | 1.763388 | 5654.793 | 0         |  | Cela2a        | 1.367237 | 176.3129 | 1.31E-38  |  | Tapb1         | 1.299264 | 698.8678 | 5.22E-152 |  | Trp12        | 0.447062 | 134.0427 | 3.95E-29  |  |
| Rps16          | 0.399622 | 634.8046 | 3.33E-137 |  | Stat1          | 1.816712 | 1551.268  | 0                     |  | Stat1          | 1.756175 | 1161.506 | 1.26E-252 |  | Gast          | 1.356811 | 154.4528 | 6.48E-34  |  | RT1-S3        | 1.28903  | 483.9114 | 1.89E-105 |  | Golg4a       | 0.434189 | 252.1923 | 1.44E-54  |  |
| Gas5           | 0.397046 | 163.3513 | 1.57E-35  |  | RT1-S3         | 1.756621 | 1199.819  | 8.47E-261             |  | RT1-CE10       | 1.637944 | 1415.598 | 1.11E-307 |  | Stat1         | 1.356027 | 451.9102 | 3.81E-98  |  | Mem140        | 1.286412 | 619.1831 | 9.09E-138 |  | Gadd45g      | 0.432288 | 281.4841 | 7.66E-61  |  |
| Rps27a         | 0.393225 | 837.108  | 8.78E-181 |  | Pht2a          | 1.655903 | 1963.196  | 0                     |  | Serping1       | 1.623562 | 972.3563 | 1.33E-211 |  | Cope          | 1.319268 | 970.1217 | 2.63E-210 |  | Manf          | 1.275708 | 3262.105 | 0         |  | B2m          | 0.428991 | 281.7701 | 6.74E-61  |  |
| Mvp            | 0.392439 | 112.1504 | 1.67E-24  |  | Serping1       | 1.578815 | 1135.832  | 6.35E-247             |  | Rn18s          | 1.611889 | 6150.942 | 0         |  | Philp         | 1.307515 | 150.3028 | 5.13E-33  |  | Psmb10        | 1.275708 | 3262.105 | 0         |  | Calr         | 0.428188 | 749.9674 | 3.68E-162 |  |
| Rn45s          | 0.39225  | 591.3905 | 6.92E-128 |  | Igtp           | 1.565907 | 965.8775  | 4.51E-210             |  | Igtp           | 1.533332 | 760.3649 | 1.19E-165 |  | Igtp          | 1.270961 | 443.9905 | 4.94E-96  |  | Rtp4          | 1.270766 | 670.088  | 8.70E-146 |  | Fa2          | 0.427249 | 140.1973 | 1.95E-30  |  |
| Rpl51          | 0.389791 | 770.9437 | 1.66E-166 |  | Pkm            | 1.516918 | 4498.246  | 0                     |  | Psm1           | 1.50788  | 1882.112 | 0         |  | Irfl7         | 1.24951  | 395.9369 | 4.78E-86  |  | Irfl7         | 1.257881 | 409.655  | 2.28E-89  |  | Map2         | 0.418296 | 128.4169 | 6.32E-28  |  |
| Ppp1r14b       | 0.388739 | 451.1736 | 1.05E-97  |  | Cela2a         | 1.505035 | 361.49    | 8.88E-79              |  | Cela2a         | 1.47782  | 243.7487 | 9.30E-54  |  | Psmb10        | 1.226828 | 625.0162 | 1.23E-135 |  | Oas2          | 1.166297 | 509.5766 | 5.21E-111 |  | Rn18s        | 0.415839 | 467.8192 | 3.70E-101 |  |
| Rpl32          | 0.386356 | 851.592  | 7.27E-184 |  | Cope           | 1.494852 | 1574.812  | 0                     |  | Psmb10         | 1.447899 | 877.8502 | 4.09E-191 |  | Rtp4          | 1.224216 | 537.2003 | 1.34E-116 |  | Parp14        | 1.159213 | 492.0884 | 3.22E-107 |  | Golg1b       | 0.412143 | 175.6365 | 4.86E-38  |  |
| Rps10          | 0.384327 | 662.1953 | 3.90E-143 |  | Jun            | 1.476556 | 708.8176  | 2.18E-154             |  | RT1-S3         | 1.405259 | 586.9471 | 4.05E-128 |  | Iftm3         | 1.224172 | 76.29025 | 4.35E-17  |  | Ras2          | 1.133783 | 250.0172 | 8.01E-55  |  | Dnajc3       | 0.410085 | 302.3434 | 2.50E-65  |  |
| Rpl18a         | 0.382318 | 591.2393 | 7.17E-128 |  | Ube2l6         | 1.440431 | 957.3868  | 3.08E-208             |  | Chga           | 1.40057  | 1183.429 | 1.78E-257 |  | Cmps          | 1.218051 | 162.2465 | 1.38E-35  |  | Zbed5         | 1.1331   | 3097.525 | 0         |  | Pnm8a        | 0.406869 | 134.1346 | 3.80E-29  |  |
| Rabac1         | 0.381958 | 376.7847 | 1.36E-81  |  | Tapb1          | 1.368526 | 926.4668  | 1.51E-201             |  | Tapb1          | 1.352053 | 2320.401 | 0         |  | Tmem140       | 1.183239 | 489.3349 | 3.70E-106 |  | Stat1         | 1.113197 | 505.6205 | 3.76E-110 |  | Slc13a1      | 0.406413 | 110.5308 | 4.19E-24  |  |
| Lamtor2        | 0.381446 | 318.923  | 3.85E-69  |  | Irfl7          | 1.353701 | 700.5442  | 1.34E-152             |  | Tmem140        | 1.334091 | 680.925  | 1.93E-148 |  | Tapb1         | 1.17103  | 532.1831 | 1.63E-115 |  | Pht2a         | 1.103966 | 802.3805 | 1.92E-174 |  | Gsdma        | 0.402236 | 126.3681 | 7.15E-57  |  |
| Ndrf1          | 0.381381 | 206.8333 | 3.63E-45  |  | Iftm3          | 1.310165 | 765.0998  | 1.17E-36              |  | Tapb1          | 1.329497 | 720.6898 | 4.66E-157 |  | Serping1      | 1.16031  | 474.0158 | 6.27E-103 |  | Chga          | 1.095034 | 1511.175 | 0         |  | Snhg11       | 0.40064  | 581.3586 | 9.52E-126 |  |
| Cox6a1         | 0.381257 | 483.4536 | 1.15E-104 |  | Psm1           | 1.302723 | 1850.504  | 0                     |  | Gast           | 1.32804  | 189.9537 | 4.06E-42  |  | Gast          | 1.135052 | 421.5651 | 1.38E-91  |  | Jun           | 1.093582 | 342.2252 | 8.70E-75  |  | Cadps        | 0.398097 | 93.33851 | 2.04E-20  |  |
| Rps11          | 0.381173 | 562.8296 | 9.35E-122 |  | Tmem140        | 1.294664 | 770.247   | 1.02E-167             |  | Pkm            | 1.283547 | 2765.895 | 0         |  | Ras2          | 1.127824 | 183.8273 | 3.17E-40  |  | Ube2l6        | 1.093038 | 495.639  | 5.48E-108 |  | Hyoa1        | 0.394834 | 214.0765 | 1.47E-46  |  |
| Myf6l          | 0.380393 | 360.087  | 5.46E-78  |  | Philp          | 1.292051 | 235.1194  | 8.36E-52              |  | Philp          | 1.272013 | 162.8044 | 3.04E-36  |  |               |          |          |           |  |               |          |          |           |  |              |          |          |           |  |

**KRV11 vs PBS11**

| Term                                                                              | Count | %    | P-Value  | Benjamini |
|-----------------------------------------------------------------------------------|-------|------|----------|-----------|
| cellular response to interferon-beta                                              | 7     | 10.9 | 1.20E-09 | 4.60E-07  |
| defense response                                                                  | 7     | 10.9 | 8.90E-09 | 1.70E-06  |
| defense response to virus                                                         | 8     | 12.5 | 1.60E-07 | 2.00E-05  |
| immune response                                                                   | 9     | 14.1 | 2.00E-06 | 1.90E-04  |
| positive regulation of cAMP metabolic process                                     | 4     | 6.2  | 3.60E-06 | 2.70E-04  |
| antigen processing and presentation of peptide antigen via MHC class I            | 5     | 7.8  | 5.10E-06 | 3.20E-04  |
| positive regulation of leukocyte chemotaxis                                       | 4     | 6.2  | 1.40E-05 | 7.40E-04  |
| positive regulation of T cell mediated cytotoxicity                               | 4     | 6.2  | 2.90E-05 | 1.40E-03  |
| negative regulation of viral genome replication                                   | 4     | 6.2  | 1.20E-04 | 4.40E-03  |
| digestion                                                                         | 4     | 6.2  | 1.20E-04 | 4.40E-03  |
| response to virus                                                                 | 5     | 7.8  | 1.40E-04 | 4.60E-03  |
| antigen processing and presentation of endogenous peptide antigen via MHC class I | 3     | 4.7  | 1.50E-04 | 4.70E-03  |
| positive regulation of cAMP-mediated signaling                                    | 3     | 4.7  | 8.90E-04 | 2.60E-02  |

**KRV11 vs PBS11**

| Term        | Count | %  | P-Value  | Benjamini |
|-------------|-------|----|----------|-----------|
| translation | 7     | 50 | 8.00E-08 | 6.70E-06  |

**KRV11 vs pIC11**

| Term                                                                              | Count | %    | P-Value  | Benjamini |
|-----------------------------------------------------------------------------------|-------|------|----------|-----------|
| defense response                                                                  | 9     | 13.2 | 3.90E-12 | 1.80E-09  |
| cellular response to interferon-beta                                              | 7     | 10.3 | 1.90E-09 | 4.20E-07  |
| positive regulation of T cell mediated cytotoxicity                               | 6     | 8.8  | 4.40E-09 | 6.60E-07  |
| defense response to virus                                                         | 9     | 13.2 | 1.20E-08 | 1.40E-06  |
| negative regulation of viral genome replication                                   | 5     | 7.4  | 3.20E-06 | 2.50E-04  |
| immune response                                                                   | 9     | 13.2 | 3.40E-06 | 2.50E-04  |
| positive regulation of cAMP metabolic process                                     | 4     | 5.9  | 4.50E-06 | 2.90E-04  |
| antigen processing and presentation of peptide antigen via MHC class I            | 5     | 7.4  | 6.70E-06 | 3.80E-04  |
| response to virus                                                                 | 6     | 8.8  | 8.80E-06 | 4.40E-04  |
| positive regulation of leukocyte chemotaxis                                       | 4     | 5.9  | 1.70E-05 | 7.60E-04  |
| digestion                                                                         | 4     | 5.9  | 1.40E-04 | 5.90E-03  |
| antigen processing and presentation of endogenous peptide antigen via MHC class I | 3     | 4.4  | 1.70E-04 | 6.40E-03  |
| response to interferon-beta                                                       | 3     | 4.4  | 4.10E-04 | 1.40E-02  |
| response to mechanical stimulus                                                   | 5     | 7.4  | 4.40E-04 | 1.40E-02  |
| protein refolding                                                                 | 3     | 4.4  | 5.10E-04 | 1.50E-02  |
| positive regulation of cAMP-mediated signaling                                    | 3     | 4.4  | 1.00E-03 | 2.90E-02  |

**KRV11 vs KRV9**

| Term                                           | Count | %    | P-Value  | Benjamini |
|------------------------------------------------|-------|------|----------|-----------|
| cellular response to interferon-beta           | 7     | 14.9 | 2.30E-10 | 6.70E-08  |
| defense response                               | 7     | 14.9 | 1.70E-09 | 2.50E-07  |
| defense response to virus                      | 7     | 14.9 | 6.60E-07 | 6.40E-05  |
| immune response                                | 7     | 14.9 | 4.50E-05 | 3.10E-03  |
| digestion                                      | 4     | 8.5  | 5.30E-05 | 3.10E-03  |
| positive regulation of cAMP metabolic process  | 3     | 6.4  | 2.60E-04 | 1.30E-02  |
| positive regulation of cAMP-mediated signaling | 3     | 6.4  | 5.20E-04 | 2.20E-02  |
| positive regulation of leukocyte chemotaxis    | 3     | 6.4  | 6.00E-04 | 2.20E-02  |
| response to virus                              | 4     | 8.5  | 1.10E-03 | 3.40E-02  |

**KRV9 vs KRV7**

| Term            | Count | %  | P-Value  | Benjamini |
|-----------------|-------|----|----------|-----------|
| immune response | 3     | 60 | 6.90E-04 | 3.20E-02  |

**KRV11 vs KRV7**

| Term                                                                              | Count | %    | P-Value  | Benjamini |
|-----------------------------------------------------------------------------------|-------|------|----------|-----------|
| cellular response to interferon-beta                                              | 7     | 16.3 | 1.10E-10 | 3.60E-08  |
| defense response                                                                  | 7     | 16.3 | 7.90E-10 | 1.30E-07  |
| defense response to virus                                                         | 7     | 16.3 | 3.10E-07 | 3.50E-05  |
| positive regulation of cAMP metabolic process                                     | 4     | 9.3  | 1.10E-06 | 9.40E-05  |
| immune response                                                                   | 7     | 16.3 | 2.20E-05 | 1.50E-03  |
| antigen processing and presentation of endogenous peptide antigen via MHC class I | 3     | 7    | 6.80E-05 | 3.90E-03  |
| positive regulation of cAMP-mediated signaling                                    | 3     | 7    | 4.10E-04 | 2.00E-02  |
| positive regulation of leukocyte chemotaxis                                       | 3     | 7    | 4.70E-04 | 2.00E-02  |
| response to virus                                                                 | 4     | 9.3  | 7.40E-04 | 2.60E-02  |
| positive regulation of T cell mediated cytotoxicity                               | 3     | 7    | 7.60E-04 | 2.60E-02  |
| defense response to Gram-positive bacterium                                       | 4     | 9.3  | 1.00E-03 | 3.20E-02  |

**KRV11 vs KRV7**

| Term        | Count | %    | P-Value  | Benjamini |
|-------------|-------|------|----------|-----------|
| translation | 9     | 39.1 | 6.90E-09 | 4.30E-07  |
| digestion   | 3     | 13   | 5.80E-04 | 1.80E-02  |



| Count | %    | P-Value  | Benjamini |
|-------|------|----------|-----------|
| 9     | 15.8 | 6.40E-14 | 2.10E-11  |
| 9     | 15.8 | 9.90E-13 | 1.70E-10  |
| 10    | 17.5 | 1.00E-10 | 1.20E-08  |
| 9     | 15.8 | 9.40E-07 | 7.90E-05  |
| 5     | 8.8  | 1.60E-06 | 1.10E-04  |
| 5     | 8.8  | 3.50E-06 | 1.90E-04  |
| 6     | 10.5 | 3.90E-06 | 1.90E-04  |
| 4     | 7    | 2.20E-05 | 9.10E-04  |
| 7     | 12.3 | 1.10E-04 | 3.70E-03  |
| 3     | 5.3  | 1.20E-04 | 3.70E-03  |
| 3     | 5.3  | 1.20E-04 | 3.70E-03  |
| 3     | 5.3  | 1.70E-04 | 4.80E-03  |
| 3     | 5.3  | 2.90E-04 | 7.60E-03  |
| 3     | 5.3  | 3.70E-04 | 8.80E-03  |
| 3     | 5.3  | 7.40E-04 | 1.60E-02  |
| 3     | 5.3  | 8.50E-04 | 1.80E-02  |

| Count | %    | P-Value  | Benjamini |
|-------|------|----------|-----------|
| 9     | 14.3 | 1.20E-13 | 4.70E-11  |
| 9     | 14.3 | 1.90E-12 | 3.70E-10  |
| 11    | 17.5 | 6.70E-12 | 8.60E-10  |
| 6     | 9.5  | 3.40E-08 | 3.30E-06  |
| 7     | 11.1 | 2.10E-07 | 1.60E-05  |
| 9     | 14.3 | 1.70E-06 | 1.10E-04  |
| 5     | 7.9  | 4.70E-06 | 2.60E-04  |
| 4     | 6.3  | 2.70E-05 | 1.30E-03  |
| 3     | 4.8  | 1.40E-04 | 5.60E-03  |
| 3     | 4.8  | 1.40E-04 | 5.60E-03  |
| 7     | 11.1 | 1.60E-04 | 5.70E-03  |
| 3     | 4.8  | 2.00E-04 | 6.50E-03  |
| 7     | 11.1 | 2.40E-04 | 7.10E-03  |
| 3     | 4.8  | 3.40E-04 | 9.50E-03  |
| 3     | 4.8  | 4.30E-04 | 1.10E-02  |
| 6     | 9.5  | 8.20E-04 | 2.00E-02  |
| 3     | 4.8  | 8.60E-04 | 2.00E-02  |
| 3     | 4.8  | 9.90E-04 | 2.10E-02  |

| Count | %   | P-Value  | Benjamini |
|-------|-----|----------|-----------|
| 9     | 2.3 | 1.80E-08 | 3.00E-05  |
| 13    | 3.3 | 7.60E-08 | 6.20E-05  |
| 8     | 2   | 3.00E-07 | 1.60E-04  |
| 10    | 2.6 | 7.70E-07 | 3.10E-04  |
| 14    | 3.6 | 1.30E-06 | 4.10E-04  |
| 13    | 3.3 | 2.40E-06 | 6.40E-04  |
| 16    | 4.1 | 7.70E-06 | 1.80E-03  |
| 6     | 1.5 | 1.10E-05 | 2.20E-03  |
| 7     | 1.8 | 1.20E-05 | 2.20E-03  |
| 9     | 2.3 | 1.40E-05 | 2.30E-03  |
| 12    | 3.1 | 5.80E-05 | 8.70E-03  |
| 4     | 1   | 7.60E-05 | 1.00E-02  |
| 9     | 2.3 | 1.40E-04 | 1.80E-02  |
| 8     | 2   | 2.70E-04 | 3.20E-02  |
| 8     | 2   | 3.00E-04 | 3.30E-02  |
| 6     | 1.5 | 3.40E-04 | 3.40E-02  |
| 4     | 1   | 4.10E-04 | 3.90E-02  |
| 7     | 1.8 | 5.00E-04 | 4.60E-02  |
| 5     | 1.3 | 5.80E-04 | 4.90E-02  |
| 4     | 1   | 6.00E-04 | 4.90E-02  |

| hot' beta cell DE pathways |            |                                                              |
|----------------------------|------------|--------------------------------------------------------------|
| pathway#                   | Symbol     | description                                                  |
| 1                          | Gbp2       | guanylate binding protein 2(Gbp2)                            |
|                            | Irgm       | immunity-related GTPase M(Irgm)                              |
|                            | Igtp       | interferon gamma induced GTPase(Igtp)                        |
|                            | Ifi47      | interferon gamma inducible protein 47(Ifi47)                 |
|                            | Irf1       | interferon regulatory factor 1(Irf1)                         |
|                            | Stat1      | signal transducer and activator of transcription 1(Stat1)    |
|                            | MGC105567  | similar to cDNA sequence BC023105(MGC105567)                 |
|                            | MGC108823  | similar to interferon-inducible GTPase(MGC108823)            |
|                            | RGD1309362 | similar to interferon-inducible GTPase(RGD1309362)           |
|                            |            |                                                              |
| 2                          | Cd74       | CD74 molecule(Cd74)                                          |
|                            | Tapbp      | TAP binding protein(Tapbp)                                   |
|                            | Irgm       | immunity-related GTPase M(Irgm)                              |
|                            | Igtp       | interferon gamma induced GTPase(Igtp)                        |
|                            | Ifi47      | interferon gamma inducible protein 47(Ifi47)                 |
|                            | MGC105567  | similar to cDNA sequence BC023105(MGC105567)                 |
|                            | MGC108823  | similar to interferon-inducible GTPase(MGC108823)            |
|                            | RGD1309362 | similar to interferon-inducible GTPase(RGD1309362)           |
|                            | Tap1       | transporter 1, ATP binding cassette subfamily B member(Tap1) |
|                            |            |                                                              |
| 3                          | Oasl2      | 2'-5' oligoadenylate synthetase-like 2(Oasl2)                |
|                            | Cxcl10     | C-X-C motif chemokine ligand 10(Cxcl10)                      |
|                            | Cxcl9      | C-X-C motif chemokine ligand 9(Cxcl9)                        |
|                            | Isg15      | ISG15 ubiquitin-like modifier(Isg15)                         |
|                            | Mx2        | MX dynamin like GTPase 2(Mx2)                                |
|                            | Bst2       | bone marrow stromal cell antigen 2(Bst2)                     |
|                            | Ifitm3     | interferon induced transmembrane protein 3(Ifitm3)           |
|                            | Irf1       | interferon regulatory factor 1(Irf1)                         |
|                            | Rsad2      | radical S-adenosyl methionine domain containing 2(Rsad2)     |
|                            | Stat2      | signal transducer and activator of transcription 2(Stat2)    |
| 4                          | Oasl2      | 2'-5' oligoadenylate synthetase-like 2(Oasl2)                |
|                            | Cxcl10     | C-X-C motif chemokine ligand 10(Cxcl10)                      |
|                            | Cxcl11     | C-X-C motif chemokine ligand 11(Cxcl11)                      |
|                            | Cxcl9      | C-X-C motif chemokine ligand 9(Cxcl9)                        |
|                            | Cd74       | CD74 molecule(Cd74)                                          |
|                            | RT1-CE10   | RT1 class I, locus CE10(RT1-CE10)                            |
|                            | RT1-CE5    | RT1 class I, locus CE5(RT1-CE5)                              |
|                            | RT1-A1     | RT1 class Ia, locus A1(RT1-A1)                               |
|                            | RT1-A2     | RT1 class Ia, locus A2(RT1-A2)                               |
|                            |            |                                                              |
| 5                          | Isg15      | ISG15 ubiquitin-like modifier(Isg15)                         |
|                            | Mx2        | MX dynamin like GTPase 2(Mx2)                                |
|                            | Bst2       | bone marrow stromal cell antigen 2(Bst2)                     |
|                            | Ifitm3     | interferon induced transmembrane protein 3(Ifitm3)           |
|                            | Rsad2      | radical S-adenosyl methionine domain containing 2(Rsad2)     |
| 6                          | RT1-CE10   | RT1 class I, locus CE10(RT1-CE10)                            |
|                            | RT1-CE5    | RT1 class I, locus CE5(RT1-CE5)                              |
|                            | RT1-A1     | RT1 class Ia, locus A1(RT1-A1)                               |
|                            | RT1-A2     | RT1 class Ia, locus A2(RT1-A2)                               |
|                            | RT1-S3     | RT1 class Ib, locus S3(RT1-S3)                               |
| 7                          | Oasl2      | 2'-5' oligoadenylate synthetase-like 2(Oasl2)                |
|                            | Cxcl10     | C-X-C motif chemokine ligand 10(Cxcl10)                      |
|                            | Mx2        | MX dynamin like GTPase 2(Mx2)                                |
|                            | Bst2       | bone marrow stromal cell antigen 2(Bst2)                     |
|                            | Ifitm3     | interferon induced transmembrane protein 3(Ifitm3)           |
|                            | Rsad2      | radical S-adenosyl methionine domain containing 2(Rsad2)     |
|                            |            |                                                              |
| 8                          | RT1-A1     | RT1 class Ia, locus A1(RT1-A1)                               |
|                            | RT1-A2     | RT1 class Ia, locus A2(RT1-A2)                               |
|                            | RT1-S3     | RT1 class Ib, locus S3(RT1-S3)                               |
|                            | B2m        | beta-2 microglobulin(B2m)                                    |
|                            |            |                                                              |
| 9                          | Oasl2      | 2'-5' oligoadenylate synthetase-like 2(Oasl2)                |

| 'cool' beta cell DE pathways |          |                                                                          |
|------------------------------|----------|--------------------------------------------------------------------------|
| pathway#                     | Symbol   | description                                                              |
| 20                           | Dnajc3   | DnaJ heat shock protein family (Hsp40) member C3(Dnajc3)                 |
|                              | Faf2     | Fas associated factor family member 2(Faf2)                              |
|                              | Stt3b    | STT3B, catalytic subunit of the oligosaccharyltransferase complex(Stt3b) |
|                              | Erp44    | endoplasmic reticulum protein 44(Erp44)                                  |
|                              | Hspa1a   | heat shock 70kD protein 1A(Hspa1a)                                       |
|                              | Hsp90ab1 | heat shock protein 90 alpha family class B member 1(Hsp90ab1)            |
|                              | Hspe1    | heat shock protein family E member 1(Hspe1)                              |
|                              | Herpud1  | homocysteine inducible ER protein with ubiquitin like domain 1(Herpud1)  |
|                              | Manf     | mesencephalic astrocyte-derived neurotrophic factor(Manf)                |
|                              |          |                                                                          |
| 21                           | Ddrk1    | DDRKG domain containing 1(Ddrk1)                                         |
|                              | Ufl1     | Ufm1-specific ligase 1(Ufl1)                                             |
|                              | Xbp1     | X-box binding protein 1(Xbp1)                                            |
|                              | Erp29    | endoplasmic reticulum protein 29(Erp29)                                  |
|                              | Erp44    | endoplasmic reticulum protein 44(Erp44)                                  |
|                              | Eef2     | eukaryotic translation elongation factor 2(Eef2)                         |
|                              | Hspa5    | heat shock protein family A member 5(Hspa5)                              |
|                              | Herpud1  | homocysteine inducible ER protein with ubiquitin like domain 1(Herpud1)  |
|                              | Pdia3    | protein disulfide isomerase family A, member 3(Pdia3)                    |
|                              | Pdia6    | protein disulfide isomerase family A, member 6(Pdia6)                    |
| 22                           | Sdf2l1   | stromal cell-derived factor 2-like 1(Sdf2l1)                             |
|                              | Ufc1     | ubiquitin-fold modifier conjugating enzyme 1(Ufc1)                       |
|                              | Uba5     | ubiquitin-like modifier activating enzyme 5(Uba5)                        |
|                              |          |                                                                          |
|                              | Eif2s3   | eukaryotic translation initiation factor 2 subunit gamma(Eif2s3)         |
|                              | Eif3c    | eukaryotic translation initiation factor 3, subunit C(Eif3c)             |
|                              | Eif3d    | eukaryotic translation initiation factor 3, subunit D(Eif3d)             |
|                              | Eif3g    | eukaryotic translation initiation factor 3, subunit G(Eif3g)             |
|                              | Eif3h    | eukaryotic translation initiation factor 3, subunit H(Eif3h)             |
|                              | Eif3i    | eukaryotic translation initiation factor 3, subunit I(Eif3i)             |
| 23                           | Eif3m    | eukaryotic translation initiation factor 3, subunit M(Eif3m)             |
|                              | Rps2     | ribosomal protein S2(Rps2)                                               |
|                              |          |                                                                          |
|                              | Eif2s3   | eukaryotic translation initiation factor 2 subunit gamma(Eif2s3)         |
|                              | Eif3c    | eukaryotic translation initiation factor 3, subunit C(Eif3c)             |
|                              | Eif3d    | eukaryotic translation initiation factor 3, subunit D(Eif3d)             |
|                              | Eif3g    | eukaryotic translation initiation factor 3, subunit G(Eif3g)             |
|                              | Eif3h    | eukaryotic translation initiation factor 3, subunit H(Eif3h)             |
|                              | Eif3i    | eukaryotic translation initiation factor 3, subunit I(Eif3i)             |
|                              | Eif3l    | eukaryotic translation initiation factor 3, subunit L(Eif3l)             |
| 24                           | Eif4a1   | eukaryotic translation initiation factor 4A1(Eif4a1)                     |
|                              | Eif4e2   | eukaryotic translation initiation factor 4E family member 2(Eif4e2)      |
|                              | Eif6     | eukaryotic translation initiation factor 6(Eif6)                         |
|                              |          |                                                                          |
|                              | Pgl3     | 6-phosphogluconolactonase(Pgl3)                                          |
|                              | B3gat3   | beta-1,3-glucuronyltransferase 3(B3gat3)                                 |
|                              | Fuca2    | fucosidase, alpha-L-2-, plasma(Fuca2)                                    |
|                              | Gapdh    | glyceraldehyde-3-phosphate dehydrogenase(Gapdh)                          |
|                              | Glo1     | glyoxalase 1(Glo1)                                                       |
|                              | Hexb     | hexosaminidase subunit beta(Hexb)                                        |
| 25                           | Hagh     | hydroxyacyl glutathione hydrolase(Hagh)                                  |
|                              | Mdh1     | malate dehydrogenase 1(Mdh1)                                             |
|                              | Mdh2     | malate dehydrogenase 2(Mdh2)                                             |
|                              | Mlec     | malectin(Mlec)                                                           |
|                              | Pgk1     | phosphoglycerate kinase 1(Pgk1)                                          |
|                              | Slc3a1   | solute carrier family 3 member 1(Slc3a1)                                 |
|                              | Slc3a2   | solute carrier family 3 member 2(Slc3a2)                                 |
|                              | Taldo1   | transaldolase 1(Taldo1)                                                  |
|                              |          |                                                                          |
|                              | Xbp1     | X-box binding protein 1(Xbp1)                                            |
|                              | Cdk4     | cyclin-dependent kinase 4(Cdk4)                                          |
|                              | Hsp90ab1 | heat shock protein 90 alpha family class B member 1(Hsp90ab1)            |
|                              | Hspa5    | heat shock protein family A member 5(Hspa5)                              |
|                              | Rpl3     | ribosomal protein L3(Rpl3)                                               |
|                              | Rps2     | ribosomal protein S2(Rps2)                                               |
|                              | Rplp0    | ribosomal protein lateral stalk subunit P0(Rplp0)                        |
|                              |          |                                                                          |
|                              |          |                                                                          |
|                              |          |                                                                          |
|                              |          |                                                                          |

|           |          |                                                              |    |         |                                                                          |
|-----------|----------|--------------------------------------------------------------|----|---------|--------------------------------------------------------------------------|
|           | Mx2      | MX dynamin like GTPase 2(Mx2)                                |    |         |                                                                          |
|           | B2m      | beta-2 microglobulin(B2m)                                    | 26 | Dnajb9  | DnaI heat shock protein family (Hsp40) member B9(Dnajb9)                 |
|           | Bst2     | bone marrow stromal cell antigen 2(Bst2)                     |    | Edem2   | ER degradation enhancing alpha-mannosidase like protein 2(Edem2)         |
|           | Irgm     | immunity-related GTPase M(Irgm)                              |    | Faf2    | Fas associated factor family member 2(Faf2)                              |
|           | Rsad2    | radical S-adenosyl methionine domain containing 2(Rsad2)     |    | Stt3b   | STT3B, catalytic subunit of the oligosaccharyltransferase complex(Stt3b) |
|           | Serping1 | serpin family G member 1(Serping1)                           |    | Psmc1   | proteasome 26S subunit, ATPase 1(Psmc1)                                  |
|           |          |                                                              |    | Psmc2   | proteasome 26S subunit, ATPase 2(Psmc2)                                  |
| 10        | Tapbp    | TAP binding protein(Tapbp)                                   |    | Psmc4   | proteasome 26S subunit, ATPase 4(Psmc4)                                  |
|           | B2m      | beta-2 microglobulin(B2m)                                    |    | Psmc5   | proteasome 26S subunit, ATPase 5(Psmc5)                                  |
|           | Tap1     | transporter 1, ATP binding cassette subfamily B member(Tap1) |    | Selenos | selenoprotein S(Selenos)                                                 |
| 11        | Ifitm3   | interferon induced transmembrane protein 3(ifitm3)           | 27 | Atp1b1  | ATPase Na+/K+ transporting subunit beta 1(Atp1b1)                        |
|           | Stat1    | signal transducer and activator of transcription 1(Stat1)    |    | Calr    | calreticulin(Calr)                                                       |
|           | Stat2    | signal transducer and activator of transcription 2(Stat2)    |    | Cct2    | chaperonin containing TCP1 subunit 2(Cct2)                               |
| 12        | Isg15    | ISG15 ubiquitin-like modifier(Isg15)                         |    | Cct4    | chaperonin containing TCP1 subunit 4(Cct4)                               |
|           | Mx2      | MX dynamin like GTPase 2(Mx2)                                |    | Cct5    | chaperonin containing TCP1 subunit 5(Cct5)                               |
|           | Stat1    | signal transducer and activator of transcription 1(Stat1)    |    | Cct7    | chaperonin containing TCP1 subunit 7(Cct7)                               |
| 13        | Bst2     | bone marrow stromal cell antigen 2(Bst2)                     |    | Clu     | clusterin(Clu)                                                           |
|           | Ifitm3   | interferon induced transmembrane protein 3(ifitm3)           |    | Gapdh   | glyceraldehyde-3-phosphate dehydrogenase(Gapdh)                          |
|           | Stat1    | signal transducer and activator of transcription 1(Stat1)    |    | Hspa1a  | heat shock 70kD protein 1A(Hspa1a)                                       |
| 14,15, 16 | Cxcl10   | C-X-C motif chemokine ligand 10(Cxcl10)                      |    | Lamp2   | lysosomal-associated membrane protein 2(Lamp2)                           |
|           | Cxcl11   | C-X-C motif chemokine ligand 11(Cxcl11)                      |    | Ppib    | peptidylprolyl isomerase B(Ppib)                                         |
|           | Cxcl9    | C-X-C motif chemokine ligand 9(Cxcl9)                        |    | Phb     | prohibitin(Phb)                                                          |
| 17        | Cxcl10   | C-X-C motif chemokine ligand 10(Cxcl10)                      |    |         |                                                                          |
|           | Cxcl11   | C-X-C motif chemokine ligand 11(Cxcl11)                      |    |         |                                                                          |
|           | Cxcl9    | C-X-C motif chemokine ligand 9(Cxcl9)                        |    |         |                                                                          |
|           | Jun      | Jun proto-oncogene, AP-1 transcription factor subunit(Jun)   |    |         |                                                                          |
|           | Nfkbia   | NFKB inhibitor alpha(Nfkbia)                                 |    |         |                                                                          |
|           | Il18bp   | interleukin 18 binding protein(Il18bp)                       |    |         |                                                                          |
|           | Stat1    | signal transducer and activator of transcription 1(Stat1)    |    |         |                                                                          |
| 18        | Cxcl10   | C-X-C motif chemokine ligand 10(Cxcl10)                      |    |         |                                                                          |
|           | Cxcl11   | C-X-C motif chemokine ligand 11(Cxcl11)                      |    |         |                                                                          |
|           | Cxcl9    | C-X-C motif chemokine ligand 9(Cxcl9)                        |    |         |                                                                          |
|           | Nfkbia   | NFKB inhibitor alpha(Nfkbia)                                 |    |         |                                                                          |
|           | S100a11  | S100 calcium binding protein A11(S100a11)                    |    |         |                                                                          |
|           | Irf1     | interferon regulatory factor 1(Irf1)                         |    |         |                                                                          |

| piC11 vs PBS11 | logFC    | LR       | pAdj      | KRV11 vs piC11 | logFC    | LR       | pAdj                | KRV11 vs PBS11 | logFC    | LR       | pAdj      | KRV11 vs KRV9 | logFC    | LR       | pAdj      | KRV11 vs KRV7 | logFC    | LR       | pAdj      | KRV9 vs KRV7 | logFC    | LR       | pAdj      |
|----------------|----------|----------|-----------|----------------|----------|----------|---------------------|----------------|----------|----------|-----------|---------------|----------|----------|-----------|---------------|----------|----------|-----------|--------------|----------|----------|-----------|
| B2m            | 0.904984 | 760.3292 | 3.65E-164 | Ubd            | 4.24049  | 1003.019 | 1.06E-217           | Ubd            | 4.324745 | 1183.889 | 4.78E-257 | Ubd           | 3.874671 | 481.645  | 2.41E-104 | Ubd           | 4.203075 | 697.9095 | 1.48E-151 | Ubd          | 1.502975 | 667.3607 | 5.43E-144 |
| RT1-A2         | 0.785026 | 212.8124 | 6.12E-46  | LOC100910973   | 4.036382 | 1600.183 | 0                   | LOC100910973   | 4.127803 | 582.8575 | 1.20E-126 | LOC100910973  | 3.821927 | 867.0444 | 4.55E-188 | LOC100911498  | 3.821927 | 1127.636 | 1.11E-244 | Ppy          | 1.407689 | 266.5403 | 2.47E-57  |
| RT1-CE10       | 0.738665 | 206.3089 | 1.56E-44  | LOC100911498   | 3.810893 | 6891.491 | 0                   | LOC100911498   | 3.746911 | 4282.96  | 0         | lgs15         | 2.940509 | 941.9527 | 5.43E-204 | Gadd45g       | 0.879116 | 479.2492 | 2.90E-103 | Gadd45g      | 0.879116 | 479.2492 | 2.90E-103 |
| Rn45s          | 0.658654 | 565.2471 | 4.09E-122 | lgs15          | 3.107135 | 1219.751 | 1.36E-264           | B2m            | 3.130296 | 3665.661 | 0         | Cxcl10        | 2.850517 | 362.8205 | 1.21E-78  | Peg3          | 0.656422 | 595.6796 | 1.58E-102 | Peg3         | 0.656422 | 595.6796 | 1.58E-102 |
| Rn18s          | 0.643638 | 363.8204 | 1.11E-78  | Cxcl10         | 2.736201 | 377.733  | 3.38E-82            | Cxcl10         | 2.885444 | 351.5494 | 1.43E-76  | MGC108823     | 2.036585 | 765.5957 | 8.92E-166 | Klf9          | 0.618581 | 145.9477 | 2.35E-31  | Klf9         | 0.618581 | 145.9477 | 2.35E-31  |
| My6l           | 0.63782  | 254.8084 | 4.73E-55  | MGC108823      | 2.256953 | 1247.913 | 1.06E-270           | Psmb9          | 2.293743 | 1044.222 | 9.73E-227 | Tap1          | 1.839865 | 753.3167 | 3.28E-164 | Nr4a4         | 0.600516 | 191.493  | 3.99E-41  | Nr4a4        | 0.600516 | 191.493  | 3.99E-41  |
| Mgp            | 0.618624 | 33.91783 | 1.92E-07  | B2m            | 2.184873 | 3545.265 | 0                   | RT1-CE5        | 2.246864 | 1167.771 | 1.50E-253 | RT1-CE5       | 1.631308 | 898.6984 | 1.18E-194 | My6l          | 0.596705 | 274.203  | 5.79E-59  | My6l         | 0.596705 | 274.203  | 5.79E-59  |
| Cyb2a2         | 0.592291 | 206.6606 | 1.33E-44  | Psmb8          | 2.16592  | 1436.993 | 1.00665632179669e-3 | Psmb8          | 2.241141 | 1000.537 | 2.67E-217 | Psmb8         | 1.54059  | 747.6467 | 6.34E-162 | Psmb8         | 1.871441 | 1013.768 | 5.28E-220 | LOC100910973 | 0.586502 | 50.64793 | 3.41E-11  |
| Rpl13a         | 0.570339 | 371.2403 | 6.85E-158 | RT1-CE5        | 2.160009 | 1623.74  | 0                   | MGC108823      | 2.236627 | 824.7297 | 4.05E-179 | Irf1          | 1.505406 | 525.5724 | 8.31E-114 | Stat1         | 1.779585 | 845.5445 | 1.52E-183 | Psm8a8b      | 0.546455 | 104.2589 | 4.01E-30  |
| Rpl21          | 0.561271 | 477.1462 | 4.40E-103 | Tap1           | 2.138359 | 1179.394 | 7.28E-256           | Tap1           | 2.005234 | 686.9496 | 3.08E-149 | Zbed5         | 1.429279 | 2217.312 | 3.11E-4   | Psmb9         | 1.701901 | 857.5295 | 3.97E-186 | Prrc2c       | 0.54443  | 350.0938 | 2.20E-75  |
| Rps17          | 0.554789 | 468.7265 | 2.68E-101 | Ifi27          | 2.055559 | 716.8578 | 1.11E-155           | Zbed5          | 1.939016 | 2550.786 | 0         | Irf1          | 1.667467 | 643.8536 | 7.52E-140 | Hspa4         | 0.52316  | 128.373  | 1.41E-27  | Hspa4        | 0.52316  | 128.373  | 1.41E-27  |
| Rack1          | 0.549296 | 371.5652 | 2.38E-80  | Psmb9          | 1.954471 | 1199.322 | 3.62E-260           | lgs15          | 1.934084 | 316.5149 | 5.38E-69  | Irgm          | 1.526659 | 614.2305 | 2.01E-133 | LOC100362110  | 0.508126 | 191.8996 | 3.32E-41  | LOC100362110 | 0.508126 | 191.8996 | 3.32E-41  |
| Rps18          | 0.534411 | 860.3212 | 1.33E-185 | Zbed5          | 1.804979 | 3336.89  | 0                   | RT1-A1         | 1.775085 | 753.44   | 1.14E-163 | Psmb10        | 1.50665  | 671.2821 | 8.77E-146 | Pcl0          | 0.506206 | 89.6192  | 3.32E-19  | Pcl0         | 0.506206 | 89.6192  | 3.32E-19  |
| Rpl12          | 0.525518 | 547.669  | 2.47E-118 | Stat1          | 1.763476 | 928.9159 | 1.30E-201           | Rn18s          | 1.68861  | 3326.313 | 0         | Gbp2          | 1.402271 | 376.2655 | 1.52E-81  | Ash1l         | 0.505024 | 136.5347 | 2.45E-29  | Ash1l        | 0.505024 | 136.5347 | 2.45E-29  |
| Rps15          | 0.522392 | 604.9687 | 1.27E-130 | RT1-A1         | 1.703209 | 1020.14  | 2.10E-221           | Irf1           | 1.687288 | 518.1827 | 1.24E-112 | Psmb9         | 1.381069 | 590.6978 | 7.03E-128 | LOC498592     | 0.499731 | 165.1998 | 1.71E-35  | LOC498592    | 0.499731 | 165.1998 | 1.71E-35  |
| Rps27a         | 0.507465 | 936.9224 | 1.18E-201 | RT1-S3         | 1.685932 | 854.0229 | 2.27E-185           | Ifi27          | 1.652339 | 324.4793 | 1.02E-70  | Psmb10        | 1.332299 | 568.0917 | 5.48E-123 | Pnn           | 0.499404 | 191.9134 | 3.32E-41  | Pnn          | 0.499404 | 191.9134 | 3.32E-41  |
| Rpl32          | 0.505078 | 892.3591 | 1.92E-192 | Irf1           | 1.648403 | 724.2843 | 2.74E-157           | Stat1          | 1.629586 | 545.8101 | 1.28E-118 | Ifi47         | 1.324377 | 487.3616 | 1.40E-105 | Serping1      | 1.338737 | 668.8413 | 2.94E-145 | Stat1bp1     | 0.494929 | 146.5051 | 1.80E-31  |
| Rps10          | 0.494344 | 684.0545 | 1.02E-147 | Irgm           | 1.578938 | 755.1739 | 5.88E-164           | Psmb10         | 1.584307 | 548.6828 | 3.13E-119 | Tapbp         | 1.291283 | 195.2279 | 1.95E-42  | Atp8b1        | 0.494706 | 109.3914 | 1.51E-23  | Atp8b1       | 0.494706 | 109.3914 | 1.51E-23  |
| Rpl16          | 0.49432  | 881.9068 | 1.16E-125 | Hspa1a         | 1.459335 | 705.4197 | 3.37E-153           | Hspa1a         | 1.528549 | 628.1904 | 1.75E-136 | Rtp4          | 1.259719 | 505.5742 | 1.70E-109 | Srrm2         | 0.494572 | 204.9968 | 1.16E-52  | Srrm2        | 0.494572 | 204.9968 | 1.16E-52  |
| Ubc            | 0.485825 | 125.0227 | 5.60E-27  | Ifi47          | 1.435187 | 655.2934 | 2.32E-142           | Rn45s          | 1.528411 | 3743.106 | 0         | RT1-A1        | 1.173534 | 437.2572 | 9.36E-95  | Ubc           | 0.489889 | 182.9435 | 2.67E-39  | Ubc          | 0.489889 | 182.9435 | 2.67E-39  |
| Rpl18a         | 0.485723 | 549.224  | 1.19E-118 | Gbp2           | 1.430115 | 515.6664 | 4.42E-112           | Irgm           | 1.512017 | 467.3779 | 1.24E-101 | Tapbp         | 1.119872 | 374.0582 | 4.52E-81  | Golgpa        | 0.489063 | 115.1476 | 9.07E-25  | Golgpa       | 0.489063 | 115.1476 | 9.07E-25  |
| Rpl11          | 0.481753 | 783.7238 | 3.98E-169 | Serping1       | 1.384571 | 796.0983 | 4.04E-173           | Ifi47          | 1.490126 | 496.8925 | 5.00E-108 | RT1-S3        | 1.115849 | 346.9028 | 3.46E-75  | Nsd1          | 0.48855  | 107.1484 | 4.49E-23  | Nsd1         | 0.48855  | 107.1484 | 4.49E-23  |
| Rpl17          | 0.474498 | 577.0129 | 1.19E-124 | Psmb10         | 1.321611 | 606.4109 | 9.30E-132           | RT1-A2         | 1.446544 | 353.9533 | 4.77E-116 | Pheta2        | 1.10611  | 479.8405 | 5.73E-104 | Smrca5        | 0.48678  | 103.9203 | 2.20E-22  | Smrca5       | 0.48678  | 103.9203 | 2.20E-22  |
| Rps25          | 0.474096 | 416.0825 | 5.57E-90  | Fosb           | 1.317593 | 562.1583 | 3.66E-122           | Gbp2           | 1.382206 | 330.7724 | 4.44E-72  | Oasl2         | 1.104785 | 351.1644 | 4.14E-76  | Cish          | 0.485955 | 101.7878 | 6.15E-22  | Cish         | 0.485955 | 101.7878 | 6.15E-22  |
| Rps11          | 0.469336 | 382.0553 | 1.32E-82  | Ube2l6         | 1.315296 | 642.5113 | 1.37E-139           | RT1-CE10       | 1.360836 | 501.7284 | 4.51E-109 | Irf7          | 1.08055  | 311.9192 | 1.26E-67  | Actb          | 0.483308 | 182.9373 | 2.67E-39  | Actb         | 0.483308 | 182.9373 | 2.67E-39  |
| Rpl19          | 0.468611 | 897.4405 | 2.26E-193 | Rtp4           | 1.302537 | 634.1811 | 8.76E-138           | Psm1           | 1.340417 | 1021.262 | 9.05E-222 | Ube2l6        | 1.061421 | 398.677  | 2.09E-86  | Ddx46         | 0.47764  | 96.50498 | 8.17E-21  | Ddx46        | 0.47764  | 96.50498 | 8.17E-21  |
| Rn9            | 0.464983 | 604.5902 | 1.44E-130 | Jun            | 1.286457 | 525.9205 | 2.62E-114           | Il18bp         | 1.26721  | 361.5296 | 9.78E-79  | Mx2           | 1.038603 | 266.9088 | 6.17E-58  | Srsf3         | 0.458502 | 162.2032 | 7.49E-35  | Srsf3        | 0.458502 | 162.2032 | 7.49E-35  |
| Rn28s          | 0.453445 | 86.32168 | 1.22E-18  | Tapbp          | 1.2494   | 498.1201 | 2.75E-108           | Ifitm3         | 1.250747 | 344.6154 | 5.25E-34  | Parp9         | 1.034129 | 424.4448 | 5.66E-92  | Cltc          | 0.455541 | 119.0205 | 1.37E-25  | Cltc         | 0.455541 | 119.0205 | 1.37E-25  |
| Fdps           | 0.451186 | 98.42879 | 2.94E-21  | Manf           | 1.231431 | 678.4698 | 2.35E-147           | Tmem140        | 1.24873  | 427.9564 | 4.25E-93  | Serping1      | 1.03107  | 424.4448 | 5.66E-92  | Ppp4r2        | 0.454125 | 88.83607 | 3.39E-19  | Ppp4r2       | 0.454125 | 88.83607 | 3.39E-19  |
| Rps7           | 0.449394 | 578.6    | 5.70E-125 | Fos            | 1.23125  | 446.86   | 3.50E-97            | Rn28s          | 1.172863 | 614.064  | 2.04E-133 | Cd74          | 1.030687 | 124.5661 | 3.52E-27  | Eif3c         | 0.45358  | 118.2181 | 2.03E-25  | Eif3c        | 0.45358  | 118.2181 | 2.03E-25  |
| Rps15a         | 0.447777 | 701.7553 | 1.59E-151 | Pheta2         | 1.212015 | 629.6989 | 8.18E-137           | Wnt4           | 1.159767 | 878.0993 | 1.05E-190 | Prrs1         | 1.019421 | 180.261  | 3.32E-39  | Map1b         | 0.453139 | 205.9775 | 3.07E-44  | Map1b        | 0.453139 | 205.9775 | 3.07E-44  |
| Rpl28          | 0.445566 | 486.357  | 4.72E-105 | Bst2           | 1.2013   | 465.1299 | 3.95E-101           | Tapbp          | 1.151512 | 294.6653 | 2.89E-64  | Ifitm1        | 0.984748 | 228.9286 | 1.01E-49  | Acin1         | 0.449936 | 85.09622 | 2.09E-18  | Acin1        | 0.449936 | 85.09622 | 2.09E-18  |
| Atp5pd         | 0.444719 | 273.8039 | 3.78E-59  | Ifitm3         | 1.177257 | 152.0089 | 2.33E-33            | Oasl2          | 1.149678 | 307.5694 | 4.66E-67  | Lgals3bp      | 0.941501 | 260.4235 | 1.58E-56  | Igtp          | 0.448597 | 102.5559 | 4.25E-22  | Igtp         | 0.448597 | 102.5559 | 4.25E-22  |
| Rpl26          | 0.441516 | 625.9336 | 4.09E-135 | Irf7           | 1.162993 | 419.9875 | 2.36E-91            | Bst2           | 1.142871 | 296.5926 | 1.10E-64  | Igtp          | 0.934218 | 268.2724 | 3.19E-58  | Rn18s         | 0.447252 | 372.0073 | 4.24E-22  | Rn18s        | 0.447252 | 372.0073 | 4.24E-22  |
| Rp15           | 0.44107  | 293.6835 | 1.89E-63  | Mx2            | 1.162376 | 402.4517 | 1.52E-87            | Hspa1a         | 1.132056 | 254.9273 | 1.16E-55  | Psm1          | 0.929518 | 750.9415 | 1.26E-162 | Supt16h       | 0.443802 | 83.64232 | 4.16E-18  | Supt16h      | 0.443802 | 83.64232 | 4.16E-18  |
| Rpl31          | 0.439411 | 249.6438 | 6.22E-54  | Tmem140        | 1.16157  | 547.3605 | 5.95E-119           | Pkm            | 1.129479 | 401.9025 | 1.87E-87  | Irf7          | 0.927287 | 271.6283 | 6.04E-59  | Taok3         | 0.442669 | 95.44586 | 1.37E-20  | Taok3        | 0.442669 | 95.44586 | 1.37E-20  |
| Rps23          | 0.437529 | 605.0497 | 1.27E-130 | Parp9          | 1.158889 | 489.472  | 2.06E-106           | Psm2           | 1.125725 | 446.6319 | 3.80E-97  | Ppy           | 0.918317 | 298.1338 | 1.15E-64  | Sy5f          | 0.441116 | 73.22722 | 6.47E-16  | Sy5f         | 0.441116 | 73.22722 | 6.47E-16  |
| Hmt1           | 0.436225 | 369.2648 | 7.37E-80  | Oasl2          | 1.156473 | 452.1001 | 2.58E-98            | Rpl5           | 1.117289 | 2052.338 | 0         | Pdgfra        | 0.915198 | 282.8832 | 2.32E-61  | Golg1b        | 0.437969 | 83.8783  | 3.75E-18  | Golg1b       | 0.437969 | 83.8783  | 3.75E-18  |
| Rps5           | 0.43551  | 443.6513 | 6.54E-96  | Prrs1          | 1.147418 | 271.1343 | 3.99E-59            | Rpl20          | 1.108872 | 368.0102 | 3.98E-80  | Tmem140       | 0.906938 | 332.6832 | 4.11E-72  | Vegfa         | 0.437046 | 78.66746 | 4.86E-17  | Vegfa        | 0.437046 | 78.66746 | 4.86E-17  |
| Cox5b          | 0.434329 | 232.1764 | 3.82E-50  | Cd74           | 1.142028 | 211.9199 | 2.64E-46            | Fosb           | 1.102999 | 229.3337 | 3.85E-50  | Manf          | 0.901651 | 363.6855 | 7.98E-79  | Actb          | 0.433614 | 455.0656 | 4.95E-98  | Actb         | 0.433614 | 455.0656 | 4.95E-98  |
| Rps13          | 0.432738 | 483.828  | 1.61E-104 | Ctrb1          | 1.124897 | 250.3936 | 1.21E-54            | Il18bp         | 1.095185 | 274.5575 | 6.53E-60  | Parp14        | 0.883502 | 232.228  | 2.01E-50  | Ncl           | 0.431816 | 121.0926 | 4.95E-26  | Ncl          | 0.431816 | 121.0926 | 4.95E-26  |
| Cish           | 0.432638 | 80.63879 | 2.00E-17  | Il18bp         | 1.10608  | 401.8383 | 2.05E-87            | Cd74           | 1.094763 | 141.0175 | 4.26E-31  | Neur13        | 0.867456 | 197.9223 | 5.19E-43  | Chgb          | 0.430309 | 211.309  | 2.26E-45  | Chgb         | 0.430309 | 211.309  | 2.26E-45  |
| Wnt4           | 0.432128 | 122.6914 | 1.78E-26  | Psm2           | 1.069616 | 595.3093 | 2.34E-129           | Pheta2         |          |          |           |               |          |          |           |               |          |          |           |              |          |          |           |

**KRV11 vs pIC11**

| Term                                                                              | Count | %    | P-Value  | Benjamini |
|-----------------------------------------------------------------------------------|-------|------|----------|-----------|
| defense response                                                                  | 9     | 17.6 | 2.80E-13 | 1.00E-10  |
| cellular response to interferon-beta                                              | 7     | 13.7 | 2.70E-10 | 5.00E-08  |
| defense response to virus                                                         | 9     | 17.6 | 9.20E-10 | 1.10E-07  |
| response to virus                                                                 | 7     | 13.7 | 5.30E-08 | 4.90E-06  |
| positive regulation of T cell mediated cytotoxicity                               | 5     | 9.8  | 1.30E-07 | 9.60E-06  |
| negative regulation of viral genome replication                                   | 5     | 9.8  | 9.00E-07 | 5.60E-05  |
| response to mechanical stimulus                                                   | 6     | 11.8 | 6.00E-06 | 3.20E-04  |
| antigen processing and presentation of endogenous peptide antigen via MHC class I | 3     | 5.9  | 9.20E-05 | 4.20E-03  |
| response to cytokine                                                              | 5     | 9.8  | 1.10E-04 | 4.50E-03  |
| response to type I interferon                                                     | 3     | 5.9  | 1.30E-04 | 4.70E-03  |

**KRV11 vs PBS11**

| Term                                                                              | Count | %    | P-Value  | Benjamini |
|-----------------------------------------------------------------------------------|-------|------|----------|-----------|
| defense response                                                                  | 8     | 15.7 | 2.60E-11 | 1.10E-08  |
| cellular response to interferon-beta                                              | 7     | 13.7 | 2.70E-10 | 5.70E-08  |
| defense response to virus                                                         | 8     | 15.7 | 2.90E-08 | 4.10E-06  |
| response to virus                                                                 | 6     | 11.8 | 1.90E-06 | 2.00E-04  |
| positive regulation of T cell mediated cytotoxicity                               | 4     | 7.8  | 1.40E-05 | 1.20E-03  |
| immune response                                                                   | 7     | 13.7 | 5.10E-05 | 3.50E-03  |
| negative regulation of viral genome replication                                   | 4     | 7.8  | 5.70E-05 | 3.50E-03  |
| antigen processing and presentation of endogenous peptide antigen via MHC class I | 3     | 5.9  | 9.20E-05 | 4.70E-03  |
| antigen processing and presentation of peptide antigen via MHC class I            | 4     | 7.8  | 9.90E-05 | 4.70E-03  |
| response to interferon-beta                                                       | 3     | 5.9  | 2.20E-04 | 9.40E-03  |

**KRV11 vs KRV9**

| Term                                                                   | Count | %    | P-Value  | Benjamini |
|------------------------------------------------------------------------|-------|------|----------|-----------|
| cellular response to interferon-beta                                   | 6     | 20   | 2.20E-09 | 5.30E-07  |
| defense response                                                       | 6     | 20   | 1.20E-08 | 1.40E-06  |
| defense response to virus                                              | 6     | 20   | 1.60E-06 | 1.30E-04  |
| response to type I interferon                                          | 3     | 10   | 5.10E-05 | 3.10E-03  |
| response to virus                                                      | 4     | 13.3 | 3.00E-04 | 1.40E-02  |
| immune response                                                        | 5     | 16.7 | 8.10E-04 | 3.20E-02  |
| negative regulation of viral genome replication                        | 3     | 10   | 1.00E-03 | 3.60E-02  |
| antigen processing and presentation of peptide antigen via MHC class I | 3     | 10   | 1.50E-03 | 4.50E-02  |
| antigen processing and presentation                                    | 3     | 10   | 1.80E-03 | 4.90E-02  |

**KRV11 vs KRV7**

| Term                                                                              | Count | %    | P-Value  | Benjamini |
|-----------------------------------------------------------------------------------|-------|------|----------|-----------|
| cellular response to interferon-beta                                              | 7     | 17.9 | 5.20E-11 | 1.50E-08  |
| defense response                                                                  | 7     | 17.9 | 3.90E-10 | 5.60E-08  |
| defense response to virus                                                         | 6     | 15.4 | 4.50E-06 | 4.30E-04  |
| antigen processing and presentation of endogenous peptide antigen via MHC class I | 3     | 7.7  | 5.40E-05 | 3.90E-03  |
| response to type I interferon                                                     | 3     | 7.7  | 7.60E-05 | 4.40E-03  |
| innate immune response                                                            | 6     | 15.4 | 1.40E-04 | 6.60E-03  |
| response to virus                                                                 | 4     | 10.3 | 5.30E-04 | 2.20E-02  |
| positive regulation of T cell mediated cytotoxicity                               | 3     | 7.7  | 6.10E-04 | 2.20E-02  |
| negative regulation of viral genome replication                                   | 3     | 7.7  | 1.50E-03 | 4.90E-02  |
| immune response                                                                   | 5     | 12.8 | 1.70E-03 | 4.90E-02  |

| hot vs cool KRV11 | logFC    | LR       | pAdj      | hot vs nonKRV | logFC    | LR       | pAdj      | cool KRV11 vs nonKRV | logFC    | LR       | pAdj      |  | pathway# |
|-------------------|----------|----------|-----------|---------------|----------|----------|-----------|----------------------|----------|----------|-----------|--|----------|
| Ubd               | 6.094292 | 2350.674 | 0         | Ubd           | 6.266835 | 3156.826 | 0         | LOC100911498         | 3.055557 | 3318.039 | 0         |  |          |
| LOC100910973      | 5.475996 | 5398.222 | 0         | LOC100910973  | 5.974383 | 7263.087 | 0         | Zbed5                | 1.581131 | 1846.192 | 0         |  | 1        |
| Cxcl10            | 4.676421 | 945.0993 | 9.50E-205 | Cxcl10        | 4.796699 | 1270.047 | 1.63E-275 | RT1-CE5              | 1.504661 | 639.8495 | 9.72E-139 |  | 2        |
| Isg15             | 4.593109 | 3038.746 | 0         | Isg15         | 4.496636 | 3373.042 | 0         | Hspa1a               | 1.185735 | 330.1981 | 1.36E-71  |  | 3        |
| MGC108823         | 3.312746 | 2125.696 | 0         | B2m           | 3.92581  | 8325.024 | 0         | Prss1                | 1.180457 | 197.4035 | 7.22E-43  |  | 4        |
| Psmb8             | 3.067099 | 3398.986 | 0         | MGC108823     | 3.881385 | 3078.351 | 0         | Fosb                 | 1.157797 | 314.9913 | 2.54E-68  |  | 5        |
| Tap1              | 3.015577 | 2104.041 | 0         | Psmb8         | 3.751076 | 4910.66  | 0         | Ctrb1                | 1.144534 | 173.5195 | 1.02E-37  |  | 6        |
| Gbp2              | 3.001255 | 1048.346 | 3.60E-227 | Tap1          | 3.706893 | 3150.252 | 0         | Pheta2               | 1.078685 | 354.5342 | 7.15E-77  |  | 7        |
| B2m               | 2.900845 | 4001.763 | 0         | Psmb9         | 3.617726 | 4035.71  | 0         | Rn18s                | 1.072704 | 1623.98  | 0         |  | 8        |
| Psmb9             | 2.843581 | 2660.44  | 0         | Ifi27         | 3.314815 | 1073.411 | 6.59E-233 | RT1-A1               | 1.06527  | 327.3239 | 5.54E-71  |  | 9        |
| Psmb10            | 2.842355 | 2443.942 | 0         | RT1-CE5       | 3.198025 | 1977.065 | 0         | Fos                  | 1.055117 | 251.2984 | 1.46E-54  |  | 10       |
| Ifitm3            | 2.768597 | 505.8716 | 1.48E-109 | Stat1         | 3.087734 | 2265.735 | 0         | B2m                  | 1.024965 | 830.1355 | 7.26E-180 |  | 11       |
| Ifi2712b          | 2.606944 | 2513.268 | 0         | Gbp2          | 3.049735 | 1257.662 | 7.74E-273 | Manf                 | 0.97428  | 307.466  | 1.08E-66  |  |          |
| Ifi27             | 2.571703 | 542.3175 | 1.86E-117 | LOC100911498  | 3.038023 | 1946.594 | 0         | Amy2a3               | 0.919503 | 98.46114 | 1.66E-21  |  |          |
| RT1-S3            | 2.567496 | 1417.102 | 3.73E-307 | Irf1          | 3.033034 | 1495.67  | 0         | Pkm                  | 0.901875 | 268.2163 | 3.36E-58  |  |          |
| Stat1             | 2.558504 | 1564.393 | 0         | Irgm          | 2.956714 | 1717.832 | 0         | Rn45s                | 0.899522 | 1553.766 | 0         |  | 1        |
| Mx2               | 2.517837 | 921.8759 | 1.01E-199 | Psmb10        | 2.928873 | 2753.348 | 0         | Cope                 | 0.847712 | 229.8206 | 6.60E-50  |  | 2        |
| Irgm              | 2.490701 | 1169.985 | 1.65E-253 | Ifi47         | 2.896964 | 1645.099 | 0         | Eef1a1               | 0.833654 | 2248.009 | 0         |  | 3        |
| Cd74              | 2.486455 | 398.7888 | 2.57E-86  | RT1-S3        | 2.883803 | 1841.126 | 0         | Wnt4                 | 0.77744  | 444.241  | 2.61E-96  |  | 4        |
| Ifi47             | 2.485946 | 1139.326 | 7.13E-247 | Ifitm3        | 2.772075 | 580.6907 | 5.45E-126 | Psmb9                | 0.774145 | 185.07   | 3.36E-40  |  | 5        |
| Irf7              | 2.364748 | 810.0644 | 1.68E-175 | Serping1      | 2.751093 | 2268.889 | 0         | Mrps28               | 0.75852  | 170.0085 | 5.81E-37  |  | 6        |
| Irf1              | 2.359651 | 831.2088 | 4.41E-180 | RT1-A1        | 2.682389 | 1276.911 | 5.44E-277 | Snhg11               | 0.750132 | 631.4815 | 6.16E-137 |  | 7        |
| Oasl2             | 2.34436  | 848.4338 | 8.59E-184 | Cd74          | 2.602073 | 546.1838 | 1.64E-118 | Tmau1ap              | 0.747402 | 170.1945 | 5.33E-37  |  | 9        |
| Rtp4              | 2.321597 | 901.3993 | 2.74E-195 | Rtp4          | 2.601037 | 1242.786 | 1.28E-269 | Ifi27                | 0.743112 | 99.91283 | 8.18E-22  |  | 8        |
| Tapbp             | 2.271124 | 1081.448 | 2.42E-234 | Mx2           | 2.569709 | 1051.638 | 3.38E-228 | Rpl5                 | 0.741526 | 965.8979 | 2.86E-209 |  | 12       |
| Ifitm1            | 2.239239 | 565.5205 | 1.76E-122 | Tapbp         | 2.566322 | 1422.292 | 0.00E-000 | Cela2a               | 0.738906 | 98.46287 | 1.66E-21  |  | 10       |
| Serping1          | 2.224129 | 1502.339 | 0         | Oasl2         | 2.556602 | 1128.031 | 9.87E-245 | Eef2                 | 0.733332 | 719.2159 | 7.33E-156 |  |          |
| RGD1309362        | 2.208519 | 708.8869 | 1.41E-153 | Ifi18bp       | 2.434637 | 1176.538 | 3.00E-255 | Tmem106c             | 0.723902 | 165.7705 | 4.81E-36  |  |          |
| Ifi18bp           | 2.092108 | 839.4009 | 7.59E-182 | Ifitm1        | 2.386623 | 755.2484 | 6.82E-164 | Rn28s                | 0.706989 | 252.2529 | 9.19E-55  |  |          |
| Neur13            | 2.090512 | 436.9678 | 1.39E-94  | Bst2          | 2.385662 | 1106.299 | 5.08E-240 | Tap1                 | 0.691315 | 148.0886 | 3.21E-32  |  | 12       |
| Bst2              | 2.072874 | 801.273  | 1.32E-173 | Irf7          | 2.343711 | 857.6813 | 4.11E-186 | LOC108348108         | 0.68555  | 129.6435 | 2.99E-28  |  |          |
| Psme2             | 1.986828 | 1398.967 | 3.04E-303 | RGD1309362    | 2.278584 | 870.9159 | 5.56E-189 | Psmb8                | 0.683978 | 156.2392 | 5.52E-34  |  |          |
| Usp18             | 1.983299 | 588.497  | 1.86E-127 | Psme2         | 2.253594 | 1817.703 | 0         | Pnma8b               | 0.675074 | 158.3927 | 1.90E-34  |  |          |
| Parp14            | 1.952839 | 591.206  | 5.07E-128 | Ube216        | 2.219275 | 1083.129 | 5.22E-235 | Agt                  | 0.675044 | 99.31632 | 1.10E-21  |  | 12       |
| Ifit3             | 1.902274 | 426.3387 | 2.69E-92  | Parp14        | 2.174047 | 784.99   | 2.42E-170 | Irf1                 | 0.673383 | 134.5496 | 2.64E-29  |  | 13       |
| Parp9             | 1.900169 | 590.4179 | 7.31E-128 | Psme1         | 2.169622 | 2914.408 | 0         | Hspa1b               | 0.671735 | 111.3574 | 2.68E-24  |  | 14       |
| Lgals3bp          | 1.894679 | 555.4016 | 2.72E-120 | Tmem140       | 2.157376 | 1056.133 | 3.66E-229 | Igfbp4               | 0.659768 | 285.8584 | 5.04E-62  |  | 15       |
| Igtp              | 1.871835 | 532.8301 | 2.11E-115 | Parp9         | 2.151588 | 809.1897 | 1.38E-175 | Ckb                  | 0.646067 | 87.1794  | 4.49E-19  |  |          |
| Phf11             | 1.862082 | 508.2687 | 4.54E-110 | Igtp          | 2.145762 | 760.7065 | 4.52E-165 | Podxl2               | 0.643693 | 166.5074 | 3.36E-36  |  |          |
| Pyy               | 1.846528 | 156.2866 | 9.39E-34  | Neur13        | 2.145731 | 551.616  | 1.10E-119 | Rpl3                 | 0.639767 | 820.3033 | 9.61E-178 |  |          |
| Ube216            | 1.803713 | 711.9941 | 3.08E-154 | Ifi2712b      | 2.139247 | 1916.697 | 0         | Hspe1                | 0.633081 | 166.2189 | 3.86E-36  |  |          |
| RT1-A2            | 1.773798 | 694.1187 | 2.23E-150 | Lgals3bp      | 2.084667 | 716.2701 | 1.93E-155 | Elf3f                | 0.629077 | 271.3892 | 6.97E-59  |  |          |
| Isg20             | 1.772148 | 774.6636 | 7.77E-168 | Isg20         | 2.084515 | 1100.003 | 1.15E-238 | Matb                 | 0.626536 | 352.8228 | 1.67E-76  |  |          |
| RT1-CE10          | 1.753621 | 728.1642 | 9.69E-158 | RT1-A2        | 1.981772 | 902.9268 | 6.38E-196 | Jun                  | 0.623704 | 94.68162 | 1.08E-20  |  |          |
| Psme1             | 1.734521 | 1885.102 | 0         | Usp18         | 1.933776 | 594.3389 | 6.05E-129 | Slc30a8              | 0.618513 | 121.0499 | 2.17E-26  |  |          |
| Pla2g16           | 1.718154 | 376.3973 | 1.82E-81  | Ifit3         | 1.917057 | 503.1457 | 3.49E-109 | Rpl7a                | 0.609052 | 864.5863 | 2.44E-187 |  |          |
| Stat2             | 1.696038 | 434.6089 | 4.44E-94  | RT1-CE10      | 1.892297 | 890.0372 | 3.96E-193 | Tmem109              | 0.593799 | 137.446  | 6.36E-30  |  |          |

| Term                                                | Count | %    | P-Value  | Benjamini |
|-----------------------------------------------------|-------|------|----------|-----------|
| positive regulation of T cell mediated cytotoxicity | 4     | 8.2  | 1.00E-05 | 4.70E-03  |
| response to unfolded protein                        | 4     | 8.2  | 2.40E-05 | 5.60E-03  |
| response to mechanical stimulus                     | 5     | 10.2 | 9.10E-05 | 1.40E-02  |
| protein refolding                                   | 3     | 6.1  | 2.30E-04 | 2.60E-02  |

| alpha cell DE pathways |          |                                                              |
|------------------------|----------|--------------------------------------------------------------|
| pathway#               | Symbol   | description                                                  |
| 1                      | Gbp2     | guanylate binding protein 2(Gbp2)                            |
|                        | Irgm     | immunity-related GTPase M(Irgm)                              |
|                        | Ifi47    | interferon gamma inducible protein 47(Ifi47)                 |
|                        | Irf1     | interferon regulatory factor 1(Irf1)                         |
|                        | Stat1    | signal transducer and activator of transcription 1(Stat1)    |
|                        | MGC10882 | similar to interferon-inducible GTPase(MGC108823)            |
|                        | RGD13093 | similar to interferon-inducible GTPase(RGD1309362)           |
| 2                      | Cd74     | CD74 molecule(Cd74)                                          |
|                        | Tapbp    | TAP binding protein(Tapbp)                                   |
|                        | Irgm     | immunity-related GTPase M(Irgm)                              |
|                        | Ifi47    | interferon gamma inducible protein 47(Ifi47)                 |
|                        | MGC10882 | similar to interferon-inducible GTPase(MGC108823)            |
|                        | RGD13093 | similar to interferon-inducible GTPase(RGD1309362)           |
|                        | Tap1     | transporter 1, ATP binding cassette subfamily 8 member(Tap1) |
| 3                      | Oasl2    | 2'-5' oligoadenylate synthetase-like 2(Oasl2)                |
|                        | Cxcl10   | C-X-C motif chemokine ligand 10(Cxcl10)                      |
|                        | Isg15    | ISG15 ubiquitin-like modifier(Isg15)                         |
|                        | Mx2      | MX dynamin like GTPase 2(Mx2)                                |
|                        | Bst2     | bone marrow stromal cell antigen 2(Bst2)                     |
|                        | Ifitm1   | interferon induced transmembrane protein 1(Ifitm1)           |
|                        | Ifitm3   | interferon induced transmembrane protein 3(Ifitm3)           |
| 4                      | Oasl2    | 2'-5' oligoadenylate synthetase-like 2(Oasl2)                |
|                        | Cxcl10   | C-X-C motif chemokine ligand 10(Cxcl10)                      |
|                        | Mx2      | MX dynamin like GTPase 2(Mx2)                                |
|                        | Bst2     | bone marrow stromal cell antigen 2(Bst2)                     |
|                        | Ifitm1   | interferon induced transmembrane protein 1(Ifitm1)           |
|                        | Ifitm3   | interferon induced transmembrane protein 3(Ifitm3)           |
|                        | Irf1     | interferon regulatory factor 1(Irf1)                         |
| 5                      | Isg15    | ISG15 ubiquitin-like modifier(Isg15)                         |
|                        | Mx2      | MX dynamin like GTPase 2(Mx2)                                |
|                        | Bst2     | bone marrow stromal cell antigen 2(Bst2)                     |
|                        | Ifitm3   | interferon induced transmembrane protein 3(Ifitm3)           |
|                        |          |                                                              |
| 6                      | Tapbp    | TAP binding protein(Tapbp)                                   |
|                        | B2m      | beta-2 microglobulin(B2m)                                    |
|                        | Tap1     | transporter 1, ATP binding cassette subfamily 8 member(Tap1) |
| 7                      | Isg15    | ISG15 ubiquitin-like modifier(Isg15)                         |
|                        | Mx2      | MX dynamin like GTPase 2(Mx2)                                |
|                        | Stat1    | signal transducer and activator of transcription 1(Stat1)    |

| pIC11 vs PBS11 |          |          | KRV11 vs pIC11 |              |          | KRV11 vs PBS11 |           |              | KRV11 vs KRV9 |          |           | KRV11 vs KRV7 |          |          | KRV9 vs KRV7 |              |           |          |           |
|----------------|----------|----------|----------------|--------------|----------|----------------|-----------|--------------|---------------|----------|-----------|---------------|----------|----------|--------------|--------------|-----------|----------|-----------|
| logFC          | LR       | pAdj     | logFC          | LR           | pAdj     | logFC          | LR        | pAdj         | logFC         | LR       | pAdj      | logFC         | LR       | pAdj     | logFC        | LR           | pAdj      |          |           |
| S100a9         | 5.171109 | 38.81082 | 1.75E-07       | Ubd          | 5.815186 | 153.6006       | 1.02E-32  | LOC100911498 | 4.299757      | 514.5109 | 3.89E-110 | Ubd           | 5.265069 | 139.8969 | 7.89E-29     | Ubd          | 3.26037   | 50.72769 | 1.27E-05  |
| S100a8         | 4.534577 | 34.43843 | 1.37E-06       | Cxcl11       | 4.556525 | 135.9356       | 6.10E-29  | LOC100911498 | 3.700675      | 66.9501  | 7.05E-14  | Cxcl11        | 4.93843  | 111.1358 | 1.31E-23     | Cxcl9        | 2.984164  | 30.12267 | 1.36E-09  |
| Camp           | 1.798761 | 9.994525 | 0.0381806      | Cc10         | 4.235504 | 432.0173       | 1.71E-92  | Cc10         | 2.975389      | 30.42896 | 1.73E-06  | Cc10          | 4.115875 | 125.712  | 1.15E-26     | LOC100911498 | 2.346655  | 100.9723 | 1.07E-19  |
| Gamm           | 1.713210 | 15.97074 | 0.0043392      | Cxcl10       | 4.231373 | 122.7484       | 3.97E-26  | Cxcl10       | 2.856277      | 66.3386  | 5.88E-14  | Fabp4         | 3.911757 | 50.8898  | 7.92E-11     | Cxcl10       | 2.351556  | 24.99188 | 0.000144  |
| F13a1          | 1.575963 | 14.13083 | 0.0076785      | Cxcl9        | 3.887065 | 121.9799       | 5.49E-26  | Cc10         | 2.663756      | 87.3197  | 2.13E-18  | Ass1          | 3.813628 | 123.4623 | 3.21E-26     | Ass1         | 1.611776  | 11.42025 | 0.041865  |
| Ncp            | 1.418624 | 11.499   | 0.021687       | Ass1         | 3.707249 | 101.1493       | 1.45E-21  | Ly6c         | 2.556578      | 49.38361 | 2.03E-10  | Cxcl9         | 3.684645 | 124.2941 | 2.17E-26     | Fabp5        | 1.483122  | 33.31418 | 0.0002777 |
| Cc16           | 1.357319 | 48.79971 | 2.44E-09       | Gbp2         | 3.649574 | 188.183        | 5.38E-40  | Gmb          | 2.27693       | 28.83741 | 3.70E-06  | Gmb           | 3.622575 | 182.4881 | 8.50E-39     | MGC105649    | 1.390709  | 30.8171  | 1.25E-05  |
| LOC685157      | 1.141242 | 26.483   | 3.87E-05       | RT1-CE5      | 3.253025 | 448.8422       | 4.95E-96  | Gmb          | 2.363399      | 15.01944 | 0.0002722 | Igfb1         | 3.461598 | 36.32789 | 8.05E-08     | Ass1         | 1.378775  | 19.25937 | 0.0018489 |
| Pglyrp1        | 1.016073 | 9.50201  | 0.0463024      | Sod2         | 3.220003 | 161.0727       | 2.62E-34  | Fabp5        | 2.727289      | 16.1079  | 0.0012916 | Igfb1         | 2.903943 | 101.0708 | 1.81E-21     | Cxcl3        | 1.206522  | 65.10178 | 2.05E-12  |
| Gapt           | 0.962797 | 14.64783 | 0.002762       | LOC100910973 | 2.995346 | 106.3699       | 3.62E-75  | Ubd          | 1.943894      | 24.2181  | 4.22E-05  | Sod2          | 2.708698 | 124.5539 | 1.95E-26     | Dnasel13     | 1.158967  | 19.95212 | 0.0137318 |
| Alxa5ap        | 0.943626 | 24.28683 | 0.0001046      | Pla2g16      | 2.903350 | 165.0955       | 3.87E-35  | Gbp2         | 2.165167      | 97.07007 | 1.92E-20  | LOC100911498  | 2.70816  | 258.5088 | 5.28E-55     | Serpinb6b    | 1.141627  | 21.77024 | 0.0005612 |
| Nkg7           | 0.897475 | 9.515373 | 0.0460591      | Ly6c         | 2.898088 | 57.38112       | 2.64E-12  | RT1-CE5      | 3.817116      | 80.62767 | 1.15E-26  | Gbp2          | 2.743518 | 18.84853 | 0.0002983    | Mir147       | 1.114458  | 22.73014 | 0.0003635 |
| Ctsw           | 0.889494 | 10.94918 | 0.0269217      | Rpl1         | 2.85692  | 17.60828       | 0.0004391 | Rpl1         | 2.014228      | 215.8441 | 7.14E-46  | Cc15          | 2.473518 | 18.84853 | 0.0002983    | Serpinb9     | 1.104336  | 23.85848 | 0.0002394 |
| Il16           | 0.886353 | 10.97358 | 0.009277       | Fabp5        | 2.847196 | 104.9359       | 2.21E-22  | Irf1         | 1.892007      | 22.29269 | 0.0001036 | Upp1          | 2.409191 | 33.56751 | 3.01E-07     | Csrp1        | 1.012427  | 22.99717 | 0.0003218 |
| Tf             | 0.853151 | 18.22136 | 0.0013611      | Fabp5        | 2.824798 | 14.89571       | 0.0015664 | Serpinb6b    | 1.925036      | 41.51631 | 8.37E-09  | Cnn3          | 1.796088 | 74.39866 | 2.15E-15     | Hspa1b       | 0.96835   | 14.47252 | 0.0138859 |
| Cf             | 0.814595 | 15.42057 | 0.0042006      | Igfb1        | 2.714316 | 78.30542       | 1.03E-16  | Ptprcap      | 1.905855      | 60.73052 | 8.54E-13  | Ckd1na        | 1.733865 | 55.96483 | 1.45E-11     | LOC108348108 | 0.966551  | 15.90739 | 0.0175337 |
| Cd3g           | 0.810084 | 11.53821 | 0.021473       | RT1-A1       | 2.702646 | 267.8055       | 5.63E-57  | Ifttm1       | 1.770696      | 80.18689 | 6.67E-17  | Bcat1         | 1.726651 | 73.34959 | 3.56E-15     | Socs1        | 0.95921   | 15.48323 | 0.00912   |
| Coro3a         | 0.800815 | 29.8783  | 9.73E-06       | LOC691141    | 2.587152 | 121.4212       | 1.73E-26  | Pla2g16      | 1.741214      | 10.08012 | 5.84E-19  | Cxcl10        | 1.999592 | 44.29333 | 1.70E-09     | Ctse         | 0.93579   | 14.29095 | 0.0307471 |
| Il4r           | 0.792834 | 16.94917 | 0.0033619      | Fcgr3a       | 2.578354 | 141.6957       | 3.85E-30  | Fcgr3a       | 1.733947      | 55.76394 | 9.50E-12  | Acd5          | 1.701957 | 38.66426 | 4.76E-08     | Rala         | 0.934174  | 22.40175 | 0.0004241 |
| Tspan8         | 0.791352 | 16.65957 | 0.0025326      | C2           | 2.569664 | 155.6838       | 3.82E-33  | Socs1        | 1.733627      | 57.41004 | 4.20E-12  | Zeb1          | 1.701267 | 206.6095 | 2.97E-43     | Sdc4         | 0.885724  | 12.13625 | 0.035482  |
| IFitga45       | 0.780035 | 18.37265 | 0.0012729      | Cp1          | 2.459132 | 134.2806       | 1.27E-28  | Cp1          | 1.694971      | 41.88783 | 1.06E-08  | Mmp12         | 1.93272  | 20.7641  | 0.0001233    | Pla2g16      | 0.873157  | 15.73975 | 0.0081356 |
| Rtg5           | 0.766611 | 11.34415 | 0.022997       | Irf8         | 2.449816 | 69.1714        | 8.61E-15  | Irf8         | 1.653336      | 13.09967 | 0.004738  | Igfb1         | 1.931216 | 47.85357 | 3.22E-10     | Upp1         | 0.86973   | 16.95362 | 0.0048961 |
| Alfrng1        | 0.770167 | 20.04076 | 0.0006538      | Fcgr3a       | 2.447828 | 67.35082       | 1.28E-18  | Hck          | 1.65167       | 88.42822 | 1.24E-18  | Irfng         | 1.542227 | 10.46236 | 0.0215495    | Sept6        | 0.862472  | 16.42298 | 0.0061355 |
| Gpr183         | 0.698575 | 10.04322 | 0.0375148      | Mgp          | 2.409524 | 17.20826       | 0.0005345 | Ptgnp1       | 1.637074      | 81.52365 | 3.51E-17  | RGD1565410    | 1.523139 | 38.68541 | 4.74E-08     | Psmc2        | 0.84653   | 12.12087 | 5.79E-05  |
| Ly1            | 0.687696 | 11.43648 | 0.0220613      | Nampt        | 2.36502  | 104.2712       | 3.11E-22  | Il1b         | 1.628627      | 33.8572  | 3.35E-07  | Cdk1na        | 1.511434 | 67.82497 | 5.41E-14     | Selenop      | 0.832099  | 15.34016 | 0.0095216 |
| Rin3           | 0.671649 | 11.30051 | 0.0233541      | Txn1         | 2.321778 | 177.5489       | 1.01E-37  | Col3a1       | 1.624301      | 7.878097 | 0.0042724 | RT1-Bb        | 1.509338 | 96.76728 | 3.79E-23     | Rnh1         | 0.825441  | 25.46381 | 0.0001179 |
| Lsp1           | 0.632135 | 10.50482 | 0.0317435      | Stat1        | 2.298391 | 133.8734       | 1.49E-28  | Gadd45b      | 1.605509      | 51.26521 | 8.31E-11  | Plac8         | 1.470131 | 45.53421 | 1.97E-09     | Plvap        | 0.823925  | 12.26119 | 0.0338874 |
| Fnbp1          | 0.549558 | 9.94372  | 0.0388317      | MGC105649    | 2.291481 | 86.15863       | 2.28E-18  | Upp1         | 1.554683      | 32.34951 | 6.91E-07  | Gadd45b       | 1.463577 | 50.8885  | 1.59E-10     | Rab7b        | 0.822236  | 13.01811 | 0.0247863 |
| Gpm3           | 0.537833 | 9.397478 | 0.0482242      | Ifi47        | 2.268261 | 135.8293       | 6.27E-29  | Sod2         | 1.357858      | 50.86039 | 1.01E-10  | Gadd45b       | 1.867594 | 65.0891  | 8.59E-14     | Psmb10       | 0.814879  | 27.17042 | 5.79E-05  |
| Alfrngb1b      | 0.524022 | 13.88244 | 0.0084245      | RT1-T24-4    | 2.253092 | 122.2177       | 4.97E-26  | RT1-Bb       | 1.446035      | 83.00794 | 1.74E-17  | Irf1          | 1.845044 | 65.12195 | 8.53E-14     | Cck134       | 0.805701  | 17.73022 | 0.0035281 |
| Gmg12          | 0.509942 | 10.43112 | 0.032493       | Psmc2        | 2.252039 | 197.2881       | 6.27E-42  | Zeb1         | 1.518832      | 138.7769 | 2.89E-29  | Irf7          | 1.840158 | 79.68549 | 7.20E-17     | Lcp1         | 0.803225  | 41.5877  | 7.63E-08  |
| Gpmg1b         | 0.495858 | 12.64988 | 0.0137235      | Anxa3        | 2.211055 | 70.66099       | 4.15E-15  | Gpr31        | 1.504828      | 58.75484 | 2.18E-12  | Scin          | 1.416463 | 14.10734 | 0.0042318    | Pgt1         | 0.793241  | 21.52947 | 0.0006263 |
| Pnp1a7         | 0.480034 | 11.05774 | 0.0257175      | Lap3         | 2.152268 | 119.5309       | 1.78E-25  | Cd40         | 1.489992      | 46.65143 | 7.32E-10  | Timp1         | 1.414636 | 29.6107  | 3.49E-06     | Psmb9        | 0.785288  | 20.14817 | 0.0012125 |
| Sp1b           | 0.467187 | 12.37984 | 0.0153017      | Acd1         | 2.150763 | 49.2355        | 1.32E-10  | Acad10       | 1.475804      | 15.57814 | 0.0016454 | Rab20         | 1.40319  | 41.17046 | 1.47E-08     | Lap3         | 0.777604  | 16.76872 | 0.0052798 |
| Sna13          | 0.457164 | 12.04717 | 0.0175054      | B2m          | 2.080755 | 501.9759       | 2.04E-107 | Coro1a       | 1.467678      | 138.1436 | 3.79E-29  | Tgm2          | 1.383748 | 41.63032 | 1.20E-08     | Acadml       | 0.764867  | 13.29119 | 0.022229  |
| Rn18s          | 0.455276 | 13.19261 | 0.0111349      | Psmb8        | 2.075585 | 236.8013       | 2.51E-50  | Dnbl1        | 1.460117      | 83.7011  | 1.28E-17  | Manf          | 1.373708 | 65.59776 | 1.48E-13     | Cd86         | 0.759947  | 15.73557 | 0.0081356 |
| Rps1           | 0.395608 | 30.65766 | 6.77E-06       | Psmb9        | 2.071919 | 163.9789       | 6.53E-35  | Fbxo27       | 1.45647       | 43.11341 | 4.13E-09  | Plek          | 1.344101 | 57.75656 | 1.10E-15     | Clec9a       | 0.75576   | 13.11829 | 0.2042091 |
| Alxa12         | 0.389235 | 11.63095 | 0.0260048      | Il18bp       | 2.067909 | 81.23155       | 2.55E-17  | Il18bp       | 1.447814      | 68.38166 | 2.17E-14  | Marcksl1      | 1.311785 | 38.75749 | 4.61E-08     | Mphosph10    | 0.755073  | 15.33114 | 0.0095216 |
| Rpl13a         | 0.373882 | 24.88911 | 8.01E-05       | Cd40         | 2.040895 | 69.70409       | 6.23E-15  | RGD1565410   | 1.445725      | 27.1797  | 8.18E-06  | Gpr1          | 1.278415 | 80.74317 | 4.33E-17     | Cc15         | 0.744545  | 13.93981 | 0.0173718 |
| Rnd4s          | 0.362819 | 10.10660 | 0.0362166      | Upp1         | 2.017566 | 46.72239       | 4.51E-10  | Ptgnp1       | 1.42177       | 74.67156 | 1.00E-15  | Mx1           | 1.297804 | 35.3413  | 2.29E-07     | Thrap3       | 0.737739  | 15.30093 | 0.0095872 |
| Ardc3          | 0.339657 | 9.949514 | 0.038465       | RT1-Bb       | 2.003849 | 105.7377       | 1.49E-22  | RT1-Bb       | 1.410757      | 62.16132 | 4.32E-13  | RT1-CE5       | 1.293376 | 167.8747 | 3.64E-35     | Aph1a        | 0.742046  | 17.84887 | 0.0076826 |
| Rpl18a         | 0.271321 | 15.79254 | 0.0036186      | Gzmb         | 1.992548 | 12.11762       | 0.0055191 | Dnasel13     | 1.410569      | 24.45309 | 2.88E-05  | Cd40          | 1.292998 | 41.34236 | 1.36E-08     | H2afz        | 0.724982  | 20.76488 | 0.000919  |
| Rpl12          | 0.253239 | 10.35359 | 0.033351       | Plek         | 1.985614 | 106.5232       | 1.05E-22  | Marcksl1     | 1.400875      | 37.8243  | 4.91E-08  | Icam1         | 1.279471 | 48.43023 | 5.12E-10     | Ppp4r2       | 0.722393  | 13.18319 | 0.0233781 |
| Rps3           | 0.233087 | 10.42368 | 0.032439       | MGC108823    | 1.980888 | 83.52031       | 8.27E-18  | Plin2        | 1.386651      | 53.51709 | 2.87E-11  | Ifttm3        | 1.26908  | 32.65994 | 8.16E-07     | Mpp1         | 0.720945  | 15.03305 | 0.0109171 |
| Rpl14          | 0.225042 | 11.41807 | 0.0222203      | Cdk1na       | 1.969199 | 53.21213       | 1.96E-11  | Cxcl9        | 1.380863      | 19.16039 | 0.0003297 | Ch13l1        | 1.26851  | 19.74583 | 0.0003245    | Thumpd3      | 0.717098  | 14.50317 | 0.0138766 |
| Rps10          | 0.222352 | 10.78819 | 0.0284991      | Zeb1         | 1.944927 | 176.0684       | 1.83E-37  | Cc10         | 1.371928      | 31.38003 | 1.07E-06  | Dhs58         | 1.252862 | 42.24643 | 9.05E-09     | Serpinb9     | 0.7100923 | 54.95845 | 1.16E-11  |
| Rpl6           | 0.219771 | 13.44019 | 0.0095969      | Cnn3         | 1.929858 | 63.50234       | 1.36E-13  | Trk1         | 1.366538      | 36.99527 | 7.32E-08  | Cd3g          | 1.243439 | 39.36367 | 3.49E-08     | Cd3g         | 1.695567  | 28.0256  | 4.22E-06  |
| Rpl26          | 0.20777  | 9.731384 | 0.0460591      | Rn18s        | 1.91352  | 149.4453       | 1.28E-31  | Il18bp       | 1.323736      | 149.4453 | 1.28E-31  | Gpr1          | 1.689399 | 42.03142 | 2.09E-07     | Cc15         | 1.690916  | 18.82727 | 0.001615  |
| Rps2           | 0.24901  | 11.72345 | 0.0201156      | Tapb         | 1.906644 | 107.0527       | 8.33E-23  | Lst1         | 1.352562      | 35.1602  | 1.79E-07  | Prdx5         | 1.216923 | 63.3728  | 4.39E-13     | Fchs2d       | 0.697959  | 11.41182 | 0.0441865 |
| Cox41          | 0.29048  | 9.862304 | 0.0401584      | LOC360231    | 1.894894 | 84.80795       | 4.36E-18  | Gbp5         | 1.348808      | 33.3031  | 5.02E-07  | Cnp           |          |          |              |              |           |          |           |



|          |          |          |           |          |          |          |           |           |          |          |           |           |          |          |           |            |          |          |           |              |          |          |            |
|----------|----------|----------|-----------|----------|----------|----------|-----------|-----------|----------|----------|-----------|-----------|----------|----------|-----------|------------|----------|----------|-----------|--------------|----------|----------|------------|
| Tmsb10   | -0.47815 | 13.90211 | 0.0083691 | Parp14   | 1.550651 | 48.32365 | 2.07E-10  | Ubd       | 1.130554 | 8.877568 | 0.0294796 | Tabb4b    | 0.979588 | 27.65634 | 8.47E-06  | Gbp5       | 1.327276 | 28.00659 | 4.24E-06  | Psmel1       | 0.553997 | 30.92549 | 1.23E-05   |
| Ndufa13  | -0.48282 | 15.44449 | 0.0041876 | Manf     | 1.545326 | 58.25977 | 1.77E-12  | Aif1      | 1.114518 | 17.23622 | 5.32E-15  | Tspo      | 0.976077 | 48.70831 | 4.56E-10  | Ybrf1      | 1.322001 | 113.236  | 4.64E-24  | Fucal        | 0.551751 | 17.46894 | 0.0039966  |
| Adox1    | -0.48806 | 25.32257 | 6.55E-05  | Parp9    | 1.542394 | 49.92478 | 9.59E-11  | Col6a2    | 1.112996 | 14.22354 | 0.0029281 | Fdps      | 0.976048 | 28.47003 | 5.85E-06  | Tnfrsf14   | 1.320767 | 36.07673 | 9.05E-08  | Cyc1         | 0.5513   | 11.4991  | 0.00430657 |
| Atp5pf   | -0.48809 | 13.66542 | 0.0091728 | Cxcl13   | 1.542513 | 12.35397 | 0.0004674 | Arhgap45  | 1.111742 | 40.50569 | 1.32E-08  | Rybl5a1   | 0.966081 | 11.58522 | 0.0130017 | Timp1      | 1.318883 | 20.92421 | 0.0001153 | Ptgeb5       | 0.551    | 13.4028  | 0.0017321  |
| Pom1e    | -0.49396 | 10.36256 | 0.0032723 | Icam1    | 1.518063 | 45.65447 | 7.43E-10  | Sell      | 1.110358 | 28.51898 | 4.27E-06  | Eif4a1    | 0.965918 | 117.2741 | 2.27E-24  | Plecl3     | 1.317023 | 31.77855 | 4.35E-07  | Fam49b       | 0.550261 | 16.97837 | 0.0049897  |
| Ifi2     | -0.49525 | 9.372087 | 0.0487023 | Cd79b    | 1.515703 | 17.65981 | 0.0004286 | Alpk3     | 1.107126 | 56.85967 | 5.50E-12  | Ctla1     | 0.964608 | 17.91265 | 1.49E-16  | Ifitm1     | 1.312653 | 48.82258 | 8.45E-10  | Rbm3         | 0.54857  | 18.92715 | 0.0020831  |
| Pc       | -0.49564 | 13.73256 | 0.0089175 | Sema4d   | 1.503348 | 43.98652 | 1.67E-09  | Ccl6      | 1.106694 | 20.53221 | 0.0001757 | Cd9       | 0.961781 | 15.09468 | 0.0002728 | Pirc1      | 1.294684 | 39.92781 | 1.43E-08  | Bat2         | 0.548225 | 16.5815  | 0.0057035  |
| Sestd1   | -0.49584 | 13.73256 | 0.0089175 | RT1-A2   | 1.485883 | 133.9084 | 1.49E-28  | Oaf       | 1.105661 | 40.28278 | 1.16E-08  | Timm8a1   | 0.958881 | 28.00025 | 7.16E-06  | Birc3      | 1.291491 | 34.8954  | 1.60E-07  | RT1-Ddb1     | 0.543302 | 22.04164 | 0.0000495  |
| Ndufa5   | -0.49837 | 9.57188  | 0.0448435 | Tuba3a   | 1.478936 | 98.14649 | 6.31E-21  | Rac2      | 1.100207 | 53.67669 | 2.67E-11  | Mx2       | 0.950654 | 20.99724 | 0.0001829 | RGD1565410 | 1.289603 | 22.87794 | 4.63E-05  | Slc25a5      | 0.540133 | 17.12668 | 0.0046238  |
| Ndufa1   | -0.50145 | 10.33504 | 0.0335662 | RT1-S3   | 1.478875 | 57.0666  | 3.04E-12  | Bwz2      | 1.099447 | 30.24158 | 1.89E-06  | Wars      | 0.948543 | 28.30882 | 6.33E-06  | Pgk1       | 1.289574 | 81.33881 | 3.25E-17  | Ly86         | 0.536068 | 15.02162 | 0.0109171  |
| Hsp90ab1 | -0.50175 | 34.26279 | 1.39E-06  | Ifi27    | 1.478251 | 85.64978 | 2.92E-18  | Arpc1b    | 1.094263 | 169.2002 | 9.28E-36  | Ldha      | 0.944097 | 55.9927  | 1.45E-11  | Cndp2      | 1.28842  | 47.92062 | 3.15E-10  | Calr         | 0.526256 | 19.08369 | 0.0019619  |
| Colccl2  | -0.50217 | 10.62116 | 0.0302974 | Hspa1a   | 1.462052 | 26.2651  | 7.80E-06  | Ccrp1     | 1.087927 | 35.15327 | 1.79E-07  | Ferla     | 0.943513 | 13.72131 | 0.0050601 | Prdx5      | 1.272327 | 55.07951 | 1.09E-11  | Uhrf1        | 0.525399 | 11.23158 | 0.0047442  |
| Atp5fmg  | -0.50421 | 14.9652  | 0.0052058 | Pfkfb    | 1.458522 | 45.1974  | 9.22E-10  | MGC105567 | 1.087789 | 28.99726 | 3.14E-05  | Fam241a   | 0.942887 | 18.11087 | 1.28E-17  | Fam241a    | 1.265334 | 37.81757 | 3.96E-08  | RT1-Ra       | 0.519734 | 24.82848 | 0.0001502  |
| Tmem10   | -0.50545 | 10.27094 | 0.0302809 | Atg3     | 1.455301 | 59.11676 | 1.16E-12  | Srgn      | 1.083997 | 28.99726 | 3.49E-06  | Fam241a   | 0.932233 | 27.19115 | 1.05E-05  | Itih4      | 1.261853 | 44.55303 | 1.50E-09  | Rtfr1        | 0.516952 | 25.1183  | 0.0001378  |
| Vcp      | -0.50642 | 10.34182 | 0.03352   | Cd38     | 1.453907 | 42.86436 | 2.84E-09  | Ifi3      | 1.080434 | 13.63613 | 0.0037706 | Psmb8     | 0.921168 | 79.21509 | 2.12E-16  | Acadm      | 1.26112  | 35.72848 | 1.07E-07  | Ctss         | 0.509593 | 26.83503 | 6.54E-05   |
| Rexo2    | -0.50751 | 9.628578 | 0.044105  | Ctsc     | 1.452597 | 162.2856 | 1.48E-34  | Rhoh      | 1.073864 | 28.07656 | 5.29E-06  | Tmau1ap   | 0.919382 | 27.04361 | 1.12E-05  | Ccd134     | 1.259755 | 37.59759 | 4.40E-08  | Akr1a1       | 0.502839 | 18.55851 | 0.0023668  |
| Psm7     | -0.50996 | 16.68193 | 0.0025156 | Il1b     | 1.450637 | 26.15577 | 8.22E-06  | Cd86      | 1.072265 | 24.09374 | 3.30E-05  | Chst13    | 0.918585 | 19.59653 | 0.0003445 | Irfd8      | 1.253231 | 27.45228 | 5.40E-08  | Bcl2a1       | 0.500957 | 14.53204 | 0.0137844  |
| Lamp2    | -0.51256 | 9.414496 | 0.0479857 | Slamf8   | 1.434399 | 42.63069 | 3.19E-09  | Cnp       | 1.069994 | 23.64464 | 4.03E-05  | Plaz16    | 0.916577 | 29.32209 | 4.02E-06  | Nr1h3      | 1.252967 | 27.03372 | 6.72E-06  | Psmb2        | 0.499824 | 11.10566 | 0.0488334  |
| Bat2     | -0.51304 | 9.833906 | 0.0406967 | Snx20    | 1.433018 | 45.59823 | 7.58E-10  | Eif4a1    | 1.069922 | 121.9312 | 1.12E-25  | Bcl2a1    | 0.908682 | 54.78628 | 2.60E-11  | Basp1      | 1.243542 | 48.95011 | 1.96E-10  | Dpp7         | 0.484873 | 11.10412 | 0.0488134  |
| RT1-A2   | -0.51865 | 13.58744 | 0.0094556 | Cyts     | 1.426149 | 82.63021 | 1.27E-17  | Altp3a2   | 1.068261 | 60.10246 | 1.09E-05  | Psmb10    | 0.906428 | 10.42364 | 2.05E-12  | Slc39a1    | 1.232857 | 39.43047 | 1.81E-08  | LOC100910973 | 0.483176 | 13.04046 | 0.0246957  |
| Cox7b    | -0.5187  | 11.51675 | 0.0216614 | Rab20    | 1.416957 | 30.21981 | 1.18E-06  | Gltp      | 1.063204 | 28.65729 | 4.03E-06  | Ctsc      | 0.904887 | 104.3775 | 1.10E-21  | Ran        | 1.229549 | 74.61145 | 8.44E-16  | Rhoa         | 0.477747 | 11.58612 | 0.0414431  |
| Fxyd2    | -0.51891 | 10.4022  | 0.0083691 | Arf15a   | 1.414099 | 18.14239 | 2.26E-08  | Arf15a    | 1.058249 | 26.74188 | 9.93E-06  | Pirn2     | 0.904116 | 44.25204 | 3.55E-09  | Tnfr1      | 1.225828 | 17.75422 | 2.98E-12  | Eftsa        | 0.477321 | 14.02023 | 0.016915   |
| Car2     | -0.5193  | 11.05403 | 0.0257715 | Tnfrsf14 | 1.409777 | 35.46302 | 1.26E-07  | Eif4af    | 1.052757 | 35.96284 | 3.19E-07  | Tubb6     | 0.903135 | 24.05848 | 4.54E-05  | Nlcar1     | 1.217136 | 31.90316 | 6.83E-05  | Atpsf1b      | 0.474354 | 15.4132  | 0.0092873  |
| Ndufa2   | -0.51983 | 10.07786 | 0.037141  | Cxcl7    | 1.398924 | 24.95415 | 3.05E-08  | Tomm40    | 1.052656 | 30.51247 | 1.67E-06  | Eif6      | 0.893945 | 39.71245 | 2.95E-08  | Caln1      | 1.21671  | 140.3965 | 9.40E-30  | Poma1        | 0.471747 | 24.46732 | 0.0001774  |
| Galk2    | -0.52002 | 9.458615 | 0.0473155 | Tp1      | 1.3941   | 57.23311 | 2.81E-12  | Nr1h3     | 1.05164  | 19.13984 | 0.0003325 | Nudt9     | 0.89723  | 26.03768 | 1.79E-05  | Cd27a      | 1.21163  | 26.81563 | 7.46E-06  | Sh3bg3       | 0.4668   | 19.14487 | 0.0019359  |
| Btg1     | -0.52095 | 11.5607  | 0.0212745 | Nlkb2    | 1.392233 | 37.4846  | 3.81E-08  | Picalm    | 1.046705 | 31.70294 | 9.21E-07  | MGC108823 | 0.896418 | 13.55599 | 1.37E-06  | Adra4      | 1.210683 | 17.52258 | 2.05E-16  | Prrc2c       | 0.466586 | 14.2075  | 0.0156702  |
| Ppia     | -0.52381 | 26.01527 | 4.81E-05  | Srgn     | 1.376297 | 40.71398 | 8.07E-09  | LOC24906  | 1.046154 | 9.192234 | 0.0258053 | Cd63      | 0.895885 | 35.57595 | 2.06E-07  | Eif5a      | 1.209947 | 119.466  | 2.29E-25  | Cf1          | 0.463863 | 25.71099 | 0.0001086  |
| Pax8     | -0.52459 | 10.63254 | 0.0302974 | Ctsc     | 1.361465 | 29.01286 | 2.10E-06  | Nkfb2     | 1.043404 | 101.8264 | 2.02E-21  | Nkfb2     | 0.891588 | 22.89935 | 7.70E-05  | Snx20      | 1.208515 | 38.9722  | 2.27E-25  | Ctsc         | 0.46327  | 24.01943 | 0.0002151  |
| Sept8    | -0.5263  | 10.44922 | 0.0323228 | Ifng     | 1.358143 | 10.11513 | 0.013927  | Lap3      | 1.023493 | 43.033   | 4.27E-09  | MGC105649 | 0.889735 | 19.39438 | 0.0003783 | Il1rn      | 1.205618 | 25.67359 | 1.25E-05  | Ostf1        | 0.460063 | 11.14186 | 0.0488134  |
| Sep7     | -0.52767 | 10.5028  | 0.0317435 | Ly6al    | 1.355747 | 24.79311 | 1.55E-05  | Fgl2      | 1.020975 | 32.02784 | 8.00E-07  | Ripk3     | 0.887311 | 23.65805 | 5.46E-05  | Psmb2      | 1.197258 | 69.7192  | 9.59E-15  | Cd74         | 0.458061 | 22.13906 | 0.0004783  |
| Mmp7     | -0.53027 | 9.636212 | 0.0410405 | Cd27a    | 1.354897 | 32.87598 | 3.43E-07  | Pirn2     | 0.88659  | 29.03903 | 4.58E-06  | Ripk1     | 0.88659  | 29.03903 | 4.58E-06  | Igh1       | 1.194375 | 31.24886 | 8.95E-07  | Calb1        | 0.457505 | 16.90468 | 0.0052776  |
| Ndufa7   | -0.53147 | 10.12751 | 0.0363947 | Ube2f6   | 1.354752 | 40.80089 | 7.75E-09  | Ube2f6    | 1.011536 | 30.46018 | 1.71E-06  | Nlcar1    | 0.885586 | 16.99762 | 0.011493  | MGC108823  | 1.192964 | 40.8106  | 9.38E-09  | Ckb          | 0.456205 | 16.99907 | 0.004887   |
| Gabarrp2 | -0.53299 | 9.577622 | 0.0484835 | Fam241a  | 1.352533 | 38.55565 | 2.30E-08  | Ripk3     | 1.008588 | 24.67457 | 2.63E-05  | Sell      | 0.883685 | 17.45115 | 0.0009489 | Slc1       | 1.192626 | 53.38107 | 2.48E-11  | Tmsb4x       | 0.451206 | 41.83829 | 7.13E-08   |
| Arpc1a   | -0.53332 | 9.41219  | 0.0479576 | Dnae1l3  | 1.348302 | 18.31641 | 0.0003179 | Apo13     | 0.997084 | 19.18257 | 0.0003275 | Hif1a1    | 0.875933 | 23.9488  | 4.75E-05  | Hdx58      | 1.187973 | 30.56712 | 1.25E-06  | Aif1         | 0.441309 | 23.44305 | 0.0002643  |
| Sumo1    | -0.53365 | 10.59855 | 0.0305767 | Caln1    | 1.348147 | 166.1024 | 2.42E-35  | Cadm1     | 0.994451 | 23.24965 | 4.84E-05  | Slc2a1    | 0.879327 | 22.92097 | 7.64E-05  | Psm7       | 1.178578 | 113.5798 | 3.99E-24  | Arhgid5a     | 0.440261 | 17.73091 | 0.0189595  |
| Btf3     | -0.53484 | 17.03838 | 0.0022201 | Lgals3bp | 1.342987 | 46.31951 | 5.44E-10  | Dapk3     | 0.869671 | 38.58272 | 4.88E-08  | Myf6      | 0.869671 | 38.58272 | 4.88E-08  | Il1b       | 1.173485 | 19.34451 | 0.0002733 | B2m          | 0.438383 | 35.51243 | 1.33E-06   |
| Hnrrpk   | -0.53492 | 10.64994 | 0.0301013 | Gpr13    | 1.341405 | 35.53625 | 9.76E-08  | Sbno2     | 0.990213 | 24.5484  | 3.08E-05  | Myf6b     | 0.862128 | 110.2612 | 6.76E-23  | Actp2c     | 1.167298 | 124.8284 | 1.72E-05  | Actr3        | 0.435419 | 12.67535 | 0.0280416  |
| Whamm    | -0.53591 | 10.20672 | 0.0351435 | Pgk1     | 1.340077 | 76.90148 | 2.03E-16  | Tnfrsf14  | 0.898398 | 42.04464 | 6.72E-09  | Atp6vd1   | 0.859728 | 28.85047 | 9.55E-18  | Psm7a      | 1.166469 | 24.98176 | 1.72E-05  | Psm7a        | 0.429014 | 12.93519 | 0.0254802  |
| Cox6a1   | -0.53693 | 14.44161 | 0.0067539 | Cndp2    | 1.339337 | 45.35689 | 8.53E-10  | Tnfrsf14  | 0.98716  | 22.63949 | 4.64E-05  | Psmc10    | 0.858673 | 30.31352 | 5.20E-06  | Ptprc1     | 1.164519 | 23.6647  | 3.23E-05  | Ccnel        | 0.426376 | 11.32281 | 0.0458727  |
| Rhoa     | -0.53787 | 11.20611 | 0.0245065 | Arp23a   | 1.335287 | 44.49455 | 9.16E-09  | Picalm    | 0.980731 | 44.49455 | 2.07E-09  | Ptprc1    | 1.164407 | 20.0254  | 3.54E-03  | Hsp90ab1   | 1.164407 | 20.0254  | 3.54E-03  | Myh12        | 0.426423 | 13.33257 | 0.0221271  |
| Emc1     | -0.53829 | 9.990775 | 0.0381806 | Kcnna4   | 1.330655 | 36.03897 | 7.61E-08  | Cnsp4     | 0.979954 | 38.48396 | 3.56E-08  | Cnsp4     | 0.853641 | 21.83808 | 0.0001252 | Eno1       | 1.154784 | 52.00227 | 4.74E-11  | Coro1a       | 0.413964 | 11.13466 | 0.0488134  |
| Gnb2     | -0.53856 | 11.50737 | 0.021687  | Mbd2     | 1.330055 | 46.38413 | 5.29E-10  | Nr2a1     | 0.978674 | 26.88266 | 9.30E-06  | Mpr28     | 0.852674 | 24.53724 | 3.66E-05  | Rpo2       | 1.15465  | 99.20324 | 4.42E-21  | Rpo2         | 0.411862 | 42.52914 | 5.34E-08   |
| Cybb     | -0.53921 | 11.44673 | 0.0220349 | Piln2    | 1.329361 | 38.27408 | 2.62E-08  | Pouz2f    | 0.977559 | 24.05128 | 3.36E-05  | Trex1     | 0.850016 | 24.30553 | 4.05E-05  | Commnd9    | 1.149885 | 47.50716 | 3.82E-10  | Lias         | 0.410097 | 12.12848 | 0.0        |



|          |          |          |            |         |          |          |          |            |          |          |           |            |          |          |           |           |          |          |           |         |          |          |           |
|----------|----------|----------|------------|---------|----------|----------|----------|------------|----------|----------|-----------|------------|----------|----------|-----------|-----------|----------|----------|-----------|---------|----------|----------|-----------|
| Der1     | -0.61788 | 9.58723  | 0.0447431  | Nub1    | 1.193987 | 33.14569 | 3.03E-07 | Bcl3       | 0.89155  | 27.07917 | 8.46E-06  | Babam1     | 0.762857 | 18.53106 | 0.0005691 | Dapk3     | 1.032577 | 39.6733  | 1.61E-08  | Ifi27   | -0.47448 | 11.90157 | 0.0389606 |
| Atp5f1b  | -0.61972 | 18.69747 | 0.001094   | Taf9    | 1.193442 | 37.8339  | 2.16E-12 | Ptprc      | 0.890559 | 50.7994  | 1.04E-10  | RGD1311188 | 0.758324 | 11.79086 | 0.0011938 | Prrtm1    | 1.03235  | 45.20359 | 1.10E-09  | Rps21   | -0.50782 | 41.09866 | 9.25E-08  |
| Prdx1    | -0.62127 | 18.19678 | 0.0013703  | Stat2   | 1.192583 | 33.9381  | 2.08E-07 | Phf11      | 0.889899 | 26.91807 | 9.16E-06  |            | 0.758217 | 11.15732 | 0.0156946 | Ptge3     | 1.031127 | 50.99266 | 7.54E-11  | Rpl37a  | -0.5269  | 59.3157  | 2.57E-11  |
| Mdh2     | -0.62388 | 12.75018 | 0.00132598 | Kars    | 1.191016 | 36.4283  | 6.34E-08 | Tmau1ap    | 0.881468 | 20.55852 | 0.0001737 | Pkpk       | 0.757265 | 18.1975  | 0.0006689 | Ak2       | 1.029598 | 32.81909 | 1.48E-05  | Rps29   | -0.5322  | 73.89011 | 4.75E-14  |
| Rps27i   | -0.62411 | 17.01079 | 0.0021283  | Dhvl    | 1.188839 | 49.3895  | 1.23E-10 | Ragg6f6    | 0.880524 | 10.51631 | 0.0002829 | Asg8t2     | 0.756699 | 18.20964 | 0.0006641 | Cnp       | 1.028273 | 22.04604 | 6.79E-05  | Rps27   | -0.54695 | 54.79254 | 1.93E-10  |
| Elob     | -0.62454 | 21.87674 | 0.0002859  | Hclt1   | 1.188104 | 51.14443 | 5.38E-11 | Calp1      | 0.880466 | 19.12102 | 0.000335  | Calm1      | 0.756651 | 69.16667 | 2.81E-14  | Dxd9      | 1.026002 | 25.8119  | 1.38E-05  | Covt1   | -0.58741 | 11.20807 | 0.0478018 |
| Ndufb4   | -0.62525 | 15.24392 | 0.0004564  | Rala    | 1.183125 | 31.54317 | 6.39E-07 | Cd82       | 0.878018 | 21.25692 | 0.0001265 | Parp9      | 0.75527  | 19.62744 | 0.00034   | Acs1      | 1.021089 | 22.11314 | 6.63E-05  | Mrp152  | -0.58916 | 16.28179 | 0.0064738 |
| Lamp1    | -0.62562 | 16.01311 | 0.00032804 | Fubp1   | 1.181431 | 33.00027 | 3.23E-07 | Tpm1b      | 0.877845 | 53.86607 | 2.45E-11  | Atpc1b     | 0.751921 | 10.02507 | 2.67E-21  | Pcm1      | 1.019213 | 30.73399 | 1.15E-06  | Sec61g  | -0.59974 | 41.48384 | 0.0431887 |
| Psm2a    | -0.62648 | 13.21614 | 0.011035   | Arid5   | 1.180914 | 33.23881 | 2.91E-07 | Eif2s3     | 0.876956 | 24.16479 | 3.20E-05  | Kdelr2     | 0.751741 | 19.3523  | 0.0003856 | Parp14    | 1.019211 | 28.08975 | 4.11E-06  | Rps28   | -0.62566 | 57.89803 | 4.54E-11  |
| NKkb2    | -0.62795 | 9.884523 | 0.0398507  | Ezf5a   | 1.179867 | 29.82455 | 1.43E-06 | Ifi35      | 0.870054 | 24.28292 | 3.07E-05  | Psm2f      | 0.750624 | 61.95996 | 8.81E-13  | Mphosph10 | 1.018557 | 23.7802  | 3.08E-05  | Pax8    | -0.6379  | 13.30323 | 0.022229  |
| Cd30l0f  | -0.62844 | 9.643356 | 0.044105   | Tubb6   | 1.178956 | 29.73583 | 1.49E-06 | Namp1      | 0.865812 | 20.93931 | 0.0001454 | Csrp1      | 0.749205 | 20.40957 | 0.000239  | Capp      | 1.015485 | 21.66915 | 8.13E-05  | Sfn4    | -0.65946 | 18.16007 | 0.0028492 |
| Pxdcl1   | -0.62864 | 10.32403 | 0.0336128  | Pkm     | 1.177162 | 34.08656 | 1.94E-07 | Myl12a     | 0.865763 | 53.06705 | 3.54E-11  | Cd83       | 0.748782 | 14.78577 | 0.003127  | Mpr28     | 1.015177 | 27.10703 | 6.49E-06  | Amy2a3  | -0.80495 | 11.83374 | 0.0391318 |
| Msa1     | -0.62877 | 11.14486 | 0.0251154  | Ptgm6   | 1.175903 | 45.09318 | 9.68E-10 | Ifi5       | 0.858682 | 21.88084 | 9.28E-05  | Mrl147     | 0.748731 | 13.55513 | 0.0053869 | Psmc3     | 1.013709 | 47.44447 | 3.91E-10  | H7      | -0.81915 | 12.6884  | 0.028031  |
| Ube2v2   | -0.62917 | 11.68749 | 0.0203707  | Rac1    | 1.175073 | 59.69887 | 8.79E-13 | Slcp4d4    | 0.858576 | 18.74449 | 0.0003962 | Lgm1       | 0.746581 | 19.92515 | 0.0003901 | Etr       | 1.012176 | 28.62044 | 3.18E-06  | Klk1b3  | -1.13036 | 16.74443 | 0.0052903 |
| Atp6v0c  | -0.62983 | 27.92026 | 2.18E-05   | Ctct5   | 1.174443 | 73.36319 | 1.15E-15 | Lyfi1      | 0.858485 | 17.01413 | 0.0008488 | Anxa4      | 0.746313 | 28.89553 | 4.85E-06  | Tub1a1    | 1.011878 | 36.2239  | 8.46E-08  | S100a6  | -1.13164 | 13.45475 | 0.0214155 |
| Selenof  | -0.63112 | 11.11746 | 0.0251663  | Phf11f  | 1.17367  | 22.53106 | 4.45E-05 | Piezot1    | 0.857528 | 20.14748 | 0.0002105 | Lmnb1      | 0.744125 | 15.70058 | 0.0002771 | Lmna      | 1.01115  | 25.00214 | 1.71E-05  | Ifi271b | -1.42408 | 35.70387 | 1.26E-06  |
| Slk      | -0.63534 | 9.420301 | 0.0479536  | Casp1   | 1.167765 | 32.64474 | 3.80E-07 | Cc54       | 0.856175 | 48.76497 | 2.73E-10  | Cd99       | 0.741741 | 29.02717 | 0.0450861 | Vcp       | 1.011078 | 55.81555 | 7.65E-12  | Ins2    | -1.58924 | 54.65335 | 1.93E-08  |
| Hadha    | -0.63553 | 10.24827 | 0.0345482  | Got2    | 1.167651 | 38.75174 | 2.12E-08 | Tifa       | 0.854968 | 21.08591 | 0.0001372 | Cyba       | 0.740806 | 81.10521 | 9.36E-17  | Slamf8    | 1.010804 | 24.63373 | 2.03E-05  | Ins1    | -1.61282 | 46.51461 | 9.51E-09  |
| Tax1bp1  | -0.63957 | 13.24214 | 0.0109608  | Itgal   | 1.16516  | 38.59127 | 2.27E-08 | Parp14     | 0.853744 | 20.06789 | 0.0002176 | Ran        | 0.737394 | 36.0556  | 1.63E-07  | Cyb561a3  | 1.008888 | 10.88666 | 0.0114414 | Sst     | -2.86922 | 28.15432 | 3.79E-05  |
| Syp      | -0.64087 | 10.92757 | 0.0270987  | Uqcrrf1 | 1.164311 | 61.60327 | 3.44E-13 | Hgd3s      | 0.850933 | 15.52899 | 0.0016768 | Prrs1      | 0.736811 | 10.93811 | 0.0172536 | Idl1      | 1.008355 | 20.38587 | 0.0001479 |         |          |          |           |
| Snx10    | -0.64156 | 9.867506 | 0.0401302  | Wqars   | 1.162808 | 27.03049 | 5.45E-06 | Slc11a1    | 0.848995 | 13.40859 | 0.0041544 | Dram1      | 0.736599 | 14.96666 | 0.0028729 | Hclt1     | 1.00459  | 44.13493 | 1.84E-09  |         |          |          |           |
| RT1-A1   | -0.64288 | 10.45006 | 0.0428205  | Basp    | 1.161661 | 36.58808 | 5.65E-08 | Nkhib      | 0.848502 | 18.15517 | 9.85E-13  | Snrp       | 0.734955 | 16.94858 | 0.0011723 | Nme2      | 1.004197 | 69.38027 | 1.12E-14  |         |          |          |           |
| Lchtr    | -0.64352 | 11.6054  | 0.0208719  | Psm2b   | 1.158684 | 47.80887 | 2.64E-10 | Tpm2       | 0.847876 | 13.39021 | 0.0041776 | Vim        | 0.734892 | 16.95091 | 0.0011773 | Psm5      | 0.990754 | 43.19377 | 9.15E-09  |         |          |          |           |
| CDK89574 | -0.64382 | 12.39945 | 0.0252303  | Eif4e2  | 1.158062 | 34.2797  | 1.79E-07 | Mrt0a      | 0.847654 | 21.30174 | 0.0001242 | Bcl11a     | 0.733543 | 11.48953 | 0.0135316 | Cfl1      | 0.998667 | 136.1007 | 7.36E-29  |         |          |          |           |
| Bcl2a1   | -0.64415 | 15.71552 | 0.0037348  | Tubb4b  | 1.158503 | 30.23978 | 1.17E-06 | Parp15     | 0.846223 | 32.71451 | 5.82E-07  | MGC105567  | 0.730798 | 13.2574  | 0.0061325 | Calhm6    | 0.998578 | 26.07046 | 1.06E-05  |         |          |          |           |
| mrp19    | -0.64441 | 9.884287 | 0.0398507  | Atp5f1b | 1.156431 | 92.93419 | 8.00E-20 | Amp32e     | 0.844779 | 18.68505 | 0.0004078 | Mag3       | 0.730489 | 25.41254 | 2.41E-05  | Kdm       | 0.997781 | 14.27032 | 0.002463  |         |          |          |           |
| Ptma     | -0.6457  | 37.36718 | 3.54E-07   | Rtp4    | 1.155973 | 24.20701 | 2.05E-05 | CD72       | 0.844259 | 17.24506 | 0.0007716 | Bax        | 0.730289 | 31.99202 | 1.12E-06  | Apol3     | 0.996717 | 18.28635 | 0.0003859 |         |          |          |           |
| Wash3    | -0.64652 | 10.49567 | 0.0317907  | Mcrip2  | 1.153463 | 30.11947 | 1.23E-06 | Tagap      | 0.844234 | 14.88303 | 0.0022093 | Atap13a2   | 0.729263 | 15.82804 | 0.0019604 | Pdlim7    | 0.994934 | 25.83049 | 1.18E-05  |         |          |          |           |
| Hsape1   | -0.64803 | 10.10211 | 0.0172688  | Tpm4    | 1.152429 | 46.04461 | 6.20E-10 | Ube2d3     | 0.84391  | 50.50712 | 1.19E-10  | Eif5a      | 0.724579 | 59.06397 | 3.28E-12  | Tbm1b6    | 0.992321 | 40.67966 | 9.98E-09  |         |          |          |           |
| Hsp90b1  | -0.64883 | 15.10184 | 0.0048808  | Lmnb1   | 1.149882 | 27.88981 | 3.61E-06 | Dnajc7     | 0.843142 | 15.37611 | 0.0017867 | Irf8       | 0.723689 | 10.63325 | 0.0196761 | Tubb4b    | 0.991238 | 23.1712  | 4.07E-05  |         |          |          |           |
| Hspd1    | -0.64961 | 12.87159 | 0.012594   | Myl12a  | 1.149113 | 79.7876  | 6.55E-17 | RT1-Da     | 0.84281  | 60.40713 | 9.85E-13  | Prfil3b    | 0.722522 | 21.89978 | 0.0001225 | Cnrd2     | 0.990754 | 23.26339 | 3.90E-05  |         |          |          |           |
| Pdia3    | -0.6504  | 13.83628 | 0.0085676  | Stat3   | 1.148851 | 34.25847 | 1.80E-07 | Aifc5      | 0.842062 | 13.72191 | 0.0036338 | Vim        | 0.72029  | 19.66564 | 0.0003353 | Snrp1     | 0.998817 | 27.00695 | 8.80E-06  |         |          |          |           |
| Irgm     | -0.65086 | 10.18043 | 0.0355228  | Ogfr    | 1.148625 | 31.07456 | 7.96E-07 | Mtmr14     | 0.841902 | 10.07409 | 0.0005866 | Gnb1       | 0.719249 | 21.28598 | 0.0001595 | Iftm3     | 0.987512 | 16.5001  | 0.000879  |         |          |          |           |
| Psm4a    | -0.65122 | 17.69146 | 0.001674   | Acs1    | 1.148369 | 25.14893 | 9.13E-05 | Ptatr      | 0.841489 | 19.40637 | 0.0002971 | Lyar       | 0.715074 | 15.91672 | 0.0018796 | Itgal     | 0.986567 | 32.80022 | 4.32E-07  |         |          |          |           |
| GlT8d1   | -0.65272 | 10.80005 | 0.0284663  | Mvp     | 1.146961 | 45.73795 | 1.31E-05 | Ifi30      | 0.840667 | 63.00019 | 2.21E-13  | Adprm      | 0.714913 | 15.68053 | 0.0020943 | Rnl5      | 0.983538 | 27.32245 | 5.82E-06  |         |          |          |           |
| Atp5f1f  | -0.65309 | 22.20377 | 0.0002545  | Mrt0a   | 1.144954 | 31.59483 | 6.24E-07 | Wars       | 0.840117 | 18.00943 | 0.0005446 | Mdh2       | 0.713486 | 32.54032 | 8.62E-07  | MGC105567 | 0.983152 | 18.27091 | 0.0003884 |         |          |          |           |
| Hk3      | -0.6534  | 12.28705 | 0.0158326  | Cnp     | 1.143715 | 22.14431 | 5.30E-05 | Entpd1     | 0.839576 | 17.5019  | 0.0006879 | Dtx3l      | 0.711149 | 16.61368 | 0.0013659 | Eif3c     | 0.982102 | 47.90076 | 3.16E-10  |         |          |          |           |
| Litaf    | -0.65383 | 9.403216 | 0.048186   | Jp1t1   | 1.143069 | 68.90024 | 9.79E-15 | Alkhh3     | 0.83945  | 19.59362 | 0.0002744 | Gbp5       | 0.708276 | 10.03567 | 0.0252259 | Ppp1r14b  | 0.981105 | 44.80222 | 1.33E-09  |         |          |          |           |
| Ubn1     | -0.65406 | 9.810612 | 0.0411283  | Ac02    | 1.141854 | 33.19745 | 2.96E-07 | Mpr28      | 0.839091 | 19.54695 | 0.0002805 | Sept6      | 0.707453 | 15.31285 | 0.0024795 | Calr      | 0.980291 | 74.8652  | 7.52E-16  |         |          |          |           |
| Bcl5     | -0.65451 | 16.74845 | 0.0024609  | Phyhd1  | 1.138966 | 25.5161  | 1.10E-05 | Thsm2t2    | 0.838467 | 25.14853 | 0.0008007 | Taf12      | 0.70645  | 25.35409 | 0.0001007 | Prp12     | 0.976903 | 25.88669 | 1.15E-05  |         |          |          |           |
| Atp5mc2  | -0.65549 | 28.20449 | 1.95E-05   | Stx4    | 1.137607 | 32.56095 | 3.95E-07 | Gcgt       | 0.837842 | 16.6636  | 0.0010117 | Arid5a     | 0.703508 | 12.9327  | 0.0070505 | Cd86      | 0.97684  | 20.06446 | 0.0001722 |         |          |          |           |
| Ywhaz    | -0.65686 | 13.51524 | 0.0097281  | Pheta2  | 1.134739 | 29.83935 | 1.42E-06 | Cl1qb      | 0.837385 | 34.00683 | 3.13E-07  | Lyf6       | 0.702305 | 23.69011 | 5.39E-05  | Arhgd1a   | 0.97488  | 79.98211 | 6.28E-17  |         |          |          |           |
| Smim26   | -0.65702 | 10.32483 | 0.0336128  | Nmi     | 1.134403 | 30.96502 | 8.37E-07 | Raly       | 0.837236 | 32.70897 | 5.82E-07  | Med28      | 0.70214  | 17.19364 | 0.0010617 | Eif6      | 0.974702 | 38.10491 | 3.45E-08  |         |          |          |           |
| Sept2    | -0.65878 | 11.50153 | 0.021687   | Fam49b  | 1.133741 | 57.77584 | 2.21E-12 | Napsa      | 0.837161 | 31.90616 | 8.44E-07  | Kars       | 0.700561 | 19.30986 | 0.0003907 | Psmb3     | 0.970927 | 66.36347 | 4.64E-14  |         |          |          |           |
| Dhx58    | -0.65887 | 11.11989 | 0.0251663  | Ansp32b | 1.13157  | 54.50111 | 1.06E-11 | RGD1311188 | 0.834867 | 12.48285 | 0.0062311 | Tubb2b     | 0.700119 | 8.97955  | 0.0388536 | Mdh2      | 0.970869 | 45.52858 | 9.67E-10  |         |          |          |           |
| Cenpw    | -0.66201 | 11.13169 | 0.0251154  | Vcp     | 1.131389 | 62.64179 | 2.07E-13 | Tapb       | 0.832549 | 32.90617 | 5.33E-07  | Soc3       | 0.698886 | 18.01205 | 0.0007257 | Rftn1     | 0.969289 | 25.03946 | 1.68E-05  |         |          |          |           |
| Ten1     | -0.      |          |            |         |          |          |          |            |          |          |           |            |          |          |           |           |          |          |           |         |          |          |           |

|           |          |          |           |          |          |          |           |           |          |          |           |           |          |          |            |          |          |          |           |
|-----------|----------|----------|-----------|----------|----------|----------|-----------|-----------|----------|----------|-----------|-----------|----------|----------|------------|----------|----------|----------|-----------|
| Acadl     | -0.71064 | 12.94471 | 0.0122768 | M6pr     | 1.047426 | 24.13734 | 2.11E-05  | Rab35     | 0.780142 | 15.02007 | 0.0020722 | Map3k2    | 0.640144 | 13.98687 | 0.0044607  | Atic     | 0.905987 | 18.37638 | 0.0003707 |
| Mcrip2    | -0.71088 | 14.52625 | 0.0064842 | Csrp1    | 1.045172 | 27.05007 | 5.41E-06  | Eif5a     | 0.778518 | 62.0586  | 4.50E-13  | Paq5      | 0.639619 | 12.06039 | 0.0105803  | Hspd1    | 0.905174 | 29.21256 | 2.37E-06  |
| Pclaf     | -0.71108 | 11.78443 | 0.0197543 | Birc3    | 1.044831 | 19.78125 | 0.0001621 | Slc15a4   | 0.778422 | 16.93884 | 0.0008941 | LOC498276 | 0.639252 | 13.24326 | 0.0061671  | Preld3b  | 0.904264 | 25.29695 | 1.49E-05  |
| Tmed3     | -0.71307 | 11.15784 | 0.0250184 | Acadm    | 1.042746 | 22.48149 | 4.53E-05  | Ckb       | 0.778168 | 41.5757  | 8.23E-09  | Commnd9   | 0.638035 | 20.79756 | 0.0001997  | Cott1    | 0.903803 | 51.98274 | 4.76E-11  |
| LOC360231 | -0.71307 | 10.8969  | 0.0274809 | Gnl1     | 1.038128 | 29.05453 | 2.05E-06  | Arhgd1b   | 0.775983 | 36.98399 | 7.31E-08  | mrgl2l4   | 0.637848 | 16.34617 | 0.0015352  | Mr2      | 0.901814 | 16.01622 | 0.0010005 |
| Pamb10    | -0.71398 | 18.34122 | 0.001286  | Psmc2    | 1.036468 | 35.11939 | 1.18E-07  | Tapbp1    | 0.774811 | 15.47199 | 0.0001791 | Tcp1      | 0.637185 | 21.20717 | 0.0001651  | Eif1ad   | 0.899823 | 25.999   | 1.09E-05  |
| Sgra      | -0.71414 | 12.04285 | 0.0175054 | Ctsc     | 1.035367 | 28.06714 | 3.32E-06  | Rbm3      | 0.773735 | 49.19601 | 2.21E-10  | LOC500956 | 0.636947 | 12.18475 | 0.0100561  | Fcgr3a   | 0.897564 | 16.94766 | 0.0007153 |
| Birc2     | -0.71665 | 11.73101 | 0.0201156 | Lmma     | 1.035222 | 25.64036 | 1.05E-05  | Slamf7    | 0.772812 | 8.647558 | 0.0324543 | St3gal4   | 0.635381 | 13.41015 | 0.0057245  | Tuba1b   | 0.896997 | 34.78217 | 1.69E-07  |
| Mbd2      | -0.71679 | 12.90308 | 0.0124257 | Hspe1    | 1.034861 | 38.41233 | 2.45E-08  | Psmb3     | 0.771935 | 45.02139 | 1.61E-09  | Psmb6     | 0.634135 | 27.45794 | 9.25E-06   | Stat3    | 0.89603  | 24.89162 | 1.80E-05  |
| Pxdn      | -0.71739 | 17.80462 | 0.0015904 | Vcan1    | 1.034688 | 19.05214 | 0.0002375 | Tdx2      | 0.770809 | 14.6968  | 0.0023723 | Acsc      | 0.633739 | 17.11941 | 0.0010941  | Nras     | 0.895364 | 20.91571 | 0.0001156 |
| Alkbh7    | -0.72067 | 12.33922 | 0.0154921 | Sbno2    | 1.033999 | 23.44383 | 2.90E-05  | Mtdh      | 0.770016 | 27.17007 | 8.19E-06  | C2        | 0.632539 | 17.30173 | 0.0010181  | Ncf1     | 0.895175 | 23.03091 | 4.32E-05  |
| Klf6      | -0.72084 | 13.15826 | 0.0112672 | Timp1    | 1.033865 | 12.27141 | 0.0051564 | Mir142    | 0.769145 | 15.41401 | 0.0017603 | Psmc2     | 0.632294 | 20.62368 | 0.0002165  | Uqcr1    | 0.89469  | 31.42222 | 8.23E-07  |
| Klfk1     | -0.72195 | 11.00546 | 0.0262511 | Sifn4    | 1.033317 | 24.36957 | 1.89E-05  | Stat3     | 0.768498 | 20.2041  | 0.0002049 | Srf3      | 0.631433 | 26.53658 | 1.41E-05   | Nek6     | 0.893129 | 19.59908 | 0.0002113 |
| Naa50     | -0.72366 | 12.68008 | 0.0136304 | Hspd1    | 1.033036 | 24.08092 | 1.94E-07  | Tox4      | 0.768402 | 16.09581 | 0.0012951 | Cope      | 0.630809 | 14.94339 | 0.0028954  | Ncl      | 0.890939 | 38.32005 | 3.13E-08  |
| Tmem248   | -0.72399 | 12.0308  | 0.0175661 | Rexo2    | 1.032526 | 41.2482  | 6.31E-09  | Psmc12    | 0.768247 | 21.04483 | 0.0001398 | Gmfb      | 0.629981 | 12.14458 | 0.0102029  | Ube2d3   | 0.889246 | 50.84347 | 7.97E-11  |
| Cox6c     | -0.72416 | 36.91675 | 4.32E-07  | Ccl9     | 1.030996 | 7.577566 | 0.0424249 | Tmem37    | 0.767699 | 10.65494 | 0.0140887 | Atp5f1a   | 0.628704 | 30.7896  | 2.00E-06   | Crlf2    | 0.888828 | 24.91462 | 1.78E-05  |
| Hypk      | -0.72513 | 17.00086 | 0.0022283 | Ola1     | 1.027813 | 30.49631 | 1.04E-06  | Mapkapk3  | 0.767362 | 13.83831 | 0.0034406 | Piezo1    | 0.628435 | 12.75232 | 0.0076509  | Cd38     | 0.888413 | 19.54259 | 0.0002172 |
| Mocs2     | -0.72613 | 12.66729 | 0.013679  | Taldo1   | 1.026404 | 68.27172 | 1.31E-14  | Hivep3    | 0.767213 | 12.99694 | 0.0049651 | Ube2s     | 0.628229 | 17.7443  | 0.0008245  | Sdhb     | 0.887405 | 52.08679 | 4.58E-11  |
| Cox5a     | -0.7311  | 26.99931 | 3.13E-05  | Gars     | 1.025081 | 22.85158 | 3.83E-05  | Prrt1     | 0.766996 | 27.85237 | 5.85E-06  | Clec4e    | 0.62779  | 13.35251 | 0.0058656  | Trnau1ap | 0.886346 | 20.07449 | 0.0001716 |
| Fam3c     | -0.73116 | 13.51338 | 0.0097281 | Blmh     | 1.024442 | 24.93336 | 1.45E-05  | Emc8      | 0.764539 | 16.69249 | 0.0009984 | Api1s1    | 0.627195 | 15.62025 | 0.002157   | Vdac2    | 0.88367  | 69.08419 | 1.26E-14  |
| Fam162a   | -0.73159 | 11.71117 | 0.0201843 | Pla2g2d  | 1.024319 | 13.24424 | 0.0033448 | Cyba      | 0.763887 | 14.11583 | 0.0030491 | Smim5     | 0.626614 | 9.345464 | 0.00335108 | Pkig     | 0.882518 | 19.43189 | 0.0000285 |
| Rnf130    | -0.73689 | 12.34992 | 0.0154921 | Mcm6     | 1.022396 | 19.26269 | 0.0002066 | Ddx39a    | 0.76284  | 17.71857 | 0.0006199 | Aida      | 0.626213 | 12.04737 | 0.0106185  | Pop4     | 0.880835 | 17.44493 | 0.000565  |
| Scf1      | -0.73785 | 22.20832 | 0.0002545 | Sdhb     | 1.022188 | 58.20092 | 1.81E-12  | Rac1      | 0.7628   | 34.69463 | 2.24E-07  | lyp2      | 0.623201 | 18.75972 | 0.0005121  | Bw2      | 0.879987 | 20.00652 | 0.0001768 |
| Plek      | -0.73809 | 13.91195 | 0.0083578 | Ar1Sc    | 1.018688 | 18.02234 | 0.0003645 | Ugcg      | 0.762519 | 14.01931 | 0.0031888 | Tmem243   | 0.622731 | 12.13367 | 0.010232   | Bw1      | 0.879791 | 48.2554  | 2.69E-10  |
| Taf9      | -0.73838 | 17.79995 | 0.0015904 | Tmbim6   | 1.018535 | 38.54738 | 2.30E-08  | Wdr1      | 0.762435 | 23.61009 | 4.09E-05  | Ranbp1    | 0.621577 | 19.01018 | 0.0004518  | Dtnbp1   | 0.877763 | 18.47098 | 0.0003553 |
| Tkt       | -0.74173 | 20.85597 | 0.000455  | Mpc1     | 1.018408 | 36.12573 | 7.31E-08  | Mpeg1     | 0.761934 | 32.58852 | 1.66E-07  | Thsm6     | 0.619134 | 16.1268  | 0.0017068  | Dhps     | 0.876017 | 20.77201 | 0.0001231 |
| Atp5f1a   | -0.74355 | 21.89503 | 0.0002859 | Apol3    | 1.018335 | 15.82322 | 0.0010181 | Rbm25     | 0.76144  | 18.1958  | 0.0005079 | Rftn1     | 0.618769 | 13.83112 | 0.0048117  | Map2k2   | 0.872613 | 34.54938 | 1.88E-07  |
| Gpi       | -0.74574 | 19.5992  | 0.0007649 | Grrn     | 1.01821  | 44.46026 | 1.32E-09  | Cd74      | 0.761059 | 64.42794 | 1.51E-13  | Stat3     | 0.618699 | 16.28278 | 0.0015796  | Jak2     | 0.870361 | 20.66546 | 0.0001291 |
| Atp6v1b2  | -0.74646 | 12.85101 | 0.0126905 | Cyc1     | 1.016865 | 36.52164 | 6.09E-08  | Fyn       | 0.760994 | 15.0266  | 0.0020713 | Zc3hav1   | 0.618347 | 11.24068 | 0.0151009  | Dtx3l    | 0.870118 | 19.49773 | 0.0002219 |
| Akap9     | -0.74707 | 12.58291 | 0.0140344 | Fscn1    | 1.016208 | 8.142177 | 0.0333232 | Cyba      | 0.760774 | 72.17218 | 3.36E-15  | Cyc1      | 0.617585 | 19.68994 | 0.0003331  | Ppil1    | 0.869391 | 22.6506  | 5.14E-05  |
| Hfg1      | -0.74923 | 11.78688 | 0.0197543 | Hif1a    | 1.013639 | 21.98588 | 5.73E-05  | LOC498276 | 0.760555 | 15.56703 | 0.0016521 | Zfand2a   | 0.617125 | 11.8253  | 0.011779   | Tpm4     | 0.869065 | 30.74977 | 1.14E-06  |
| Tubb4b    | -0.75149 | 10.72156 | 0.0292157 | Ccdc134  | 1.013262 | 22.26249 | 5.02E-05  | MGC95208  | 0.760367 | 17.66894 | 0.0006339 | LOC314140 | 0.615814 | 12.65791 | 0.0079888  | Psmc5    | 0.868823 | 34.70305 | 1.75E-07  |
| Hikeshi   | -0.7532  | 13.85182 | 0.0085299 | Psmc6    | 1.011973 | 26.9635  | 5.63E-06  | Yhdh2     | 0.760318 | 18.18454 | 0.0005079 | Eif2b3    | 0.614137 | 12.60397 | 0.0081931  | Byl1     | 0.868076 | 23.52273 | 3.45E-05  |
| Aldoa     | -0.75395 | 22.40844 | 0.0002353 | Timm8a1  | 1.011814 | 22.52914 | 4.45E-05  | Nudt9     | 0.759582 | 15.41808 | 0.0017596 | Hnrnpdl   | 0.614019 | 14.98392 | 0.002872   | Tp53     | 0.86699  | 19.70088 | 0.0002015 |
| Ctsl      | -0.75406 | 14.14063 | 0.0076785 | Ten1     | 1.007441 | 13.20695 | 3.24E-05  | Rps6ka1   | 0.757596 | 16.65548 | 0.0010128 | Eif4a3    | 0.613092 | 15.90111 | 0.0018906  | Picalm   | 0.866873 | 21.5879  | 8.38E-05  |
| Hsph1     | -0.75471 | 14.18745 | 0.0075417 | Sf3b2    | 1.006373 | 48.08559 | 2.32E-10  | Ubp2      | 0.757262 | 15.60506 | 0.0016279 | Bzw2      | 0.612624 | 12.33412 | 0.0093486  | Tpm3     | 0.865176 | 52.53934 | 3.69E-11  |
| Slamf8    | -0.75483 | 12.77865 | 0.013103  | Nfkbia   | 1.005753 | 25.70335 | 1.02E-05  | Ube2i     | 0.756642 | 21.80033 | 9.65E-05  | Klrf1     | 0.612376 | 11.11135 | 0.0159619  | Rars     | 0.865041 | 19.21046 | 0.0002527 |
| Nducf2    | -0.75644 | 16.59076 | 0.0026129 | Cap1     | 1.005069 | 41.59814 | 5.32E-09  | Rgs10     | 0.755674 | 36.96271 | 7.36E-08  | Dbn1      | 0.612078 | 21.60171 | 0.0001401  | Etf1     | 0.864969 | 22.96995 | 4.43E-05  |
| Crispld1  | -0.7566  | 10.04509 | 0.0375148 | Psmb3    | 1.004289 | 64.31309 | 9.14E-14  | Rab32     | 0.754274 | 16.18863 | 0.0012531 | Tbpl1     | 0.610777 | 10.87717 | 0.0177208  | Glr3     | 0.863844 | 27.80954 | 4.61E-06  |
| Atp5md    | -0.7575  | 19.13103 | 0.000915  | Sp110    | 1.003717 | 30.58326 | 1.00E-06  | Fabp5     | 0.753513 | 10.90964 | 0.0126082 | Hck       | 0.610384 | 18.73556 | 0.0005171  | Psmc7    | 0.862879 | 26.69253 | 7.91E-06  |
| Sat1      | -0.75939 | 17.87796 | 0.0015443 | Ptma     | 1.001963 | 111.5031 | 8.98E-24  | Arpc2     | 0.752927 | 63.4069  | 2.41E-13  | Rnf126    | 0.609519 | 11.98837 | 0.0109222  | Hck      | 0.861623 | 27.81637 | 4.61E-06  |
| Echd1     | -0.75954 | 13.42903 | 0.0099924 | Serpine2 | 1.001509 | 8.439938 | 0.0293248 | Thrap3    | 0.75253  | 15.65149 | 0.001594  | Srd1      | 0.609176 | 14.38423 | 0.0037541  | Nubp1    | 0.861565 | 23.03696 | 4.32E-05  |
| Cdc48     | -0.76137 | 15.67446 | 0.0037826 | P4hb     | 1.001269 | 36.23292 | 6.96E-08  | Kars      | 0.75222  | 19.16853 | 0.0003291 | Ifi35     | 0.609043 | 14.9844  | 0.002872   | Cd9      | 0.861245 | 9.309835 | 0.0226016 |
| Sgk1      | -0.7623  | 11.13098 | 0.0251154 | Impdh2   | 1.000944 | 30.56449 | 1.01E-06  | Trim25    | 0.751961 | 13.39537 | 0.0004776 | Psm2      | 0.608626 | 11.54204 | 0.0132197  | Eif2s3   | 0.860288 | 23.17461 | 4.07E-05  |
| Ddx58     | -0.76498 | 13.93119 | 0.0083578 | Arpc5    | 1.000654 | 53.03219 | 2.14E-11  | Cnbp      | 0.751939 | 37.09904 | 6.98E-08  | Taf9      | 0.608277 | 26.49847 | 1.43E-05   | Arpc4    | 0.859238 | 56.40312 | 5.72E-12  |
| Vat1      | -0.76625 | 13.14228 | 0.0113181 | Aldoa    | 1.000099 | 51.07041 | 5.56E-11  | Eif3c     | 0.751708 | 32.13327 | 7.65E-07  | Selenoh   | 0.608138 | 22.19099 | 0.0001084  | Ddx39a   | 0.858845 | 21.27238 | 9.76E-05  |
| RT1-S3    | -0.76648 | 14.35549 | 0.0069827 | Gnl2     | 0.999576 | 23.07558 | 3.45E-05  | Eif4a     | 0.751058 | 22.86423 | 5.80E-05  | Psmc1     | 0.60801  | 15.18888 | 0.0026295  | Csnk2b   | 0.858346 | 37.40337 | 4.84E-08  |

plC11 vs PBS11

| Term                                         | Count | %    | P-Value  | Benjamini |
|----------------------------------------------|-------|------|----------|-----------|
| innate immune response                       | 5     | 55.6 | 3.20E-06 | 2.40E-04  |
| chronic inflammatory response                | 3     | 33.3 | 1.40E-05 | 5.30E-04  |
| neutrophil chemotaxis                        | 3     | 33.3 | 3.00E-04 | 6.60E-03  |
| positive regulation of inflammatory response | 3     | 33.3 | 3.50E-04 | 6.60E-03  |
| apoptotic process                            | 4     | 44.4 | 4.70E-04 | 7.00E-03  |
| neutrophil aggregation                       | 2     | 22.2 | 9.10E-04 | 1.10E-02  |
| positive regulation of peptide secretion     | 2     | 22.2 | 2.30E-03 | 2.40E-02  |
| peptidyl-cysteine S-nitrosylation            | 2     | 22.2 | 2.70E-03 | 2.60E-02  |

KRV11 vs plC11 (logFC>2.0) <<<<<<<<<<<<

| Term                                           | Count | %    | P-Value  | Benjamini |
|------------------------------------------------|-------|------|----------|-----------|
| response to lipopolysaccharide                 | 10    | 24.4 | 3.80E-09 | 1.50E-06  |
| cellular response to lipopolysaccharide        | 8     | 19.5 | 4.10E-08 | 8.40E-06  |
| cellular response to interferon-beta           | 5     | 12.2 | 7.50E-07 | 1.00E-04  |
| cellular response to tumor necrosis factor     | 6     | 14.6 | 7.30E-06 | 7.30E-04  |
| immune response                                | 7     | 17.1 | 1.60E-05 | 1.30E-03  |
| defense response to virus                      | 5     | 12.2 | 1.30E-04 | 9.00E-03  |
| positive regulation of cAMP metabolic process  | 3     | 7.3  | 1.80E-04 | 1.10E-02  |
| cellular response to interferon-gamma          | 4     | 9.8  | 2.60E-04 | 1.30E-02  |
| positive regulation of cAMP-mediated signaling | 3     | 7.3  | 3.70E-04 | 1.60E-02  |
| positive regulation of leukocyte chemotaxis    | 3     | 7.3  | 4.20E-04 | 1.70E-02  |
| response to drug                               | 7     | 17.1 | 6.50E-04 | 2.40E-02  |
| cellular response to interleukin-1             | 4     | 9.8  | 1.10E-03 | 3.60E-02  |

KRV11 vs plC11 (logFC>1.0) <<<<<<<<<<<<

| Term                                                               | Count | %   | P-Value  | Benjamini |
|--------------------------------------------------------------------|-------|-----|----------|-----------|
| response to lipopolysaccharide                                     | 30    | 9.3 | 5.90E-15 | 1.10E-11  |
| cellular response to interferon-beta                               | 13    | 4   | 2.60E-13 | 2.50E-10  |
| cellular response to lipopolysaccharide                            | 20    | 6.2 | 6.40E-11 | 4.00E-08  |
| defense response                                                   | 12    | 3.7 | 3.50E-10 | 1.60E-07  |
| response to virus                                                  | 14    | 4.4 | 1.10E-09 | 4.20E-07  |
| immune response                                                    | 22    | 6.9 | 5.90E-09 | 1.80E-06  |
| response to drug                                                   | 30    | 9.3 | 2.80E-08 | 7.40E-06  |
| defense response to virus                                          | 15    | 4.7 | 3.60E-08 | 8.50E-06  |
| cellular response to interferon-gamma                              | 11    | 3.4 | 7.00E-08 | 1.50E-05  |
| inflammatory response                                              | 20    | 6.2 | 8.00E-07 | 1.50E-04  |
| response to organic cyclic compound                                | 19    | 5.9 | 9.60E-07 | 1.60E-04  |
| negative regulation of apoptotic process                           | 26    | 8.1 | 2.70E-06 | 4.00E-04  |
| cellular response to tumor necrosis factor                         | 13    | 4   | 2.80E-06 | 4.00E-04  |
| glycolytic process                                                 | 8     | 2.5 | 3.60E-06 | 4.80E-04  |
| apoptotic process                                                  | 21    | 6.5 | 4.60E-06 | 5.80E-04  |
| response to bacterium                                              | 8     | 2.5 | 5.10E-06 | 6.00E-04  |
| response to interferon-gamma                                       | 7     | 2.2 | 7.70E-06 | 8.40E-04  |
| defense response to bacterium                                      | 12    | 3.7 | 1.70E-05 | 1.70E-03  |
| antigen processing and presentation of peptide antigen via MHC cla | 7     | 2.2 | 2.90E-05 | 2.80E-03  |
| cellular response to interleukin-1                                 | 10    | 3.1 | 4.30E-05 | 3.90E-03  |
| response to cytokine                                               | 10    | 3.1 | 4.60E-05 | 3.90E-03  |
| membrane to membrane docking                                       | 4     | 1.2 | 4.70E-05 | 3.90E-03  |

|                                                          |    |     |          |          |
|----------------------------------------------------------|----|-----|----------|----------|
| chemokine-mediated signaling pathway                     | 8  | 2.5 | 4.80E-05 | 3.90E-03 |
| leukocyte cell-cell adhesion                             | 6  | 1.9 | 5.40E-05 | 4.20E-03 |
| defense response to protozoan                            | 6  | 1.9 | 6.60E-05 | 4.90E-03 |
| response to glucocorticoid                               | 11 | 3.4 | 9.00E-05 | 6.30E-03 |
| positive regulation of inflammatory response             | 8  | 2.5 | 9.20E-05 | 6.30E-03 |
| response to nutrient                                     | 11 | 3.4 | 1.20E-04 | 7.70E-03 |
| positive regulation of apoptotic process                 | 17 | 5.3 | 2.20E-04 | 1.40E-02 |
| cellular response to organic cyclic compound             | 10 | 3.1 | 2.30E-04 | 1.40E-02 |
| positive regulation of T cell mediated cytotoxicity      | 5  | 1.6 | 2.60E-04 | 1.50E-02 |
| aging                                                    | 16 | 5   | 3.30E-04 | 1.90E-02 |
| innate immune response                                   | 14 | 4.4 | 5.30E-04 | 3.00E-02 |
| response to hypoxia                                      | 14 | 4.4 | 7.30E-04 | 4.00E-02 |
| response to unfolded protein                             | 5  | 1.6 | 7.70E-04 | 4.10E-02 |
| positive regulation of nitric oxide biosynthetic process | 6  | 1.9 | 9.50E-04 | 4.90E-02 |

#### KRV11 vs PBS11 (logFC>2.0) <<<<<<<<<<

| Term                                 | Count | %    | P-Value  | Benjamini |
|--------------------------------------|-------|------|----------|-----------|
| immune response                      | 6     | 46.2 | 9.50E-08 | 1.50E-05  |
| response to lipopolysaccharide       | 4     | 30.8 | 3.20E-04 | 1.90E-02  |
| chemokine-mediated signaling pathway | 3     | 23.1 | 3.70E-04 | 1.90E-02  |

#### KRV11 vs PBS11 (logFC>1.0) <<<<<<<<<<

| Term                                                            | Count | %    | P-Value  | Benjamini |
|-----------------------------------------------------------------|-------|------|----------|-----------|
| cellular response to interferon-gamma                           | 10    | 7.9  | 1.50E-10 | 1.60E-07  |
| cellular response to lipopolysaccharide                         | 13    | 10.3 | 6.50E-10 | 3.30E-07  |
| immune response                                                 | 15    | 11.9 | 1.40E-09 | 4.80E-07  |
| response to lipopolysaccharide                                  | 14    | 11.1 | 2.50E-08 | 6.20E-06  |
| cellular response to interferon-beta                            | 7     | 5.6  | 7.80E-08 | 1.60E-05  |
| defense response to virus                                       | 9     | 7.1  | 1.50E-06 | 2.50E-04  |
| cellular response to tumor necrosis factor                      | 9     | 7.1  | 2.00E-06 | 2.90E-04  |
| inflammatory response                                           | 12    | 9.5  | 2.90E-06 | 3.60E-04  |
| positive regulation of T cell proliferation                     | 7     | 5.6  | 3.70E-06 | 4.20E-04  |
| positive regulation of nitric oxide biosynthetic process        | 6     | 4.8  | 9.30E-06 | 9.30E-04  |
| defense response to protozoan                                   | 5     | 4    | 2.00E-05 | 1.90E-03  |
| response to interferon-gamma                                    | 5     | 4    | 3.20E-05 | 2.70E-03  |
| positive regulation of tyrosine phosphorylation of STAT protein | 3     | 2.4  | 1.20E-04 | 9.10E-03  |
| defense response                                                | 5     | 4    | 2.40E-04 | 1.70E-02  |
| proteolysis involved in cellular protein catabolic process      | 5     | 4    | 3.00E-04 | 2.00E-02  |
| cellular response to interleukin-1                              | 6     | 4.8  | 3.90E-04 | 2.40E-02  |
| response to cytokine                                            | 6     | 4.8  | 4.10E-04 | 2.40E-02  |
| chemokine-mediated signaling pathway                            | 5     | 4    | 4.60E-04 | 2.60E-02  |
| response to drug                                                | 12    | 9.5  | 5.20E-04 | 2.70E-02  |
| chemotaxis                                                      | 5     | 4    | 7.20E-04 | 3.60E-02  |
| cellular response to morphine                                   | 3     | 2.4  | 8.20E-04 | 3.90E-02  |
| response to toxic substance                                     | 6     | 4.8  | 9.60E-04 | 4.20E-02  |
| lipopolysaccharide-mediated signaling pathway                   | 4     | 3.2  | 9.80E-04 | 4.20E-02  |

#### KRV11 vs KRV9

| Term                                       | Count | %    | P-Value  | Benjamini |
|--------------------------------------------|-------|------|----------|-----------|
| cellular response to tumor necrosis factor | 11    | 12.8 | 4.10E-10 | 3.40E-07  |

|                                                          |    |      |          |          |
|----------------------------------------------------------|----|------|----------|----------|
| response to lipopolysaccharide                           | 13 | 15.1 | 4.30E-09 | 1.60E-06 |
| defense response to virus                                | 10 | 11.6 | 5.90E-09 | 1.60E-06 |
| cellular response to interferon-gamma                    | 8  | 9.3  | 1.00E-08 | 2.10E-06 |
| cellular response to lipopolysaccharide                  | 10 | 11.6 | 6.00E-08 | 9.90E-06 |
| immune response                                          | 11 | 12.8 | 3.20E-07 | 4.40E-05 |
| response to virus                                        | 7  | 8.1  | 1.80E-06 | 2.20E-04 |
| cellular response to interleukin-1                       | 7  | 8.1  | 5.20E-06 | 5.40E-04 |
| neutrophil chemotaxis                                    | 6  | 7    | 6.20E-06 | 5.70E-04 |
| cellular response to interferon-beta                     | 5  | 5.8  | 1.80E-05 | 1.50E-03 |
| positive regulation of nitric oxide biosynthetic process | 5  | 5.8  | 4.90E-05 | 3.70E-03 |
| inflammatory response                                    | 9  | 10.5 | 5.70E-05 | 3.90E-03 |
| apoptotic process                                        | 9  | 10.5 | 2.40E-04 | 1.50E-02 |
| response to glucocorticoid                               | 6  | 7    | 3.30E-04 | 2.00E-02 |
| negative regulation of apoptotic process                 | 10 | 11.6 | 5.20E-04 | 2.80E-02 |
| response to drug                                         | 10 | 11.6 | 6.00E-04 | 3.10E-02 |
| glycolytic process                                       | 4  | 4.7  | 7.20E-04 | 3.50E-02 |
| positive regulation of apoptotic process                 | 8  | 9.3  | 8.20E-04 | 3.70E-02 |
| positive regulation of isotype switching to IgG isotypes | 3  | 3.5  | 8.80E-04 | 3.80E-02 |

#### KRV11 vs KRV7

| Term                                                             | Count | %    | P-Value  | Benjamini |
|------------------------------------------------------------------|-------|------|----------|-----------|
| cellular response to interferon-beta                             | 11    | 5.3  | 2.80E-12 | 3.00E-09  |
| response to lipopolysaccharide                                   | 22    | 10.6 | 4.30E-12 | 3.00E-09  |
| cellular response to interferon-gamma                            | 11    | 5.3  | 1.10E-09 | 5.10E-07  |
| defense response                                                 | 10    | 4.8  | 2.20E-09 | 7.60E-07  |
| response to drug                                                 | 24    | 11.6 | 1.80E-08 | 5.10E-06  |
| cellular response to lipopolysaccharide                          | 14    | 6.8  | 3.90E-08 | 8.40E-06  |
| immune response                                                  | 17    | 8.2  | 4.20E-08 | 8.40E-06  |
| defense response to virus                                        | 12    | 5.8  | 1.60E-07 | 2.90E-05  |
| glycolytic process                                               | 8     | 3.9  | 1.90E-07 | 3.00E-05  |
| cellular response to tumor necrosis factor                       | 12    | 5.8  | 2.40E-07 | 3.40E-05  |
| response to virus                                                | 10    | 4.8  | 2.80E-07 | 3.50E-05  |
| response to organic cyclic compound                              | 15    | 7.2  | 1.90E-06 | 2.20E-04  |
| apoptotic process                                                | 17    | 8.2  | 2.90E-06 | 3.10E-04  |
| positive regulation of apoptotic process                         | 15    | 7.2  | 2.20E-05 | 2.20E-03  |
| neutrophil chemotaxis                                            | 7     | 3.4  | 4.00E-05 | 3.80E-03  |
| negative regulation of apoptotic process                         | 18    | 8.7  | 5.60E-05 | 4.90E-03  |
| cellular response to interleukin-1                               | 8     | 3.9  | 1.00E-04 | 8.30E-03  |
| proteolysis involved in cellular protein catabolic process       | 6     | 2.9  | 2.30E-04 | 1.80E-02  |
| positive regulation of reactive oxygen species metabolic process | 5     | 2.4  | 3.90E-04 | 2.80E-02  |
| chemokine-mediated signaling pathway                             | 6     | 2.9  | 3.90E-04 | 2.80E-02  |
| inflammatory response                                            | 12    | 5.8  | 4.50E-04 | 3.00E-02  |
| response to glucocorticoid                                       | 8     | 3.9  | 6.60E-04 | 4.20E-02  |

#### KRV9 vs KRV7

| Term                           | Count | %    | P-Value  | Benjamini |
|--------------------------------|-------|------|----------|-----------|
| immune response                | 4     | 28.6 | 5.30E-04 | 4.20E-02  |
| response to lipopolysaccharide | 4     | 28.6 | 6.00E-04 | 4.20E-02  |

hot macrophages vs others (excluding endocrine doublets)

|             | logFC    | PValue    | pAdj      |
|-------------|----------|-----------|-----------|
| Cxcl11      | 6.330078 | 3.93E-217 | 2.23E-213 |
| Ube2        | 5.169174 | 4.71E-61  | 1.84E-58  |
| Aasl1       | 4.554457 | 1.62E-112 | 2.29E-109 |
| Sod2        | 4.184409 | 1.01E-219 | 1.14E-215 |
| Cxcl9       | 3.943512 | 2.21E-75  | 1.25E-72  |
| Fabp5       | 3.894183 | 3.52E-125 | 6.65E-122 |
| Ly6c        | 3.60367  | 1.60E-45  | 4.02E-43  |
| Cxcl10      | 3.484664 | 5.63E-28  | 6.57E-26  |
| Gbp2        | 3.390812 | 1.29E-151 | 4.86E-148 |
| Sipi        | 3.374555 | 7.32E-27  | 7.90E-25  |
| MGC105649   | 3.18895  | 1.65E-136 | 4.66E-133 |
| Acod1       | 3.061094 | 3.02E-73  | 1.55E-70  |
| Upp1        | 2.984382 | 1.28E-62  | 5.35E-60  |
| Bcl11       | 2.850896 | 1.37E-81  | 1.11E-78  |
| Cmn3        | 2.812842 | 1.37E-68  | 6.20E-66  |
| Plac8       | 2.771322 | 1.23E-44  | 2.91E-42  |
| LOC691141   | 2.730426 | 8.94E-91  | 9.20E-88  |
| Txn1        | 2.656273 | 2.08E-128 | 4.71E-125 |
| Mir147      | 2.616492 | 2.02E-68  | 8.78E-66  |
| Nampt       | 2.611311 | 9.16E-77  | 5.46E-74  |
| Scin        | 2.601158 | 2.92E-31  | 4.29E-29  |
| Igfb5       | 2.58289  | 6.53E-30  | 8.90E-28  |
| Gbp5        | 2.525464 | 1.23E-50  | 3.86E-48  |
| Plek        | 2.427725 | 1.23E-84  | 1.08E-81  |
| RGD1565410  | 2.40907  | 1.11E-36  | 2.06E-34  |
| Itih3       | 2.397209 | 4.97E-32  | 7.40E-30  |
| Cd40        | 2.380477 | 1.27E-49  | 3.79E-47  |
| Pla2g16     | 2.345761 | 2.79E-60  | 1.05E-57  |
| Pme2        | 2.334955 | 9.03E-113 | 1.46E-109 |
| Il18bp      | 2.320558 | 6.56E-56  | 2.39E-53  |
| Tgm2        | 2.320077 | 2.28E-40  | 4.77E-38  |
| Hk3         | 2.314096 | 9.59E-49  | 2.78E-46  |
| Tnfrsf14    | 2.234517 | 4.99E-50  | 1.53E-47  |
| Marcksl1    | 2.227515 | 3.93E-36  | 7.06E-34  |
| Serpinb9    | 2.160937 | 7.39E-38  | 1.49E-35  |
| Fcnb        | 2.156108 | 6.20E-08  | 1.21E-06  |
| Irf1        | 2.126712 | 5.07E-44  | 1.15E-41  |
| Tap1        | 2.113468 | 1.19E-50  | 3.83E-48  |
| Ly6a        | 2.078282 | 6.49E-27  | 7.06E-25  |
| Socs1       | 2.055404 | 2.13E-26  | 2.21E-24  |
| Itih2       | 2.037675 | 3.41E-18  | 1.99E-16  |
| LOC10091097 | 2.031352 | 7.51E-69  | 3.69E-66  |
| Cdkn1a      | 1.986299 | 1.88E-20  | 1.32E-18  |
| Fbxo27      | 1.982827 | 6.03E-31  | 8.65E-29  |
| Prdx5       | 1.980678 | 1.14E-46  | 3.15E-44  |
| Samhd1      | 1.979658 | 1.61E-21  | 1.20E-19  |
| Gapdh       | 1.935741 | 3.38E-91  | 3.83E-88  |

Dendritic cells vs others (excluding endocrine doublets)

|           | logFC    | PValue    | pAdj      |
|-----------|----------|-----------|-----------|
| Sipi      | 6.463253 | 2.47E-67  | 4.66E-64  |
| Cd5       | 3.996022 | 2.46E-09  | 3.29E-07  |
| Cxcl9     | 3.911326 | 2.63E-42  | 1.94E-39  |
| Xcr1      | 3.587878 | 2.38E-62  | 3.37E-59  |
| Cd11      | 3.302788 | 8.19E-10  | 4.78E-08  |
| Serpinb6b | 3.274696 | 4.93E-35  | 2.33E-32  |
| Slamf7    | 3.20902  | 9.87E-53  | 1.12E-49  |
| Cd3       | 3.183759 | 5.69E-136 | 6.44E-132 |
| Itihg     | 3.144984 | 4.19E-07  | 1.48E-05  |
| Dnase1l3  | 3.02679  | 2.49E-24  | 6.57E-22  |
| Ctse      | 3.01496  | 2.48E-42  | 1.94E-39  |
| MGC105649 | 2.990849 | 1.70E-57  | 2.14E-54  |
| Tnni2     | 2.912168 | 1.56E-41  | 1.04E-38  |
| Batf3     | 2.838481 | 5.26E-36  | 2.71E-33  |
| Clec9a    | 2.810159 | 1.19E-44  | 1.12E-41  |
| Csrp1     | 2.758229 | 2.63E-42  | 1.94E-39  |
| Irf8      | 2.752682 | 1.39E-36  | 7.52E-34  |
| Tmsb10    | 2.719053 | 1.51E-108 | 8.52E-105 |
| Ptms      | 2.686553 | 1.79E-62  | 2.90E-59  |
| Rala      | 2.615949 | 5.19E-38  | 2.94E-35  |
| Rab7b     | 2.604709 | 9.24E-30  | 3.73E-27  |
| Klrl1     | 2.531769 | 2.02E-22  | 4.98E-20  |
| Klrc3     | 2.525424 | 6.06E-19  | 1.12E-16  |
| Naa       | 2.522303 | 2.02E-23  | 5.19E-21  |
| Mir147    | 2.498454 | 2.14E-29  | 8.35E-27  |
| Sept6     | 2.473059 | 1.08E-30  | 4.68E-28  |
| Sl00a11   | 2.439317 | 2.16E-25  | 6.62E-23  |
| Aasl      | 2.345959 | 1.78E-17  | 2.72E-15  |
| H2afz     | 2.345117 | 3.61E-35  | 1.78E-32  |
| Fabp5     | 2.343967 | 1.17E-19  | 2.29E-17  |
| Flt3      | 2.294241 | 3.72E-25  | 1.03E-22  |
| Pkb       | 2.286044 | 2.54E-21  | 5.63E-19  |
| Pla2g16   | 2.271588 | 9.25E-27  | 3.08E-24  |
| Ilgae     | 2.232799 | 4.19E-18  | 6.88E-16  |
| Ppt1      | 2.232304 | 3.77E-34  | 1.71E-31  |
| Prr15     | 2.231213 | 3.32E-18  | 5.69E-16  |
| Qprt      | 2.229133 | 6.85E-19  | 1.25E-16  |
| Fdps      | 2.18464  | 5.62E-15  | 6.63E-13  |
| Lims1     | 2.119539 | 7.56E-18  | 1.19E-15  |
| Cdln1a    | 2.11137  | 6.20E-12  | 5.15E-10  |
| Fscn1     | 2.109145 | 3.15E-05  | 0.0007066 |
| Acadm     | 2.098239 | 5.58E-20  | 1.13E-17  |
| Id2       | 2.07452  | 1.01E-10  | 7.02E-09  |
| Samhd1    | 2.070964 | 2.47E-12  | 2.18E-10  |
| Lrrk2     | 2.051011 | 1.92E-18  | 3.39E-16  |
| Basg1     | 2.044068 | 2.77E-20  | 5.70E-18  |
| Ppt2      | 1.985928 | 6.01E-18  | 9.72E-16  |

B cells vs others (excluding endocrine doublets)

|           | logFC    | PValue    | pAdj      |
|-----------|----------|-----------|-----------|
| Cd79b     | 4.006305 | 6.03E-70  | 6.83E-66  |
| Cyb5b1a3  | 3.718281 | 5.68E-61  | 3.22E-57  |
| Kdr       | 3.079547 | 6.31E-24  | 2.97E-21  |
| Mda1a     | 3.051228 | 2.67E-39  | 3.36E-36  |
| Cnp       | 2.863131 | 5.14E-41  | 7.27E-38  |
| LOC24906  | 2.71789  | 1.44E-14  | 2.40E-12  |
| Hpsa      | 2.700096 | 4.07E-29  | 2.42E-26  |
| Bcl11a    | 2.631164 | 4.74E-30  | 2.98E-27  |
| Fcrla     | 2.609098 | 5.29E-15  | 9.35E-13  |
| Chst13    | 2.588793 | 7.47E-28  | 4.23E-25  |
| Ptprcap   | 2.552842 | 1.72E-22  | 7.48E-20  |
| Gapd      | 2.480568 | 2.68E-22  | 1.08E-19  |
| Rasgrp2   | 2.453411 | 4.67E-18  | 1.29E-15  |
| Rnase6    | 2.397722 | 9.48E-21  | 3.46E-18  |
| Rpia      | 2.30015  | 4.66E-20  | 1.55E-17  |
| Smm5      | 2.158403 | 1.20E-17  | 3.01E-15  |
| Cd3g      | 2.157245 | 0.0007892 | 0.0158137 |
| Plac8     | 2.152452 | 8.86E-14  | 1.39E-11  |
| Tcf4      | 2.130471 | 1.14E-16  | 2.58E-14  |
| Dnajc7    | 2.129708 | 1.97E-18  | 6.02E-16  |
| Ccr6      | 2.011922 | 3.63E-09  | 3.00E-07  |
| Spib      | 1.960952 | 2.25E-17  | 5.53E-15  |
| Pagr5     | 1.945358 | 7.34E-18  | 1.93E-15  |
| Ddit4     | 1.943754 | 3.43E-15  | 6.25E-13  |
| Sept1     | 1.934975 | 1.16E-12  | 1.65E-10  |
| Sic44a2   | 1.907278 | 1.76E-13  | 2.62E-11  |
| Sell      | 1.902594 | 9.61E-10  | 8.91E-08  |
| Cd19      | 1.895338 | 2.32E-16  | 5.05E-14  |
| Sema4d    | 1.893522 | 1.89E-12  | 2.61E-10  |
| Serpinb6b | 1.876123 | 1.25E-09  | 1.11E-07  |
| Kynu      | 1.84897  | 9.36E-16  | 1.93E-13  |
| Pygm      | 1.845414 | 9.03E-19  | 2.92E-16  |
| Cyfp2     | 1.83995  | 2.01E-12  | 2.74E-10  |
| Abhd17b   | 1.824354 | 1.28E-11  | 1.51E-09  |
| Idi1      | 1.816166 | 5.97E-10  | 5.83E-08  |
| Cr2       | 1.791167 | 1.01E-15  | 2.05E-13  |
| Irf8      | 1.75766  | 8.29E-12  | 1.01E-09  |
| Tubgcp5   | 1.742165 | 2.30E-12  | 3.10E-10  |
| C1qlb     | 1.727317 | 1.10E-16  | 2.54E-14  |
| Stap1     | 1.707653 | 3.38E-11  | 3.83E-09  |
| Flt3      | 1.686849 | 7.46E-12  | 9.18E-10  |
| Fcmr      | 1.667711 | 4.17E-07  | 2.22E-05  |
| Tspan13   | 1.628807 | 1.18E-10  | 1.24E-08  |
| Runx2     | 1.58553  | 9.55E-11  | 1.01E-08  |
| Scl       | 1.582768 | 6.71E-13  | 9.74E-11  |
| Pde6h     | 1.572119 | 5.92E-15  | 1.03E-12  |
| Rhoh      | 1.569022 | 9.44E-09  | 6.90E-07  |

"hot" macrophages vs others

| Term                                       | Count | %    | P-Value  | Benjamini |
|--------------------------------------------|-------|------|----------|-----------|
| response to bacterium                      | 10    | 24.4 | 2.20E-10 | 9.60E-08  |
| defense response to virus                  | 8     | 19.5 | 4.80E-08 | 1.00E-05  |
| cellular response to lipopolysaccharide    | 8     | 19.5 | 9.80E-07 | 1.40E-04  |
| response to lipopolysaccharide             | 7     | 17.1 | 1.30E-05 | 1.40E-03  |
| cellular response to tumor necrosis factor | 6     | 14.6 | 2.20E-05 | 1.90E-03  |
| cellular response to interferon-beta       | 4     | 9.8  | 6.10E-05 | 4.40E-03  |
| response to virus                          | 4     | 9.8  | 7.50E-04 | 4.60E-02  |

dendritic cells vs others

| Term                                    | Count | %    | P-Value  | Benjamini |
|-----------------------------------------|-------|------|----------|-----------|
| cellular response to interferon-gamma   | 5     | 11.6 | 9.20E-05 | 4.90E-02  |
| response to glucocorticoid              | 5     | 11.6 | 1.60E-04 | 4.90E-02  |
| chemokine-mediated signaling pathway    | 4     | 9.3  | 2.50E-04 | 4.90E-02  |
| cellular response to lipopolysaccharide | 6     | 14   | 3.20E-04 | 4.90E-02  |
| dendritic cell differentiation          | 3     | 7    | 3.90E-04 | 4.90E-02  |

B cells vs others

<no significant GO BP pathways. B cells.>

| KRV11 vs KRV9 | logFC    | LR       | pAdj     |
|---------------|----------|----------|----------|
| Ifng          | 3.21975  | 30.27882 | 1.82E-05 |
| Gzmb          | 2.493782 | 34.29079 | 2.94E-06 |
| Isg15         | 2.059351 | 35.60601 | 1.77E-06 |
| Cd3e          | 1.605434 | 67.59039 | 4.35E-13 |
| Manf          | 1.591035 | 33.77215 | 3.53E-06 |
| Gadd45b       | 1.476696 | 21.86731 | 0.00073  |
| RGD1564664    | 1.359607 | 13.7325  | 0.020364 |
| Icos          | 1.329818 | 16.05192 | 0.008529 |
| Zbed5         | 1.292725 | 44.03518 | 3.00E-08 |
| Eif4e2        | 1.260495 | 26.09623 | 0.000123 |
| Lgals3        | 1.254286 | 21.25352 | 0.000981 |
| RT1-CE5       | 1.253842 | 67.48377 | 4.35E-13 |
| Zbtb32        | 1.194934 | 16.42911 | 0.007546 |
| Irf7          | 1.194486 | 14.06947 | 0.018427 |
| Mx1           | 1.176424 | 14.06784 | 0.018427 |
| Srm           | 1.154327 | 16.41646 | 0.007546 |
| Cdkn3         | 1.116007 | 13.3454  | 0.023487 |
| Dkc1          | 1.095918 | 17.99027 | 0.004211 |
| Nfkb2         | 1.07951  | 16.23331 | 0.008078 |
| Ifitm1        | 1.060191 | 18.04674 | 0.004165 |
| Sec23b        | 1.039728 | 16.35413 | 0.007687 |
| Tomm34        | 1.025287 | 17.322   | 0.005385 |
| Pkm           | 1.023783 | 12.40386 | 0.032263 |
| Rars          | 1.020746 | 14.69872 | 0.014562 |
| Amd1          | 1.004559 | 14.87882 | 0.014258 |
| Avpi1         | 0.998317 | 13.6481  | 0.020773 |
| Sirt2         | 0.997397 | 14.33645 | 0.016655 |
| Tomm40        | 0.995946 | 12.83967 | 0.028194 |
| Ldhd          | 0.988363 | 12.71145 | 0.028877 |
| Icam1         | 0.978898 | 11.57157 | 0.043683 |
| Snrpa         | 0.973278 | 14.33969 | 0.016655 |
| Rrp9          | 0.970119 | 12.47603 | 0.031286 |

| KRV11 vs KRV7 | logFC    | LR       | pAdj     |
|---------------|----------|----------|----------|
| Gcg           | 4.155033 | 28.66635 | 2.09E-05 |
| Ifng          | 4.120838 | 17.61103 | 0.003287 |
| Gzmb          | 3.216075 | 19.96389 | 0.001226 |
| Ube2c         | 3.072786 | 16.55432 | 0.004949 |
| LOC100911498  | 2.642377 | 40.81979 | 9.77E-08 |
| Ccl4          | 2.536123 | 15.29424 | 0.008642 |
| Fabp5         | 2.375606 | 16.60495 | 0.004922 |
| Lgals1        | 2.325319 | 21.79776 | 0.000529 |
| Lime1         | 2.117628 | 31.25239 | 6.59E-07 |
| Cd3e          | 2.036207 | 36.08429 | 7.83E-07 |
| Ccl5          | 1.963356 | 10.71988 | 0.047913 |
| Surf4         | 1.91064  | 16.97317 | 0.004284 |
| Ctsw          | 1.896621 | 37.36904 | 4.42E-07 |
| Prdx5         | 1.894085 | 13.44951 | 0.019191 |
| Tuba1a        | 1.886561 | 15.37396 | 0.008434 |
| Atf4          | 1.880613 | 23.94299 | 0.000201 |
| Gzmk          | 1.849123 | 12.27602 | 0.027412 |
| Kpna2         | 1.841258 | 11.17525 | 0.042987 |
| Smad4         | 1.831703 | 16.55565 | 0.004949 |
| Fkbp8         | 1.819717 | 18.06943 | 0.002787 |
| Actb          | 1.817945 | 96.33907 | 1.20E-19 |
| Tubb4b        | 1.817558 | 11.31793 | 0.04095  |
| Gng10         | 1.795157 | 15.29183 | 0.008642 |
| Mki67         | 1.794156 | 10.88235 | 0.04579  |
| Lysmd2        | 1.790935 | 16.67494 | 0.004796 |
| Prmt1         | 1.78884  | 18.26569 | 0.002582 |
| RT1-A1        | 1.774578 | 29.65208 | 1.32E-05 |
| Txn2          | 1.756723 | 18.72753 | 0.002134 |
| Eif3c         | 1.752525 | 20.6124  | 0.000917 |
| Cotl1         | 1.713444 | 32.61082 | 3.92E-06 |
| Ccdc124       | 1.69861  | 16.42155 | 0.005199 |
| Sept11        | 1.693443 | 12.34087 | 0.027135 |

| KRV9 vs KRV7 | logFC    | LR       | pAdj     |
|--------------|----------|----------|----------|
| Gcg          | 4.169671 | 53.79014 | 1.99E-09 |
| Ube2c        | 2.739698 | 20.22392 | 0.004105 |
| Lgals1       | 2.554313 | 20.57431 | 0.003662 |
| LOC100911498 | 2.241283 | 17.84296 | 0.011286 |
| Mki67        | 2.236326 | 14.92121 | 0.033397 |
| Gzmk         | 2.010869 | 15.94082 | 0.023365 |
| Zfp3612      | 1.90477  | 16.36137 | 0.020233 |
| Chtop        | 1.595398 | 14.51737 | 0.04004  |
| Myl6l        | 1.385517 | 20.5876  | 0.003662 |
| Sub1         | 1.375039 | 18.70567 | 0.008019 |
| Lck          | 1.234116 | 15.11087 | 0.032462 |
| Ctsw         | 1.195036 | 15.44796 | 0.029155 |
| Ins1         | 1.150505 | 17.88426 | 0.011286 |
| Ins2         | 1.090399 | 14.38325 | 0.041652 |
| Actb         | 1.024632 | 25.0805  | 0.000491 |
| RT1-CE10     | 0.996699 | 17.63413 | 0.011965 |
| Cfl1         | 0.940601 | 15.10503 | 0.032462 |
| Pfn1         | 0.902441 | 17.00617 | 0.015137 |
| Myl6         | 0.825434 | 17.05583 | 0.015137 |
| Rps15a       | -0.51222 | 14.97732 | 0.033397 |
| Rps26        | -0.56179 | 16.29074 | 0.020233 |
| Rpl35        | -0.61918 | 23.83829 | 0.000851 |
| Rpl35al1     | -0.66743 | 25.78231 | 0.000407 |
| Rpl41        | -0.74531 | 33.74241 | 1.12E-05 |
| Rps27        | -0.77385 | 25.64619 | 0.000407 |
| Rps29        | -0.81009 | 33.88326 | 1.12E-05 |
| Rpl36a       | -0.83384 | 18.76756 | 0.008019 |
| Rpl37a       | -0.83456 | 30.66304 | 3.92E-05 |
| Rpl36        | -0.86579 | 37.52132 | 3.15E-06 |
| Rps28        | -1.15581 | 37.21717 | 3.15E-06 |
| Plac8        | -1.53898 | 21.99787 | 0.002033 |
| Mzb1         | -2.90602 | 32.59956 | 1.69E-05 |

# KRV11 vs KRV9

| Term                                        | Count | %  | P-Value  | Benjamini |
|---------------------------------------------|-------|----|----------|-----------|
| defense response to virus                   | 4     | 16 | 6.00E-04 | 1.30E-01  |
| response to virus                           | 3     | 12 | 5.10E-03 | 3.90E-01  |
| spermidine biosynthetic process             | 2     | 8  | 5.20E-03 | 3.90E-01  |
| T cell costimulation                        | 2     | 8  | 2.80E-02 | 1.00E+00  |
| innate immune response                      | 3     | 12 | 4.50E-02 | 1.00E+00  |
| T cell receptor signaling pathway           | 2     | 8  | 5.90E-02 | 1.00E+00  |
| neutrophil chemotaxis                       | 2     | 8  | 7.30E-02 | 1.00E+00  |
| positive regulation of T cell proliferation | 2     | 8  | 8.30E-02 | 1.00E+00  |
| cell cycle arrest                           | 2     | 8  | 9.40E-02 | 1.00E+00  |



| piC11 vs PBS11 | logFC    | LR       | pAdj     | KRV11 vs piC11 | logFC    | LR       | pAdj     | KRV11 vs PBS11 | logFC    | LR        | pAdj     | KRV11 vs KRV9 | logFC    | LR       | pAdj     | KRV11 vs KRV7 | logFC    | LR       | pAdj     | KRV9 vs KRV7 | logFC    | LR       | pAdj     |
|----------------|----------|----------|----------|----------------|----------|----------|----------|----------------|----------|-----------|----------|---------------|----------|----------|----------|---------------|----------|----------|----------|--------------|----------|----------|----------|
| Pl16           | 3.469577 | 43.42499 | 3.59E-08 | Cxd10          | 4.894096 | 66.53582 | 2.62E-13 | Cxc10          | 4.188067 | 372.1208  | 7.65E-79 | Ubd1          | 4.357099 | 86.95932 | 1.69E-17 | Ubd1          | 5.44129  | 113.3517 | 1.50E-23 | Cxc10        | 2.050254 | 10.46657 | 0.001874 |
| H19            | 1.710437 | 15.08318 | 0.009396 | Xcd10          | 4.661918 | 45.3358  | 6.13E-09 | Loc10          | 3.916454 | 57.33908  | 1.08E-11 | Ucd1          | 3.368184 | 68.96481 | 9.44E-14 | Ucd10         | 4.910586 | 98.40061 | 2.48E-20 | LOC100911498 | 1.937736 | 88.13994 | 3.70E-17 |
| Pla2g2a        | 1.616885 | 10.94733 | 0.041643 | LOC100911498   | 4.150446 | 289.8952 | 6.00E-61 | Ucd11          | 3.543003 | 41.30916  | 2.52E-08 | Cc17          | 3.07583  | 47.61397 | 1.59E-09 | Cxc11         | 3.615559 | 62.56741 | 7.12E-13 | Gcg          | 1.18889  | 51.67086 | 1.32E-09 |
| Mtap5          | 1.320206 | 16.14602 | 0.006142 | Cxc9           | 3.528537 | 45.7615  | 5.09E-09 | Ucd11          | 2.924493 | 20.24787  | 0.000423 | Cxc10         | 2.848077 | 36.10911 | 3.57E-07 | Cxc11         | 3.104068 | 55.05177 | 2.39E-11 | Pyy          | 1.711288 | 57.5752  | 0.007192 |
| Gsn            | 1.265825 | 29.43369 | 2.11E-05 | Cxc11          | 3.391594 | 28.33433 | 1.48E-05 | Cc17           | 2.923971 | 22.78469  | 0.000133 | Cc19          | 2.561374 | 10.13993 | 1.03E-20 | Cc17          | 3.00564  | 31.98156 | 1.64E-06 | Cd9          | 1.490142 | 37.54477 | 7.22E-07 |
| Tnfrsps1       | 1.166091 | 21.08061 | 0.000848 | Cc7            | 2.717871 | 17.10841 | 0.002269 | Cc19           | 2.818164 | 35.90573  | 3.18E-07 | Cc19          | 2.310154 | 36.38418 | 3.36E-07 | Cc19          | 2.734955 | 68.87026 | 3.63E-14 | Kr119        | 1.429147 | 14.16579 | 0.011532 |
| Wfrc1          | 1.073427 | 14.85258 | 0.010186 | MGC108823      | 2.494277 | 62.51918 | 1.82E-12 | Cc19           | 2.632458 | 42.81653  | 1.19E-08 | Iglt5         | 2.211084 | 83.3691  | 8.33E-17 | Gbp2          | 2.709496 | 82.07444 | 6.35E-17 | Ube2c        | 1.370635 | 14.06607 | 0.01189  |
| Gpc3           | 1.028403 | 13.4483  | 0.016866 | Cc2            | 2.473636 | 18.79241 | 0.001134 | Cc12           | 2.581493 | 26.23756  | 2.90E-05 | Cxc9          | 2.191647 | 36.832   | 2.72E-07 | Ic12          | 2.476427 | 28.58037 | 8.10E-06 | Kr118        | 1.359837 | 19.47179 | 0.001769 |
| Fndc1          | 0.998914 | 14.16128 | 0.013121 | Iglt5          | 2.47335  | 44.32915 | 8.58E-09 | Cc1            | 2.357632 | 60.60864  | 2.50E-12 | Cc1           | 2.037751 | 85.16807 | 3.73E-17 | Cg2           | 2.462308 | 63.16272 | 5.33E-13 | Cenpf        | 1.295034 | 18.21843 | 0.002596 |
| Cdkn1c         | 0.915294 | 12.71863 | 0.022222 | Irf1           | 2.416785 | 50.43773 | 5.63E-10 | LOC100910973   | 2.157624 | 117.147   | 2.87E-24 | Gbp2          | 2.010627 | 64.87926 | 6.09E-13 | Irf1          | 2.372082 | 176.1306 | 5.63E-37 | Strn1        | 1.238244 | 13.22129 | 0.016866 |
| Tubb2a         | 0.867463 | 13.98135 | 0.01371  | RT1-CE5        | 2.395544 | 73.59514 | 8.44E-15 | Ifi47          | 2.098927 | 57.99948  | 8.16E-12 | Tap1          | 1.907455 | 95.30556 | 3.99E-19 | Irf1          | 2.362816 | 77.95104 | 4.72E-16 | Respl8       | 1.230208 | 10.8199  | 0.037518 |
| Fbn1           | 0.855746 | 16.90978 | 0.004521 | Gcg            | 2.344072 | 51.2314  | 3.91E-10 | RT1-CE5        | 2.060716 | 69.66441  | 3.78E-14 | Sod2          | 1.726594 | 74.53488 | 6.08E-15 | Il18bp        | 2.218996 | 70.03024 | 2.34E-14 | Ubd          | 1.163883 | 12.02975 | 0.02602  |
| Tpp3p          | 0.84796  | 11.25272 | 0.03772  | Gbp2           | 2.301752 | 36.01777 | 4.38E-07 | Vtn            | 2.053179 | 63.90923  | 5.31E-13 | Pl16          | 1.685699 | 20.45564 | 0.00053  | Tap1          | 2.199114 | 80.2187  | 1.56E-16 | Prc1         | 1.141941 | 11.85299 | 0.027608 |
| Dcn            | 0.847771 | 13.21552 | 0.018217 | LOC100910973   | 2.27818  | 100.0154 | 2.88E-20 | Cfb            | 1.958838 | 34.32074  | 6.39E-07 | Il18bp        | 1.668538 | 60.23339 | 4.48E-12 | Psmb9         | 2.17204  | 86.11889 | 8.56E-18 | Snhg11       | 1.133993 | 11.392   | 0.032197 |
| Col5a1         | 0.843698 | 15.05072 | 0.009483 | Il18bp         | 2.160657 | 43.08236 | 1.54E-08 | C1b            | 1.953533 | 45.1137   | 3.86E-09 | Chi31l        | 1.600684 | 25.49808 | 5.64E-05 | Sod2          | 2.158009 | 59.13942 | 3.28E-12 | Prc1         | 1.100755 | 12.99639 | 0.001829 |
| Spon2          | 0.838161 | 10.65104 | 0.04476  | Cc19           | 2.140553 | 26.10326 | 0.04E-05 | Gbp2           | 1.903764 | 32.2502   | 1.60E-06 | Cc1           | 1.585001 | 11.99459 | 0.002365 | MGC108823     | 2.103887 | 70.7236  | 1.71E-14 | Tm4sf1       | 1.084867 | 34.61262 | 2.71E-06 |
| Sulf2          | 0.82931  | 10.7111  | 0.044537 | Zbed5          | 2.118352 | 121.322  | 7.43E-25 | Cc15           | 1.876298 | 24.90933  | 5.19E-05 | Sst5          | 1.558073 | 21.29714 | 0.000362 | LOC100910973  | 2.103637 | 136.6677 | 1.51E-28 | Tubb4b       | 1.035231 | 30.35696 | 1.95E-05 |
| Igf1           | 0.796871 | 13.26409 | 0.018027 | Tap1           | 2.115825 | 47.7102  | 7.68E-09 | MGC108823      | 1.856786 | 48.6806   | 8.11E-10 | RT1-CE5       | 1.529615 | 60.43312 | 4.44E-12 | Ifi47         | 1.90374  | 59.29368 | 3.16E-12 | Sneg         | 1.01633  | 11.26613 | 0.033235 |
| Ap13a2         | 0.788868 | 12.37871 | 0.025266 | Ifi47          | 2.077844 | 44.61449 | 7.84E-09 | Ptp4a3         | 1.833522 | 65.57231  | 2.37E-13 | Ifi47         | 1.517927 | 50.72313 | 3.52E-10 | Psmb10        | 1.889236 | 89.45102 | 1.92E-18 | Cen7a        | 0.991807 | 12.15251 | 0.024976 |
| Htra3          | 0.772903 | 12.65794 | 0.022472 | LOC10309362    | 2.035129 | 54.04972 | 1.02E-10 | Cox4i2         | 1.749322 | 58.02654  | 8.16E-12 | Tmcp1         | 1.483111 | 65.08611 | 5.85E-13 | Myh11         | 1.887495 | 25.06962 | 4.09E-05 | Hmgb2        | 0.982917 | 14.26822 | 0.010984 |
| Pmp22          | 0.765113 | 13.7336  | 0.00948  | Cb             | 1.979649 | 34.08209 | 1.04E-06 | Fb             | 1.733612 | 44.44351  | 5.25E-09 | MGC108823     | 1.737928 | 45.10029 | 1.44E-08 | Strn1         | 1.783928 | 21.44924 | 0.000208 | Itgat1       | 0.972418 | 14.63985 | 0.00081  |
| C1etm2         | 0.757884 | 11.41822 | 0.036101 | RGD1564664     | 1.901279 | 19.97031 | 0.000667 | Cc19           | 1.697635 | 77.90765  | 7.98E-16 | Cc15          | 1.746568 | 24.68685 | 4.87E-05 | Iap2          | 1.746568 | 24.68685 | 4.87E-05 | Iap2         | 0.962263 | 12.17399 | 0.024828 |
| Rhoj           | 0.70316  | 11.85796 | 0.040775 | Psmb9          | 1.889665 | 40.37884 | 5.84E-08 | Rgd            | 1.691486 | 33.78718  | 0.08E-07 | Psmb9         | 1.361598 | 56.44629 | 2.72E-11 | Igtp          | 1.70263  | 61.55626 | 1.09E-12 | H2afz        | 0.943629 | 27.94476 | 5.41E-05 |
| Cd302          | 0.685096 | 10.39772 | 0.038339 | Myh11          | 1.757848 | 14.4676  | 0.007001 | So2            | 1.684814 | 36.3818   | 2.56E-07 | Myh11         | 1.355665 | 25.95702 | 0.00011  | RT1-CE5       | 1.673431 | 60.23262 | 2.08E-12 | S100a9       | 0.943366 | 11.03927 | 0.035165 |
| Plac9          | 0.655455 | 11.40802 | 0.036143 | RT1-A1         | 1.743746 | 37.96539 | 1.79E-07 | Gj4b           | 1.666506 | 63.2351   | 7.23E-13 | Zbed5         | 1.288899 | 128.0825 | 1.32E-25 | Act2          | 1.671659 | 43.59857 | 6.42E-09 | S100a4       | 0.939875 | 11.09666 | 0.03484  |
| Adamt5         | 0.624879 | 11.22262 | 0.037989 | Psmb8          | 1.685064 | 48.56645 | 1.40E-09 | Il13           | 1.652331 | 56.56693  | 1.57E-11 | Ii33          | 1.263223 | 21.33304 | 0.000358 | Des           | 1.666177 | 65.93026 | 1.55E-13 | Acta         | 0.932174 | 18.28001 | 0.002541 |
| Ccdc80         | 0.598764 | 11.94523 | 0.030073 | Hspa1a         | 1.675041 | 37.20578 | 2.53E-07 | Gbp5           | 1.611807 | 35.28625  | 4.21E-07 | Tubb4b        | 1.259042 | 24.46293 | 8.66E-05 | Tubb4b        | 1.642016 | 62.00163 | 8.86E-13 | Syt5         | 0.918455 | 30.01133 | 2.17E-05 |
| Eva1b          | 0.595385 | 10.79595 | 0.04348  | Psmb10         | 1.674632 | 44.86612 | 5.54E-09 | Tubb3          | 1.257521 | 36.96504  | 2.58E-07 | Cfb           | 1.247557 | 15.08693 | 0.006345 | Stat1         | 1.58937  | 59.24947 | 3.16E-12 | Map1b        | 0.916882 | 8.52033  | 1.46E-05 |
| Pdgfrb         | 0.580126 | 11.11054 | 0.039677 | Igtp           | 1.651101 | 37.8784  | 1.83E-07 | Gbp5           | 1.555448 | 27.30925  | 1.74E-05 | Cc1           | 1.232621 | 74.76152 | 5.91E-15 | Stat1         | 1.571917 | 11.03769 | 0.019574 | Mki67        | 0.915378 | 10.10716 | 0.046723 |
| Rn28s          | 0.567832 | 10.72912 | 0.044399 | RT1-A2         | 1.650969 | 34.07767 | 1.06E-06 | Myb15          | 1.532028 | 13.24788  | 0.00933  | LOC100910973  | 1.232621 | 74.76152 | 5.91E-15 | Pl16          | 1.571917 | 11.03769 | 0.019574 | Acly         | 0.901612 | 15.60977 | 0.007192 |
| Rnd2           | 0.4577   | 10.60464 | 0.044874 | So2            | 1.613965 | 21.28706 | 0.000362 | RT1-A1         | 1.514058 | 35.61377  | 3.65E-07 | RGD1039362    | 1.215814 | 49.01981 | 7.95E-10 | Chi31l        | 1.556368 | 17.15488 | 0.001382 | Acta2        | 0.878796 | 15.98112 | 0.006431 |
| Snx20          | 0.456123 | 10.62879 | 0.04476  | Myo1b          | 1.585707 | 40.27654 | 6.00E-08 | Actg2          | 1.509377 | 17.23629  | 0.00162  | RT1-T24-3     | 1.206638 | 40.25191 | 5.47E-08 | Actg2         | 1.510673 | 26.35173 | 2.30E-05 | Basp1        | 0.871643 | 23.75058 | 0.000032 |
| Fars2          | 0.456121 | 10.62879 | 0.04476  | Psm2           | 1.572002 | 40.15877 | 6.23E-08 | Psmb10         | 1.493954 | 48.91304  | 6.73E-10 | Prrs1         | 1.197633 | 51.42952 | 2.59E-10 | LOC10309362   | 1.500053 | 50.41933 | 2.33E-10 | Id1          | 0.871073 | 16.48279 | 0.005618 |
| Eef1a1         | 0.42482  | 11.97595 | 0.029724 | Gbp5           | 1.571048 | 10.88684 | 0.000276 | Upp1           | 1.420812 | 29.53032  | 5.97E-06 | Psmb8         | 1.177809 | 42.93258 | 1.51E-08 | Psmb8         | 1.487786 | 62.04585 | 8.86E-13 | Cav1         | 0.85687  | 12.76468 | 0.001978 |
| Rp3b           | 0.45908  | 12.81965 | 0.021517 | Vtn            | 1.570304 | 31.30642 | 3.71E-06 | Ndufa4i2       | 1.402045 | 40.18061  | 4.21E-08 | Gbp5          | 1.175648 | 58.3838  | 1.10E-11 | Gbp5          | 1.478361 | 30.86873 | 2.74E-06 | LOC100910973 | 0.851831 | 31.36604 | 1.32E-05 |
| Rpl41          | 0.47587  | 14.20909 | 0.012969 | Tpm1           | 1.510181 | 29.63741 | 8.05E-06 | Psmb9          | 1.385757 | 39.90074  | 4.72E-08 | Psm2          | 1.166236 | 34.46776 | 7.80E-07 | Psm2          | 1.454768 | 55.08487 | 2.39E-11 | Akap2        | 0.848857 | 21.8049  | 0.000747 |
| Ropgrip1       | 0.4884   | 10.42614 | 0.048085 | RT1-T24-3      | 1.484155 | 25.28972 | 5.64E-05 | Acta2          | 1.369605 | 26.14947  | 2.94E-05 | Manf          | 1.116135 | 52.70866 | 1.75E-10 | Tapb          | 1.245472 | 40.92518 | 2.30E-08 | Lmnk1b       | 0.843758 | 16.4678  | 0.005618 |
| Sh3bp4         | 0.4923   | 10.38446 | 0.048363 | C2             | 1.482275 | 24.57721 | 7.78E-05 | Igtp           | 1.369458 | 51.19432  | 2.20E-10 | Psmb10        | 1.161393 | 56.22742 | 2.93E-11 | RT1-A1        | 1.41004  | 36.06472 | 2.55E-07 | Or163        | 0.827627 | 17.23232 | 0.004051 |
| Prrg2          | 0.49703  | 10.37237 | 0.048518 | Psm1           | 1.450897 | 38.17181 | 1.22E-13 | Cc19           | 1.365344 | 33.80382  | 8.47E-05 | Mx1           | 1.115041 | 30.43183 | 5.96E-06 | Tubb3         | 1.401417 | 31.04371 | 2.55E-06 | Tubalc1      | 0.823329 | 13.95191 | 0.012293 |
| Rpl37a         | 0.50982  | 17.79828 | 0.003015 | B2m            | 1.444527 | 93.64576 | 5.40E-19 | Msn            | 1.320055 | 35.07967  | 4.57E-07 | Vcan          | 1.100804 | 17.78914 | 0.001853 | Manf          | 1.381821 | 47.65648 | 8.94E-10 | Psmb9        | 0.821338 | 18.5829  | 0.00241  |
| Slc16a10       | 0.52103  | 10.63441 | 0.04776  | LOC108348108   | 1.429395 | 25.45716 | 5.24E-05 | Chi31          | 1.307671 | 19.154697 | 0.047909 | C4b           | 1.069712 | 36.31228 | 3.43E-07 | Sneg          | 1.364891 | 14.92411 | 0.003737 | Efr3a        | 0.819095 | 23.74029 | 0.000311 |
| Mtpap          | 0.52103  | 10.63442 | 0.04476  | Hspa1b         | 1.419981 | 25.78021 | 4.66E-05 | Tm4sf1         | 1.305742 | 41.02811  | 2.82E-08 | Tapb          | 1.067179 | 34.79299 | 6.70E-07 | Cc19          | 1.347162 | 32.44289 | 1.33E-06 | Cdc20        | 0.806157 | 14.6925  | 0.009591 |
| Ctndd2         | 0.52103  | 10.63442 | 0.04476  | Stat1          | 1.389899 | 30.05502 | 6        |                |          |           |          |               |          |          |          |               |          |          |          |              |          |          |          |

|              |          |          |          |           |          |          |          |           |          |          |            |          |          |          |          |          |          |          |          |              |          |          |          |
|--------------|----------|----------|----------|-----------|----------|----------|----------|-----------|----------|----------|------------|----------|----------|----------|----------|----------|----------|----------|----------|--------------|----------|----------|----------|
| Mrlap1       | -0.70653 | 17.37884 | 0.003604 | Sic15a3   | 1.024295 | 12.31372 | 0.016921 | Sectm1b   | 0.995574 | 14.07878 | 0.006441   | Pla2g16  | 0.708053 | 18.51191 | 0.001291 | Top2a    | 0.980492 | 9.455641 | 0.03511  | Nme1         | 0.680422 | 19.61806 | 0.001712 |
| Oas1b        | -0.70963 | 10.3539  | 0.048844 | Jun       | 1.023534 | 23.12278 | 0.000157 | Marcks1   | 0.988502 | 26.15947 | 2.94E-05   | Cyp7b1   | 0.699735 | 15.74673 | 0.000464 | Top2a    | 0.980333 | 20.16004 | 0.000369 | Tmed7        | 0.677428 | 16.06439 | 0.006345 |
| Ef13a        | -0.71337 | 10.9635  | 0.041442 | Cd40      | 1.018509 | 13.58659 | 0.008877 | Dnasel1   | 0.978808 | 22.27509 | 0.000165   | Scarf1   | 0.690235 | 15.54483 | 0.000513 | Mcam     | 0.970094 | 15.96194 | 0.002344 | Stat1        | 0.674879 | 11.39608 | 0.032197 |
| Ank1         | -0.71481 | 10.34164 | 0.049007 | Irf7      | 1.016215 | 11.38541 | 0.02543  | Mfge8     | 0.976143 | 44.69586 | 4.69E-09   | Mvp      | 0.680036 | 16.74145 | 0.002961 | Plha     | 0.968558 | 35.54531 | 3.18E-07 | Mrlp32       | 0.664974 | 14.99848 | 0.005854 |
| Isg20        | -0.71483 | 10.30705 | 0.049607 | Irgm      | 1.012533 | 15.44051 | 0.004616 | Actb      | 0.972814 | 105.2861 | 1.04E-21   | Tubb5    | 0.679708 | 24.88008 | 9.44E-05 | Adla     | 0.966169 | 21.69585 | 0.00019  | Tubb6        | 0.664644 | 10.19684 | 0.054546 |
| Pdgbp        | -0.71581 | 10.80705 | 0.042446 | MGC105567 | 1.012423 | 18.40286 | 0.001337 | Cd36      | 0.970006 | 15.93681 | 0.002848   | Xdh      | 0.676611 | 15.2764  | 0.005798 | Thy1     | 0.962922 | 20.63294 | 0.000303 | Gc1c         | 0.663211 | 10.42332 | 0.042624 |
| RGD1560394   | -0.71621 | 14.73976 | 0.010386 | Pycr3     | 0.987862 | 19.53993 | 0.000817 | Rdh7      | 0.963084 | 16.63319 | 0.002137   | Sp110    | 0.674762 | 16.81429 | 0.002866 | Tspan15  | 0.962637 | 18.35957 | 0.000833 | Epas1        | 0.662556 | 15.79221 | 0.006913 |
| Lamp2        | -0.71912 | 12.99973 | 0.019716 | Cm1       | 0.995614 | 17.90899 | 1.75E-05 | Cyba      | 0.957109 | 12.40021 | 0.013157   | Marck1   | 0.671738 | 23.27651 | 0.000146 | Mdh2     | 0.961788 | 31.81825 | 3.28E-07 | Mrlp15       | 0.656077 | 15.70157 | 0.007081 |
| Spint1       | -0.72048 | 15.86038 | 0.006829 | C1s       | 0.993198 | 14.93194 | 0.00577  | Prosl     | 0.951879 | 22.71063 | 0.000137   | Dtx3l    | 0.668731 | 14.11311 | 0.009798 | Ecrr1    | 0.960829 | 19.44309 | 0.00051  | LOC108348108 | 0.660136 | 11.25268 | 0.033245 |
| Hibadh       | -0.72264 | 11.03344 | 0.040702 | Kcnj8     | 0.989731 | 13.36881 | 0.007316 | Vcl       | 0.946069 | 22.41231 | 0.000157   | Pelo     | 0.661727 | 17.48099 | 0.0021   | Lgals13p | 0.957514 | 24.60708 | 5.04E-05 | Usp14        | 0.660128 | 14.95524 | 0.008725 |
| Foxa2        | -0.72503 | 11.05141 | 0.040471 | Maged2    | 0.989458 | 25.49531 | 5.23E-05 | Tapbp     | 0.945315 | 16.54527 | 0.002212   | Plat1a   | 0.65556  | 15.9576  | 0.004216 | Stat2    | 0.952371 | 22.2967  | 0.000147 | Rpia         | 0.654938 | 14.47469 | 0.010133 |
| Mtsx1        | -0.72542 | 11.90656 | 0.030397 | Lyge6     | 0.978762 | 22.91403 | 0.000173 | Parp14    | 0.945211 | 13.35815 | 0.008926   | Actb     | 0.654405 | 104.7564 | 8.45E-21 | Alkap2   | 0.949555 | 21.96902 | 0.000169 | Ev1s         | 0.654432 | 27.52695 | 6.48E-05 |
| LOC498368    | -0.73019 | 12.69071 | 0.022316 | Phf20     | 0.972767 | 15.34418 | 0.004812 | Mgtr3     | 0.927889 | 18.51955 | 0.000925   | Egr1     | 0.652089 | 11.93133 | 0.024123 | Gjx4     | 0.947703 | 23.30327 | 9.35E-05 | Riok3        | 0.654095 | 15.02515 | 0.008548 |
| Cmb1         | -0.73704 | 11.57725 | 0.034007 | Cdk4      | 0.95987  | 25.94654 | 4.32E-05 | Tpm1      | 0.924162 | 16.06604 | 0.0027     | Cnn1     | 0.640863 | 11.97604 | 0.023786 | Mk1      | 0.946261 | 11.76949 | 0.014576 | Hmmr         | 0.654019 | 12.62643 | 0.020681 |
| Der13        | -0.73968 | 14.71385 | 0.010504 | Ptpn1     | 0.95924  | 11.24454 | 0.026404 | Bcam      | 0.924081 | 15.75791 | 0.003097   | S1pr3    | 0.632564 | 13.46138 | 0.0129   | Pttg1    | 0.944408 | 17.32076 | 0.001287 | Ranbp2       | 0.653654 | 16.09553 | 0.006345 |
| Ddc          | -0.7401  | 11.43457 | 0.035941 | Esam      | 0.957075 | 12.59208 | 0.015074 | Id3       | 0.921709 | 18.35894 | 0.000997   | Msr1b    | 0.631565 | 17.56088 | 0.002064 | Caln3    | 0.938155 | 25.97248 | 2.72E-05 | Cct8         | 0.653459 | 16.46437 | 0.005618 |
| Top1         | -0.74251 | 10.28858 | 0.049618 | Myf6b     | 0.956815 | 57.05642 | 2.48E-11 | Erfk2e    | 0.91527  | 19.9059  | 0.000489   | Ar18a    | 0.609429 | 17.46079 | 0.0021   | Myf6b    | 0.93805  | 88.96594 | 2.33E-18 | Rbm8a        | 0.64851  | 22.92371 | 0.000444 |
| LOC100362110 | -0.74546 | 11.83918 | 0.030798 | Snmp70    | 0.956732 | 15.7701  | 0.003991 | Cnp       | 0.910208 | 15.04074 | 0.004322   | Runx1    | 0.603802 | 17.58667 | 0.002048 | Cd9      | 0.93721  | 17.36207 | 0.001268 | Yae1         | 0.647593 | 14.58375 | 0.009918 |
| Lgals9       | -0.74743 | 10.30889 | 0.049607 | Prrs1     | 0.9506   | 14.09059 | 0.008135 | Tspan15   | 0.907974 | 13.85946 | 0.007084   | Pid1     | 0.605167 | 16.06193 | 0.004099 | Adp1a    | 0.935545 | 18.71923 | 0.00071  | Cacna2d1     | 0.646656 | 12.55487 | 0.021297 |
| Des1         | -0.74753 | 10.07817 | 0.019271 | Ndufa4l2  | 0.950595 | 15.06131 | 0.005462 | Cdkn1c    | 0.907875 | 11.9701  | 0.015599   | Nkfb2    | 0.5995   | 13.22539 | 0.014201 | Pola9    | 0.934544 | 25.52098 | 3.35E-05 | Uchl1        | 0.646258 | 10.71385 | 0.038106 |
| Abcn7f3b     | -0.75221 | 10.77254 | 0.043723 | Myf9      | 0.949653 | 27.97082 | 1.74E-05 | Ano1      | 0.905952 | 16.2935  | 0.002431   | Vtn      | 0.595713 | 13.3576  | 0.013345 | Parp9    | 0.932381 | 21.60434 | 0.000197 | Golg1b       | 0.645826 | 13.33756 | 0.01629  |
| Otc          | -0.75286 | 12.29768 | 0.025756 | Dnppp     | 0.942273 | 17.6074  | 0.001845 | Mcm       | 0.904886 | 14.97962 | 0.004449   | Grr      | 0.587685 | 14.8716  | 0.006566 | RT1-A2   | 0.931529 | 20.41971 | 0.00333  | Thyl1        | 0.644752 | 11.79122 | 0.033235 |
| Paps2        | -0.75629 | 10.61319 | 0.04482  | Spt4      | 0.935609 | 24.79309 | 7.09E-05 | Cyba      | 0.902923 | 13.36845 | 0.000102   | Cyk      | 0.582044 | 15.37313 | 0.005656 | Mfge8    | 0.930602 | 41.47461 | 1.75E-08 | Rho2         | 0.643971 | 18.89002 | 0.002209 |
| Atps5mc2     | -0.76003 | 16.53787 | 0.005238 | Mett19    | 0.935866 | 16.12931 | 0.003418 | Ppp1r12c  | 0.898426 | 18.25235 | 0.001051   | Smtn     | 0.581203 | 10.70227 | 0.041701 | Sic12a   | 0.930471 | 18.56056 | 0.000759 | Nci          | 0.641753 | 18.18625 | 0.002612 |
| Vcjp1p1      | -0.76211 | 10.01508 | 0.00432  | Sic39a1   | 0.9353   | 18.36812 | 0.001353 | Insp4b    | 0.895146 | 19.56475 | 0.001386   | Tubb4b   | 0.577977 | 10.86672 | 0.038773 | Myo1b    | 0.930307 | 22.8958  | 0.000147 | Ptpn1        | 0.641082 | 14.48181 | 0.010133 |
| Sphkap       | -0.76412 | 12.54521 | 0.023377 | Selenot   | 0.934903 | 16.37459 | 0.003081 | MGC105567 | 0.893206 | 17.44826 | 0.00148    | Wars     | 0.577659 | 12.41883 | 0.020198 | Cspg4    | 0.930167 | 18.14411 | 0.000901 | Igtp         | 0.638145 | 11.93376 | 0.02681  |
| Rnf208       | -0.7653  | 12.04645 | 0.028759 | Hmxo2     | 0.93169  | 16.52988 | 0.002883 | Sic24a    | 0.892128 | 14.27889 | 0.005986   | Nmi      | 0.5765   | 16.18246 | 0.003868 | Alkap2   | 0.9289   | 25.38882 | 3.52E-05 | Ev1s         | 0.637689 | 14.47664 | 0.010133 |
| Ube2b        | -0.76632 | 10.89615 | 0.042446 | Stat2     | 0.928893 | 13.47272 | 0.01045  | Spink8    | 0.87949  | 12.19828 | 0.01416    | Myf9     | 0.569967 | 24.91702 | 7.05E-05 | Cnn3     | 0.927188 | 26.5841  | 2.05E-05 | Hspab1       | 0.634391 | 18.01729 | 0.037518 |
| Me1          | -0.76681 | 10.81975 | 0.043103 | Cox4i2    | 0.928587 | 14.17381 | 0.000284 | C1qtnf2   | 0.875862 | 21.14109 | 0.000284   | Msn      | 0.566626 | 14.18307 | 0.000929 | Khsrp    | 0.922816 | 20.70091 | 0.000295 | Khsrp        | 0.633564 | 15.06734 | 0.008458 |
| Cct2         | -0.768   | 10.70267 | 0.044577 | Oas2      | 0.928541 | 11.4269  | 0.025019 | Ctrb1     | 0.875449 | 16.79982 | 0.001981   | Farp1    | 0.566534 | 13.7434  | 0.011297 | Arfip1p  | 0.91711  | 20.31076 | 0.000347 | Arfip1p      | 0.62691  | 10.61963 | 0.39557  |
| Rbbp7        | -0.76802 | 11.39751 | 0.036191 | Sic25a5   | 0.92658  | 24.33546 | 8.73E-05 | Ptgis     | 0.865161 | 52.67722 | 1.50E-10   | Myf6b    | 0.565161 | 52.67722 | 1.50E-10 | Adgre5   | 0.915467 | 22.53082 | 0.000134 | Tubb5        | 0.626822 | 16.97602 | 0.000545 |
| Krtcap3      | -0.77185 | 15.99699 | 0.006525 | Marcks1   | 0.923453 | 18.5349  | 0.001272 | Map1l3c3a | 0.87315  | 39.96467 | 4.64E-08   | Tpm2     | 0.562975 | 23.70171 | 0.000213 | Ctnnb1   | 0.91222  | 22.25353 | 0.000148 | Ldhb         | 0.625634 | 17.23781 | 0.004051 |
| Nr1c1        | -0.77211 | 10.48116 | 0.047315 | Pncr1     | 0.922889 | 19.47976 | 0.000831 | Pdgfrb    | 0.871306 | 37.09583 | 1.85E-07   | Nkfb1    | 0.559207 | 15.11662 | 0.000623 | Marcks1  | 0.911786 | 27.37307 | 1.42E-05 | Tmem14c      | 0.624947 | 20.27292 | 0.001404 |
| Mdh1         | -0.77262 | 10.87661 | 0.042446 | Eef1a1    | 0.915861 | 99.99811 | 3.93E-20 | Eef1a1    | 0.870905 | 33.16221 | 1.06E-06   | Ppp1r12c | 0.557535 | 13.68481 | 0.011603 | Farp5    | 0.907136 | 10.03514 | 0.028327 | Rcn3b        | 0.624914 | 16.37966 | 0.005767 |
| Fdps         | -0.77418 | 10.55522 | 0.04593  | Pde3a     | 0.910328 | 14.02947 | 0.007083 | Lamb2     | 0.869413 | 20.60512 | 0.000359   | Pldb2    | 0.554484 | 16.63147 | 0.003121 | Farp5    | 0.905554 | 20.6941  | 0.000295 | Scn8s        | 0.623692 | 37.72335 | 7.06E-07 |
| Trappc9      | -0.77448 | 13.37921 | 0.017291 | Insp4b    | 0.906109 | 14.60329 | 0.006628 | Pid1      | 0.867389 | 17.47684 | 0.00147    | Dkn1     | 0.553366 | 14.2125  | 0.00947  | Nr1b1    | 0.89607  | 57.16276 | 8.63E-12 | Caln1        | 0.62252  | 38.705   | 4.60E-07 |
| Ctsc         | -0.77829 | 15.21625 | 0.004814 | RT1-CE14  | 0.904377 | 12.60326 | 0.019131 | Act2      | 0.856177 | 12.57509 | 0.003885   | Fklc1    | 0.552429 | 16.83748 | 0.004665 | Crp1     | 0.894246 | 36.03547 | 2.56E-07 | Eno1         | 0.621094 | 15.94033 | 0.006497 |
| Rrp1         | -0.77969 | 11.89237 | 0.030397 | Ifi27     | 0.903691 | 14.66717 | 7.84E-09 | Gucy1a1   | 0.854109 | 14.27089 | 0.005986   | Mfge8    | 0.552363 | 25.2057  | 6.31E-05 | Scarf1   | 0.892865 | 19.495   | 0.000499 | Cmpk1        | 0.617581 | 13.22857 | 0.016866 |
| Enpp5        | -0.78229 | 14.03624 | 0.013684 | Ube2v1    | 0.902753 | 17.99362 | 0.001595 | Peil1     | 0.853615 | 16.16688 | 0.002579   | Nsun2    | 0.551419 | 11.99596 | 0.023656 | Psm7a    | 0.888557 | 55.17002 | 2.34E-11 | Cox4i2       | 0.617566 | 12.88644 | 0.019024 |
| Uba2         | -0.78465 | 10.84306 | 0.042886 | Pld1      | 0.900228 | 15.95208 | 0.003698 | Steap4    | 0.853082 | 134.3062 | 0.005978   | Ifi1     | 0.550154 | 21.10448 | 0.000396 | Flna1    | 0.879148 | 12.59669 | 0.001059 | Ndufa4l2     | 0.617039 | 11.65162 | 0.30032  |
| Clock        | -0.78706 | 11.842   | 0.030798 | Ckn1a1    | 0.899413 | 16.85004 | 0.002557 | Bst2      | 0.853015 | 13.94464 | 0.006874   | Birc3    | 0.549548 | 20.91736 | 0.000428 | Nampt    | 0.878327 | 32.35154 | 1.38E-06 | Ppp1r2       | 0.616796 | 14.93651 | 0.008755 |
| Dctn6        | -0.78985 | 11.07979 | 0.040016 | LOC498592 | 0.898173 | 17.5189  | 0.001901 | Pfkfb     | 0.845581 | 13.21113 | 0.009462   | Etck2    | 0.548682 | 10.88414 | 0.038768 | Phtac2   | 0.875228 | 21.60792 | 0.000197 | Tmed5        | 0.61612  | 14.52034 | 0.010068 |
| Hmrna2b1     | -0.79117 | 12.71959 | 0.022222 | Psmal1    | 0.897641 | 18.85964 | 0.00102  | Csk       | 0.840622 | 18.17877 | 0.001067   | Vps3r3   | 0.545373 | 14.57397 | 0.008005 | Tor1a1p1 | 0.874478 | 21.90731 | 0.000173 | Myo1b        | 0.615146 | 16.55777 | 0.014147 |
| Usp10        | -0.79187 | 10.55709 | 0.003351 | Gabb1r    | 0.897408 | 16.47893 | 0.002993 | Cavin3    | 0.836527 | 26.57853 | 2.49E-05</ |          |          |          |          |          |          |          |          |              |          |          |          |

|              |           |          |          |          |          |          |          |          |           |          |          |           |          |          |          |              |          |          |          |         |          |          |          |
|--------------|-----------|----------|----------|----------|----------|----------|----------|----------|-----------|----------|----------|-----------|----------|----------|----------|--------------|----------|----------|----------|---------|----------|----------|----------|
| Sc5d         | -0.89578  | 11.79984 | 0.03131  | Id3      | 0.802999 | 11.40614 | 0.025224 | Maged2   | 0.743715  | 19.7471  | 0.000525 | Fstl1     | 0.368516 | 16.21743 | 0.003818 | PsmA5        | 0.794975 | 22.09082 | 0.000161 | Papola  | 0.565463 | 11.40266 | 0.032197 |
| Rtkp4        | -0.89697  | 11.68299 | 0.032438 | Psmid12  | 0.801225 | 13.20728 | 0.017102 | Tmem140  | 0.73794   | 12.00207 | 0.015371 | Cdk4      | 0.368059 | 10.30208 | 0.049424 | Dkc1         | 0.78973  | 18.61766 | 0.000742 | Tubal1a | 0.565394 | 30.30544 | 1.95E-05 |
| Fkbp11       | -0.897    | 11.64425 | 0.032972 | Pkp      | 0.801187 | 11.64425 | 0.028016 | Colc12   | 0.734818  | 12.19784 | 0.01416  | Gapdh     | 0.350434 | 10.28064 | 0.0497   | Bcl2         | 0.789025 | 19.0655  | 0.000606 | Ano1    | 0.564529 | 9.955596 | 0.049732 |
| Pgrmc1       | -0.89705  | 16.02772 | 0.006327 | Prkx2    | 0.799331 | 33.4261  | 1.37E-06 | Ptms     | 0.73251   | 38.08756 | 1.14E-07 | Cox4i2    | 0.348099 | 10.52199 | 0.044969 | Cox4i2       | 0.78836  | 13.8663  | 0.005894 | Slf2    | 0.564106 | 10.77544 | 0.037901 |
| Erfec1       | -0.90105  | 14.55202 | 0.011119 | Mpv      | 0.797809 | 9.838476 | 0.045658 | Tubb2a   | 0.7328174 | 11.87773 | 0.02916  | Lmo1      | 0.328174 | 11.87773 | 0.02916  | Cdkn2c       | 0.784316 | 12.5619  | 0.010303 | Mprp15  | 0.561197 | 13.24768 | 0.016799 |
| Evl          | -0.90249  | 14.03142 | 0.013684 | Ybn1     | 0.794685 | 16.89079 | 0.00275  | Psmb3    | 0.732028  | 24.24323 | 6.83E-05 | Ndc       | 0.310403 | 19.83637 | 0.000707 | Ednrb        | 0.783574 | 13.96427 | 0.005679 | Lmb2    | 0.561351 | 11.91186 | 0.026947 |
| Paps1        | -0.90601  | 11.38035 | 0.036137 | Klf9     | 0.793439 | 12.76643 | 0.04058  | Cebpb    | 0.73071   | 10.69536 | 0.026252 | Bdrb1r1   | 0.308627 | 12.97443 | 0.015772 | Ctcf         | 0.783149 | 19.82175 | 0.000451 | Sfb2    | 0.559525 | 16.81414 | 0.004853 |
| Os4          | -0.90613  | 14.41107 | 0.010186 | Bmyr     | 0.792316 | 12.67393 | 0.014678 | Lmna     | 0.728151  | 26.19722 | 2.92E-05 | Rpl7      | 0.295369 | 17.01538 | 0.002593 | Ctcf         | 0.780768 | 27.2548  | 1.49E-05 | Inpa4b  | 0.559517 | 10.01126 | 0.048513 |
| Maged1       | -0.90834  | 13.08367 | 0.019271 | C1       | 0.792666 | 15.80825 | 0.00395  | Atpf51a  | 0.728065  | 19.97389 | 0.000476 | Prx2      | 0.292211 | 10.7999  | 0.039812 | Cyba         | 0.78033  | 22.47032 | 0.000137 | Hgmt1   | 0.559127 | 11.42194 | 0.032121 |
| Hspad1       | -0.91318  | 12.65296 | 0.02274  | Bsg      | 0.792329 | 30.59664 | 5.27E-06 | Dnm1     | 0.726677  | 12.60359 | 0.012081 | Eef1a1    | 0.278877 | 18.07695 | 0.001063 | Hmoab        | 0.778532 | 17.15276 | 0.001382 | Hmgbl1  | 0.559003 | 15.39234 | 0.007619 |
| Lgals3bp     | -0.91515  | 19.21902 | 0.001706 | Cf1      | 0.791975 | 33.39171 | 1.37E-06 | Cd59     | 0.725907  | 15.67942 | 0.003216 | Reg1a     | 0.277398 | 10.61582 | 0.043283 | Nucks1       | 0.777747 | 19.75535 | 0.000443 | Smc3    | 0.557621 | 10.4154  | 0.042687 |
| Mett19       | -0.91989  | 15.2645  | 0.008892 | Fbxo6    | 0.791704 | 13.09382 | 0.012325 | Ahrhg25  | 0.725238  | 12.90506 | 0.010798 | Cdg3      | 0.224421 | 12.2231  | 0.021795 | B2m          | 0.777457 | 46.11683 | 1.88E-09 | Ywhag   | 0.557466 | 18.53321 | 0.00241  |
| Rab3a        | -0.92147  | 12.37135 | 0.025266 | Ghlitm   | 0.789643 | 11.48767 | 0.024287 | Cnn1     | 0.719577  | 9.404777 | 0.042885 | Rpl23     | -0.23718 | 11.08056 | 0.035823 | Ahrhg25      | 0.776763 | 16.75573 | 0.001675 | Arf16pe | 0.557081 | 10.63039 | 0.039524 |
| Klfc3        | -0.92735  | 10.99532 | 0.041057 | Clec2g   | 0.788897 | 17.15255 | 0.00223  | Cdc42ep4 | 0.716337  | 12.14965 | 0.014412 | Rps28     | -0.24794 | 14.0647  | 0.00996  | Page1        | 0.775226 | 12.68172 | 0.009864 | Adrm1   | 0.556481 | 11.27539 | 0.033235 |
| Atp2a3       | -0.92878  | 11.01653 | 0.040813 | Poir2m   | 0.787685 | 14.6852  | 0.006431 | Lgal81   | 0.714659  | 12.1778  | 0.014267 | Rpl24     | -0.27437 | 11.99575 | 0.023656 | Epas1        | 0.770937 | 17.19601 | 0.00136  | Notch3  | 0.555558 | 12.18585 | 0.024828 |
| Rab3b        | -0.92907  | 14.85013 | 0.010186 | Hspa14   | 0.786811 | 10.8192  | 0.031143 | Rarres2  | 0.713357  | 30.62832 | 3.59E-06 | Dus8p     | -0.28118 | 10.4744  | 0.045857 | Page1        | 0.76978  | 16.73146 | 0.00169  | Hspa5   | 0.553917 | 15.17325 | 0.008146 |
| Sec61b       | -0.93173  | 26.49503 | 8.15E-05 | Cdc3c1   | 0.786479 | 10.3748  | 0.036739 | Socs1    | 0.711869  | 18.6305  | 0.000877 | Tpt1      | -0.28442 | 15.3882  | 0.00555  | Ppp1r12c     | 0.769543 | 15.7245  | 0.002612 | Drgk1   | 0.553686 | 15.57068 | 0.007192 |
| Hnmpd        | -0.93196  | 14.5986  | 0.010925 | Etf4e3   | 0.784805 | 11.79737 | 0.021139 | Emp2     | 0.701592  | 10.9032  | 0.024061 | Emp2      | -0.29655 | 12.58762 | 0.018856 | Tmem176b     | 0.769366 | 10.60864 | 0.022906 | Ndufab1 | 0.552921 | 13.77272 | 0.01345  |
| Cox17        | -0.93604  | 14.69247 | 0.010546 | Srpra    | 0.7845   | 11.95317 | 0.019876 | Ferm12   | 0.697899  | 14.26992 | 0.005986 | Epob113   | -0.30187 | 12.04918 | 0.023226 | Dctp1        | 0.769006 | 12.52507 | 0.010438 | Ebag9   | 0.551874 | 11.27728 | 0.033235 |
| Ghr          | -0.94066  | 15.29604 | 0.008818 | Actb     | 0.783489 | 49.45905 | 8.40E-12 | Pgf      | 0.697261  | 14.13632 | 0.006287 | Czh110    | -0.32273 | 12.43291 | 0.020198 | Actp15a      | 0.768783 | 28.09713 | 1.01E-05 | Ubln1   | 0.551155 | 11.98688 | 0.026302 |
| Sr4          | -0.95055  | 24.29706 | 0.000214 | Csrp1    | 0.782695 | 17.50952 | 0.001901 | Igfbr4   | 0.695804  | 14.48456 | 0.005536 | Elob      | -0.33789 | 10.87901 | 0.038768 | Tpm3         | 0.768032 | 16.44235 | 0.001904 | Smcarc1 | 0.550155 | 12.23644 | 0.02439  |
| Cla2a        | -0.95588  | 22.19654 | 0.005536 | Ckb      | 0.780265 | 10.6066  | 0.033893 | Slc12a2  | 0.693608  | 9.805526 | 0.037153 | Ckb       | -0.34989 | 11.23708 | 0.033035 | Actp15b      | 0.767599 | 37.38696 | 1.36E-07 | Hipk1   | 0.549887 | 10.30964 | 0.044086 |
| LOC10348108  | -0.95719  | 13.969   | 0.01371  | Rbm      | 0.779165 | 11.08132 | 0.028341 | Tcf4     | 0.68583   | 14.51185 | 0.005492 | Actp15b   | -0.35075 | 15.96715 | 0.004216 | Ipst1        | 0.761468 | 20.1242  | 0.000371 | Emc2    | 0.549678 | 10.94208 | 0.036302 |
| Dhrs7        | -0.95841  | 14.80296 | 0.010186 | Ndrp2    | 0.779071 | 10.21669 | 0.039313 | Mxd4     | 0.687376  | 13.09006 | 0.010034 | Ndufab13  | -0.35134 | 11.97096 | 0.023786 | Dbn1         | 0.759469 | 15.2322  | 0.003211 | Pgam1   | 0.549471 | 13.47158 | 0.015377 |
| Tspan13      | -0.97687  | 19.10339 | 0.001762 | Tspan3   | 0.776512 | 10.17777 | 0.000397 | Klf9     | 0.684968  | 12.1309  | 0.014522 | Rps23     | -0.35206 | 19.45285 | 0.000847 | Gria6        | 0.759395 | 19.86305 | 0.003838 | Chptn   | 0.54805  | 10.9298  | 0.036428 |
| Slc38a4      | -0.98142  | 14.46128 | 0.011585 | Stx4     | 0.776446 | 9.791787 | 0.046528 | Slc48a1  | 0.683612  | 10.62078 | 0.026997 | Cox8a     | -0.35444 | 17.52197 | 0.002094 | Tcf19        | 0.75531  | 10.64791 | 0.022623 | Dtd1    | 0.544481 | 10.38593 | 0.04313  |
| Idi1         | -0.98174  | 13.4611  | 0.016866 | Mrfap1   | 0.775239 | 28.22661 | 1.54E-05 | Bmp5     | 0.65705   | 13.71715 | 0.007527 | Serf2     | -0.35728 | 14.78946 | 0.007246 | Nduf8        | 0.754313 | 18.75465 | 0.000699 | Nduf8   | 0.541871 | 13.98433 | 0.012217 |
| Robo2        | -0.98477  | 16.72684 | 0.004889 | Ppp1r12c | 0.774883 | 10.67272 | 0.033081 | Csrp1    | 0.674916  | 16.05892 | 0.0027   | Ddx3      | -0.35844 | 13.98703 | 0.010147 | Oas12        | 0.750827 | 11.33839 | 0.017504 | Prkar2b | 0.541745 | 12.78049 | 0.019738 |
| Cdh1         | -0.98501  | 16.72311 | 0.004889 | Msl1     | 0.773458 | 11.64995 | 0.023923 | Stbd1    | 0.673459  | 11.76454 | 0.017004 | Cst3      | -0.36192 | 13.93612 | 0.010332 | Oas12        | 0.749962 | 21.58969 | 0.000197 | Nudt4   | 0.541522 | 12.80474 | 0.019024 |
| LOC100910996 | -0.98534  | 22.39358 | 0.000507 | Iah1     | 0.769031 | 11.26525 | 0.026404 | Msrb1    | 0.670245  | 10.53335 | 0.027795 | Gng5      | -0.37076 | 12.86777 | 0.016629 | LOC108348108 | 0.749482 | 10.81202 | 0.021267 | Slc38a4 | 0.541504 | 10.12947 | 0.046441 |
| Dnpep        | -0.9872   | 15.41675 | 0.008486 | Tubb5    | 0.768787 | 14.50785 | 0.006883 | Thra     | 0.668063  | 10.40192 | 0.029092 | Atpf5mg   | -0.37076 | 12.86777 | 0.016629 | Actr2        | 0.748194 | 18.29852 | 0.000847 | Spcc2   | 0.541472 | 15.28058 | 0.007913 |
| Kcnj11       | -0.99333  | 19.01609 | 0.001805 | Urod     | 0.768268 | 10.95904 | 0.029849 | Arcp1b   | 0.667976  | 14.00599 | 0.006674 | Atpf5p    | -0.3829  | 11.91323 | 0.02415  | Nkr2b        | 0.747964 | 13.81348 | 0.006015 | Tpr     | 0.539667 | 10.85608 | 0.037198 |
| Esp12        | -0.99451  | 18.68457 | 0.002024 | Rpl7     | 0.767986 | 58.63061 | 1.21E-11 | Vsn11    | 0.667341  | 14.66821 | 0.005158 | Vsn11     | -0.38884 | 11.35242 | 0.031151 | Nkr2b        | 0.746252 | 12.56755 | 0.010295 | Elf3a   | 0.539573 | 12.36486 | 0.023268 |
| Ndufb2       | -0.10219  | 28.29022 | 3.51E-05 | Lgals3bp | 0.767889 | 10.6395  | 0.033591 | Jag1     | 0.667229  | 10.00933 | 0.034504 | Hnrrnp    | -0.39069 | 11.84121 | 0.024665 | Psmid13      | 0.744238 | 20.55112 | 0.000315 | Ranbp1  | 0.53792  | 11.15548 | 0.034793 |
| Id4          | -0.10472  | 13.45342 | 0.016866 | Kpnb1    | 0.767539 | 13.84845 | 0.020696 | Khrdb3   | 0.666373  | 10.49438 | 0.02805  | Cox7a2    | -0.39148 | 13.56433 | 0.012271 | Cers5        | 0.742315 | 16.42458 | 0.001916 | Ednra   | 0.536456 | 11.23587 | 0.033493 |
| Tmem206      | -0.102597 | 10.93621 | 0.041731 | Tmem140  | 0.766618 | 10.23932 | 0.03893  | Tprg11   | 0.665742  | 12.69436 | 0.011712 | Hist3h2ba | -0.39731 | 10.44649 | 0.046441 | MGC105567    | 0.742132 | 13.2419  | 0.007702 | Ldha    | 0.535287 | 10.76635 | 0.037901 |
| Cla2a        | -0.10315  | 18.39936 | 0.002298 | Klhl42   | 0.765624 | 14.3478  | 0.07304  | Gucylb1  | 0.660799  | 9.660235 | 0.039218 | Ndufab1   | -0.40081 | 10.32719 | 0.048905 | Ndufab1      | 0.741797 | 17.44559 | 0.001222 | Psmid11 | 0.534663 | 10.01073 | 0.048513 |
| IFZ7         | -0.103812 | 78.53809 | 2.99E-15 | Cdc42ep4 | 0.762997 | 11.26494 | 0.026404 | Cdt24    | 0.660475  | 14.35641 | 0.005886 | Nkr1      | -0.40248 | 11.91068 | 0.02415  | Prrm1        | 0.741027 | 24.77897 | 4.70E-05 | Prrm1   | 0.534281 | 10.27833 | 0.044232 |
| Fos          | -0.103819 | 13.97271 | 0.01371  | Raly     | 0.762804 | 20.18691 | 0.000609 | Rspo1    | 0.660281  | 10.10585 | 0.033115 | Tms4f4    | -0.40268 | 10.28801 | 0.049652 | Gsch         | 0.740865 | 14.80068 | 0.003933 | Dctn3   | 0.534318 | 12.61349 | 0.020732 |
| Gria2        | -0.10535  | 16.16935 | 0.006213 | Plopg6   | 0.762174 | 16.49962 | 0.002914 | Sgn      | 0.659544  | 9.76977  | 0.037544 | Atpf5f1   | -0.41076 | 12.06235 | 0.023149 | Sertad1      | 0.740387 | 13.84616 | 0.005927 | Bfar    | 0.534322 | 10.72406 | 0.038052 |
| Emb          | -0.105123 | 16.41731 | 0.005526 | Ldhb     | 0.762156 | 12.66476 | 0.014689 | Pz385a   | 0.659502  | 10.96623 | 0.023611 | Selenof   | -0.42111 | 12.98012 | 0.015772 | Hspa1b       | 0.739302 | 10.95992 | 0.020109 | Psmc5   | 0.53325  | 12.66045 | 0.020492 |
| Sdc1         | -0.105189 | 12.60999 | 0.028186 | Btg1     | 0.761382 | 12.59578 | 0.015074 | Cd99     | 0.657258  | 28.85124 | 8.26E-06 | Rpl30     | -0.43378 | 29.71091 | 7.67E-06 | Bok          | 0.739004 | 11.31399 | 0.017631 | Thoc2   | 0.531852 | 10.18739 | 0.045482 |
| Pdh1         | -0.10595  | 13.96616 | 0.01371  | Paics    | 0.761013 | 11.88862 | 0.020382 | Cdc42ep2 | 0.657021  | 9.866091 | 0.03641  | Rpl35     | -0.43814 | 27.26014 | 2.45E-05 | Prrms        | 0.738834 | 47.50041 | 9.54E-10 | Psmb6   | 0.531695 | 15.74143 | 0.007033 |
| Pbld1        | -0.106207 | 15.25272 | 0.034175 | Il34     | 0.760506 | 15.58985 | 0.004327 | Rn45a    | 0.656102  | 33.7497  | 8.15E-07 | Rho2      | -0.45459 | 11.04103 |          |              |          |          |          |         |          |          |          |

|           |          |          |           |            |          |          |          |            |          |          |          |              |          |          |          |         |          |          |          |              |          |          |          |
|-----------|----------|----------|-----------|------------|----------|----------|----------|------------|----------|----------|----------|--------------|----------|----------|----------|---------|----------|----------|----------|--------------|----------|----------|----------|
| Sctr      | -1.45526 | 14.82387 | 0.010186  | MyI6       | 0.702366 | 41.85615 | 2.81E-08 | Ksr1       | 0.584228 | 11.12702 | 0.022416 | Son          | -0.56734 | 18.97758 | 0.001051 | Wars    | 0.686803 | 13.02185 | 0.008478 | Pabpn1       | 0.473437 | 11.11804 | 0.034824 |
| Mx2       | -1.48695 | 34.46268 | 2.25E-06  | Cope       | 0.701286 | 16.07079 | 0.00349  | Ifitm1     | 0.580802 | 12.29214 | 0.013762 | Rps17        | -0.56804 | 29.87512 | 7.23E-06 | Cdk4    | 0.686021 | 22.00357 | 0.000167 | Trpc6        | 0.473213 | 11.531   | 0.030969 |
| Hmgcn3    | -1.5039  | 28.57869 | 3.11E-05  | Sumo1      | 0.698396 | 14.34659 | 0.007083 | Lsm4       | 0.579558 | 9.371881 | 0.043516 | Rps25        | -0.57296 | 33.89236 | 1.00E-06 | Pgk1    | 0.685773 | 19.15069 | 0.000582 | Kans3        | 0.472898 | 10.18125 | 0.045513 |
| Clu       | -1.51483 | 22.12203 | 0.000541  | Psmb4      | 0.697302 | 14.36595 | 0.007295 | Elf4h      | 0.577504 | 9.697739 | 0.038698 | Golima4      | -0.58401 | 10.87122 | 0.038773 | Pdnx3   | 0.685767 | 13.06453 | 0.000836 | Serb1p       | 0.467679 | 11.60247 | 0.030282 |
| Unc3      | -1.51698 | 18.87097 | 0.001879  | Sub1       | 0.695654 | 15.02018 | 0.005556 | Snta1      | 0.575507 | 9.09209  | 0.049382 | Amfid        | -0.58456 | 13.0285  | 0.015449 | Ckr2c   | 0.684668 | 36.48664 | 2.13E-07 | LOC100362110 | 0.466821 | 10.56673 | 0.040353 |
| Sprint2   | -1.6037  | 29.71753 | 1.90E-05  | Tmod3      | 0.691954 | 10.29023 | 0.038004 | Cfl1       | 0.575391 | 20.97082 | 0.000305 | Snrgp        | -0.58697 | 19.00092 | 0.001045 | Cyp7b1  | 0.684173 | 9.87482  | 0.027989 | Oaz1         | 0.463493 | 26.31993 | 0.000106 |
| Slc22a2   | -1.62069 | 17.74909 | 0.003061  | Tpm4       | 0.691778 | 12.52459 | 0.015265 | Pmp22      | 0.574861 | 9.621248 | 0.038931 | Atg5mf       | -0.58942 | 25.79222 | 4.90E-05 | Nrarp   | 0.683581 | 8.61827  | 0.047923 | Rhoa         | 0.462467 | 12.82687 | 0.019451 |
| Ical1     | -1.66644 | 33.1703  | 4.02E-06  | Cd59       | 0.691603 | 11.27102 | 0.026404 | Rpl5       | 0.571348 | 21.25779 | 0.000271 | Tce9l9       | -0.59901 | 14.04333 | 0.000982 | Sfpq    | 0.683179 | 13.64039 | 0.004799 | Sfpq         | 0.461864 | 17.03217 | 0.004457 |
| Scgn      | -1.66889 | 24.90385 | 0.000164  | Cc14       | 0.686577 | 11.29283 | 0.026404 | Lpl        | 0.568387 | 11.33178 | 0.020579 | Trappc6b     | -0.59977 | 13.94607 | 0.010324 | Bfar    | 0.682079 | 12.96616 | 0.008654 | My9          | 0.461562 | 14.07638 | 0.01189  |
| RT1-T24-3 | -1.6759  | 48.37565 | 3.35E-09  | Tmem50a    | 0.685615 | 12.16405 | 0.018096 | Sptbn1     | 0.567636 | 14.30375 | 0.005978 | Atg5f1e      | -0.60361 | 28.06486 | 1.67E-05 | Immt    | 0.680714 | 12.86455 | 0.009067 | PH8          | 0.460833 | 11.62333 | 0.030144 |
| Slc38a5   | -1.68406 | 21.22727 | 0.000803  | Socsl1     | 0.684047 | 14.19085 | 0.007777 | Hes2       | 0.566568 | 10.91514 | 0.023957 | Sparc1       | -0.61001 | 34.09403 | 9.18E-07 | Lam4a   | 0.680687 | 14.60158 | 0.004287 | Mtdh         | 0.4608   | 10.70707 | 0.038106 |
| Pcsk1     | -1.70972 | 16.36237 | 0.005603  | Ubr1       | 0.68399  | 9.729821 | 0.047462 | Gstp1      | 0.565409 | 14.34545 | 0.005901 | Rpl22l1      | -0.61205 | 24.12265 | 0.000101 | Sbno1   | 0.68068  | 13.37098 | 0.007332 | Hmnpa3       | 0.459489 | 16.36201 | 0.005768 |
| Pyy       | -1.73229 | 24.74934 | 0.000173  | KlHdc3     | 0.680962 | 10.0267  | 0.0427   | Ehd2       | 0.565093 | 10.15552 | 0.032381 | Rnf146       | -0.62141 | 14.97055 | 0.006682 | Mrsps34 | 0.677819 | 12.92349 | 0.000881 | Glo1         | 0.450979 | 11.25717 | 0.033245 |
| Snhg11    | -1.80547 | 23.41551 | 0.000317  | Tuba1a     | 0.678356 | 28.81428 | 0.000181 | Tpm4       | 0.564067 | 9.972624 | 0.035133 | Ppic         | -0.62509 | 17.07836 | 0.002523 | Trex1   | 0.677583 | 16.07597 | 0.002224 | Nle1         | 0.450582 | 11.12949 | 0.034824 |
| Chgb      | -1.82321 | 29.38842 | 2.11E-05  | Ndufs2     | 0.677695 | 12.40156 | 0.01625  | Cald1      | 0.563328 | 20.90647 | 0.00031  | Mdm2         | -0.6288  | 14.45491 | 0.000405 | Pde3a   | 0.677118 | 11.98648 | 0.013277 | Las1l        | 0.450581 | 11.12949 | 0.034824 |
| Epcam     | -1.87495 | 29.78985 | 1.90E-05  | Elfk       | 0.674921 | 10.39555 | 0.036677 | Abcc9      | 0.560514 | 9.37479  | 0.043516 | Trnc6a       | -0.63732 | 14.37561 | 0.008725 | Bsg     | 0.677178 | 32.84099 | 1.14E-06 | Sox2ip       | 0.450581 | 11.12948 | 0.034824 |
| Atp1b1    | -1.88857 | 40.74319 | 1.17E-07  | Gstp1      | 0.673754 | 16.57899 | 0.002855 | Fam162a    | 0.55968  | 9.563809 | 0.040827 | Sf3b6        | -0.64102 | 16.42216 | 0.003446 | Arhgdia | 0.675691 | 17.75363 | 0.001051 | Atpsf1d      | 0.450326 | 16.88359 | 0.004725 |
| Mmp3      | -1.89103 | 15.30206 | 0.008818  | Sav1       | 0.673247 | 15.26726 | 0.004989 | Ppp1r14a   | 0.552883 | 13.80429 | 0.007238 | Tceal1       | -0.6421  | 14.58528 | 0.007996 | Dnajc3  | 0.675443 | 11.84737 | 0.014096 | ltgb1        | 0.449163 | 19.64399 | 0.001712 |
| Cte       | -1.90867 | 31.27642 | 1.02E-05  | Elf3d      | 0.673126 | 10.32481 | 0.037633 | Elf4a1     | 0.552757 | 18.11788 | 0.001097 | Anapc13      | -0.64395 | 15.77157 | 0.004627 | Arpc4   | 0.674976 | 17.53627 | 0.001174 | Nrip1        | 0.447398 | 9.984744 | 0.049077 |
| Csp6      | -1.92868 | 21.73799 | 0.000636  | Atpv61f    | 0.670193 | 12.52409 | 0.015265 | Fcgrt      | 0.540014 | 8.937375 | 0.036714 | Rpl41        | -0.64466 | 46.95032 | 2.17E-09 | Ppp2ca  | 0.67495  | 15.75757 | 0.002582 | Tomm20       | 0.442984 | 11.76144 | 0.028755 |
| Scg5      | -1.93396 | 28.0198  | 3.92E-05  | Cdh13      | 0.668504 | 12.85058 | 0.013495 | Ifft       | 0.533187 | 23.92101 | 8.02E-05 | Ost4         | -0.65078 | 18.13579 | 0.001563 | Elovl1  | 0.673997 | 12.63144 | 0.000995 | Fermt2       | 0.438709 | 10.84358 | 0.037313 |
| Isq13     | -2.0576  | 57.03958 | 6.10E-11  | Mmp113a    | 0.664187 | 18.88896 | 0.001093 | Lppm       | 0.53168  | 11.13373 | 0.023385 | Rpl35al1     | -0.65558 | 57.89359 | 1.35E-11 | Cct7    | 0.673785 | 16.57083 | 0.001815 | Sumo1        | 0.436796 | 10.54101 | 0.008683 |
| Ins1      | -2.06412 | 53.85967 | 2.46E-10  | Vim        | 0.636995 | 14.61242 | 0.006628 | Nucb1      | 0.526546 | 10.9906  | 0.023388 | Hes1         | -0.65901 | 14.47233 | 0.003836 | Elf4a1  | 0.672698 | 33.29199 | 0.031407 | Tfcs         | 0.436082 | 11.57975 | 0.030282 |
| Mdn       | -2.09568 | 22.41262 | 0.000507  | Cox5a      | 0.663978 | 15.42798 | 0.004625 | Rnf5       | 0.524456 | 10.81713 | 0.025046 | Kcnq4        | -0.6598  | 15.3522  | 0.005599 | Cmp1    | 0.67232  | 12.13214 | 0.012438 | Kam          | 0.436039 | 16.10038 | 0.006345 |
| Gc        | -2.10216 | 35.959   | 1.10E-06  | Igfbp7     | 0.662343 | 54.27717 | 9.49E-11 | Clic1      | 0.522021 | 9.579397 | 0.040625 | Atg5me       | -0.67731 | 17.49355 | 0.0021   | Psm4    | 0.671923 | 21.50487 | 0.000203 | Hsp90a01     | 0.433676 | 23.75128 | 0.003311 |
| Spp1      | -2.19006 | 27.72201 | 4.44E-05  | Tspan31    | 0.661589 | 10.97839 | 0.029622 | Mdh2       | 0.518828 | 9.345005 | 0.044085 | Uqcrc        | -0.67812 | 22.75699 | 0.000183 | Ace2    | 0.671373 | 9.32168  | 0.03686  | Atpv6C       | 0.433273 | 16.1368  | 0.006324 |
| Ins2      | -2.25842 | 36.2984  | 0.061E-12 | Foxs1      | 0.660686 | 10.69362 | 0.032972 | Ube2m      | 0.516241 | 9.472949 | 0.041882 | Igcam1       | -0.69276 | 26.48557 | 3.49E-05 | Igcam1  | 0.670816 | 10.55758 | 0.032222 | Trappc9      | 0.433292 | 17.3561  | 0.029016 |
| Krt18     | -2.25959 | 37.50081 | 5.22E-07  | Ube2e3     | 0.657812 | 10.00086 | 0.043016 | Cela2a     | 0.514933 | 9.067275 | 0.049493 | Dab2         | -0.70555 | 14.50645 | 0.008257 | Hk1     | 0.669913 | 13.29129 | 0.007576 | Srrm2        | 0.427461 | 12.28737 | 0.023939 |
| Ifi2712b  | -2.26335 | 102.9361 | 1.98E-20  | Txnp1      | 0.65617  | 12.09186 | 0.018689 | Naca       | 0.504077 | 23.70924 | 8.84E-05 | Gatc         | -0.70634 | 22.65144 | 0.000192 | Kif5b   | 0.669828 | 11.85727 | 0.014051 | Dynlrb1      | 0.426606 | 17.60908 | 0.037901 |
| Tmsb15b2  | -2.28225 | 46.80661 | 6.88E-09  | Elf3f      | 0.655852 | 14.53709 | 0.006806 | Rbm3       | 0.494034 | 11.10317 | 0.0225   | Sec62        | -0.70816 | 23.52733 | 0.000132 | Ippp4b  | 0.669458 | 11.47035 | 0.016701 | Mxd3         | 0.425644 | 13.10653 | 0.017435 |
| Citrn     | -2.28581 | 40.09836 | 1.45E-07  | Sf3b2      | 0.655574 | 12.88776 | 0.013417 | Raly       | 0.493775 | 11.66903 | 0.017799 | Gas5         | -0.71186 | 23.42331 | 0.000138 | Lima1   | 0.667908 | 9.550074 | 0.03372  | Lhx57        | 0.425391 | 10.32474 | 0.043987 |
| Pcsk2     | -2.29077 | 40.82825 | 1.17E-07  | Psmb6      | 0.65433  | 12.06736 | 0.018875 | Cdc42      | 0.485609 | 22.24865 | 0.000166 | Cox6c        | -0.71776 | 40.24791 | 5.47E-08 | Ddx39b  | 0.666527 | 15.4185  | 0.002961 | Mterf1       | 0.42457  | 15.58569 | 0.007192 |
| Krt8      | -2.30059 | 33.7919  | 2.79E-06  | RGD1311703 | 0.653776 | 11.35956 | 0.025709 | Eef1a1     | 0.48346  | 25.26011 | 4.45E-05 | Vegf         | -0.71913 | 18.87716 | 0.001101 | Rrm2    | 0.666082 | 12.52667 | 0.010438 | Rrm2         | 0.424435 | 11.10368 | 0.034824 |
| Pty       | -2.40459 | 40.33006 | 1.36E-07  | Rpl5       | 0.652673 | 26.21785 | 3.88E-05 | Sept7      | 0.474816 | 16.17237 | 0.002579 | Rps27f       | -0.72007 | 23.26607 | 0.000146 | Kank1   | 0.665488 | 9.732424 | 0.03154  | Pip4k2c      | 0.424441 | 10.20451 | 0.045423 |
| Ppy       | -2.44074 | 71.6943  | 7.17E-14  | Hsp90ab1   | 0.65031  | 27.9264  | 1.75E-05 | RGD1311739 | 0.469306 | 9.271745 | 0.045505 | Yp1f4        | -0.72174 | 22.56994 | 0.000232 | Psm158  | 0.664858 | 8.667862 | 0.047042 | Pinx1        | 0.420625 | 11.46542 | 0.031494 |
| Scg5      | -2.45727 | 43.17756 | 3.80E-08  | Slc25a3    | 0.646329 | 17.58891 | 0.001845 | Hoxa2      | 0.469306 | 9.271744 | 0.045505 | Crip1        | -0.73788 | 39.08777 | 9.53E-08 | Lamc3   | 0.664699 | 15.6224  | 0.002731 | Gftrh3       | 0.419399 | 11.58387 | 0.030282 |
| Iapp      | -2.49488 | 57.41698 | 5.75E-11  | Plk1g      | 0.645505 | 12.24781 | 0.017414 | Zfp111     | 0.469306 | 9.271742 | 0.045505 | Rpl37a       | -0.74616 | 60.28183 | 4.48E-12 | Mvp     | 0.664254 | 11.15276 | 0.018692 | Elf5a        | 0.416325 | 15.06398 | 0.004858 |
| Chga      | -2.74684 | 53.96728 | 2.46E-10  | Erh        | 0.644831 | 14.55797 | 0.00676  | Eph3       | 0.468769 | 11.1531  | 0.022282 | Hmnc1        | -0.76726 | 14.0281  | 0.010018 | Psm1b   | 0.663411 | 24.7068  | 4.85E-05 | Psm1b        | 0.415451 | 12.89569 | 0.019024 |
| Sst       | -2.77792 | 29.99616 | 1.77E-05  | Tmed9      | 0.642257 | 15.08731 | 0.005437 | Dok4       | 0.468465 | 12.72305 | 0.011642 | Rpl36        | -0.77191 | 64.00592 | 8.43E-13 | Snt3b   | 0.660592 | 12.04634 | 0.012885 | Kp1          | 0.414581 | 11.10812 | 0.034824 |
| Scgb1c1   | -2.82792 | 21.85357 | 0.000611  | Igfbp4     | 0.641779 | 10.81954 | 0.031143 | Ptnp9      | 0.463242 | 12.05245 | 0.015034 | Rps26        | -0.77335 | 64.00896 | 8.43E-13 | Rps26   | 0.659217 | 15.62489 | 0.002731 | H2afv        | 0.414578 | 10.27123 | 0.044283 |
| Resp18    | -2.89113 | 61.67956 | 7.69E-12  | Zdhhc16    | 0.639165 | 10.82595 | 0.031143 | Psmb1      | 0.459138 | 9.941689 | 0.035506 | Rypl3        | -0.77458 | 23.57654 | 0.00013  | Synn    | 0.659038 | 10.62245 | 0.022816 | Tagln2       | 0.409666 | 12.76595 | 0.019738 |
| Reg       | -4.55306 | 237.208  | 1.82E-49  | Elf5a      | 0.634502 | 10.07489 | 0.005447 | Eef1d      | 0.441637 | 9.738948 | 0.03811  | Myf6         | -0.77853 | 52.71293 | 1.50E-10 | Elf3c   | 0.659021 | 17.32838 | 0.001287 | Slc25a4      | 0.407922 | 23.04226 | 0.000427 |
|           |          |          |           | Suc1g1     | 0.626323 | 11.11603 | 0.027974 | Ankrk61    | 0.434908 | 11.66279 | 0.017799 | LOC100905939 | -0.77961 | 21.66235 | 0.000306 | Jagn1   | 0.658914 | 12.38017 | 0.01123  | Psm4a        | 0.407745 | 11.63386 | 0.030144 |
|           |          |          |           | Itm2b      | 0.620491 | 33.69018 | 1.25E-06 | Atg5f1c    | 0.431617 | 9.260854 | 0.0457   | Hoxp         | -0.78417 | 21.0974  | 0.000396 | Atp2b1  | 0.658805 | 14.15258 | 0.0052   |              |          |          |          |

|              |          |          |          |            |          |          |          |          |          |          |          |              |          |          |          |
|--------------|----------|----------|----------|------------|----------|----------|----------|----------|----------|----------|----------|--------------|----------|----------|----------|
| Fubp3        | 0.508706 | 10.90542 | 0.030491 | Scn9a      | -0.34991 | 10.6561  | 0.026595 | Hpse     | 0.62457  | 10.94015 | 0.020212 | Tmsb4x       | 0.305402 | 13.98407 | 0.012217 |
| Eef2         | 0.504665 | 13.63364 | 0.009701 | Shank2     | -0.35015 | 10.42093 | 0.028901 | Ncl      | 0.623069 | 13.64351 | 0.006479 | Erich4       | 0.302524 | 10.62659 | 0.039524 |
| Akr1a1       | 0.496841 | 10.31247 | 0.03779  | Cckar      | -0.35473 | 11.28544 | 0.021003 | Dnpep    | 0.621677 | 11.79004 | 0.014446 | Myf6         | 0.298168 | 19.15252 | 0.001977 |
| Tp11         | 0.494404 | 26.61551 | 3.26E-05 | Gng13      | -0.36668 | 10.31927 | 0.030122 | Yy1      | 0.621598 | 10.33164 | 0.025116 | Map3k6       | 0.284735 | 9.915184 | 0.049998 |
| Prune1       | 0.492491 | 10.44603 | 0.035871 | Cox8a      | -0.36963 | 11.20112 | 0.021781 | Rtp4     | 0.619983 | 9.209803 | 0.038635 | Rab15        | 0.284215 | 10.14391 | 0.0462   |
| Phf2         | 0.49249  | 10.44602 | 0.035871 | Tmsb10     | -0.391   | 15.16512 | 0.004075 | Cope     | 0.619974 | 15.49264 | 0.00289  | Tp53rk       | 0.284213 | 9.918145 | 0.049998 |
| Lyg6         | 0.49249  | 10.44602 | 0.035871 | Rap1gap    | -0.39124 | 10.73183 | 0.026008 | Dctn2    | 0.619325 | 13.85637 | 0.00591  | Mfmr1        | 0.284212 | 9.91814  | 0.049998 |
| Ppp4c        | 0.49249  | 10.44602 | 0.035871 | Ptpn18     | -0.39722 | 13.26702 | 0.009272 | Tnfrs1ap | 0.61917  | 10.9772  | 0.01996  | C6b3         | 0.283052 | 18.42386 | 0.02437  |
| Neu1         | 0.49249  | 10.44602 | 0.035871 | Cd68       | -0.39817 | 10.02108 | 0.034349 | Sra1     | 0.618321 | 13.88069 | 0.005864 | Sept7        | 0.276274 | 10.36147 | 0.043396 |
| Lyrm1        | 0.49249  | 10.44602 | 0.035871 | Tmem37     | -0.40074 | 13.53292 | 0.008156 | Psm1     | 0.616153 | 13.7106  | 0.006289 | Rpl23        | -0.26284 | 15.53496 | 0.007263 |
| Mtpap        | 0.492489 | 10.44601 | 0.035871 | Tmem179    | -0.40101 | 13.21071 | 0.009462 | Mdl1     | 0.614575 | 10.71139 | 0.022016 | Rpl30        | -0.27991 | 15.6604  | 0.007157 |
| Rpl19        | 0.488039 | 33.6335  | 1.27E-06 | Gabb2r2    | -0.41579 | 13.60933 | 0.007877 | Ppil2    | 0.614244 | 11.53494 | 0.016197 | Fau          | -0.28123 | 18.55245 | 0.00241  |
| Zgat         | 0.485093 | 9.988123 | 0.04312  | Aldob      | -0.42841 | 10.85055 | 0.024702 | Pelo     | 0.614072 | 10.55202 | 0.023252 | Tmsb10       | -0.29863 | 20.79513 | 0.001107 |
| Rpsa         | 0.482785 | 18.40368 | 0.001337 | Atox1      | -0.43175 | 9.895199 | 0.036135 | Map1b    | 0.61379  | 10.26127 | 0.025766 | Rpl35        | -0.3065  | 16.29582 | 0.005866 |
| Gbp4         | 0.48155  | 10.00458 | 0.043016 | Krt20      | -0.44188 | 10.94157 | 0.02375  | Ak2      | 0.613539 | 10.13163 | 0.027141 | Ifi27        | -0.3111  | 10.83887 | 0.037313 |
| Cox4i1       | 0.476219 | 21.42791 | 0.000339 | Pm20d2     | -0.44993 | 14.20813 | 0.006146 | Cct6a    | 0.613171 | 10.93447 | 0.020237 | Rps15a       | -0.33456 | 21.5793  | 0.000823 |
| Rplp0        | 0.472862 | 20.85854 | 0.000442 | Vsnl1      | -0.45041 | 10.28225 | 0.030557 | B3gnt2   | 0.612416 | 8.704499 | 0.046454 | Rpl34        | -0.33792 | 18.96479 | 0.002153 |
| Psmb5        | 0.472103 | 11.14501 | 0.027662 | Ttyh3      | -0.45203 | 10.54283 | 0.027708 | Pea15    | 0.612403 | 12.63788 | 0.009983 | Rpl22        | -0.35644 | 15.24384 | 0.000812 |
| Nrxn2        | 0.460034 | 9.642485 | 0.049433 | Mt3        | -0.45203 | 10.54283 | 0.027708 | Psm4a    | 0.611755 | 18.79971 | 0.000689 | Atpsf1e      | -0.3826  | 14.58266 | 0.009918 |
| Cdc42        | 0.459516 | 17.96951 | 0.001595 | Slc16a10   | -0.45401 | 9.067306 | 0.049493 | Art3     | 0.61139  | 12.96129 | 0.008654 | Rps26        | -0.3854  | 22.6105  | 0.000601 |
| Ptms         | 0.4572   | 12.55014 | 0.01526  | Ankrd49    | -0.45401 | 9.067316 | 0.049493 | Klf12    | 0.610733 | 10.51084 | 0.023654 | Rps21        | -0.39659 | 15.45429 | 0.007481 |
| Rps7         | 0.439497 | 17.15235 | 0.00223  | Rps17      | -0.45418 | 10.52809 | 0.027818 | Fbxw2    | 0.610385 | 9.925134 | 0.029233 | Rpl35a1      | -0.41208 | 29.842   | 2.27E-05 |
| Ndufb9       | 0.439234 | 9.915538 | 0.044429 | Ces1f      | -0.45469 | 9.071199 | 0.049493 | Traf4    | 0.609845 | 10.92408 | 0.020276 | Col6a2       | -0.41709 | 10.76221 | 0.002791 |
| Cd99         | 0.425234 | 10.87296 | 0.030763 | Ehf        | -0.45876 | 12.67907 | 0.017113 | Arhgap21 | 0.609714 | 11.64285 | 0.015473 | Gau5         | -0.45348 | 11.57968 | 0.030282 |
| Sparc        | 0.424856 | 17.15331 | 0.00223  | Hist3h2ba  | -0.45939 | 9.68664  | 0.038795 | MGC95208 | 0.609596 | 10.26256 | 0.025766 | Itm2a        | -0.48295 | 13.33409 | 0.01629  |
| Rack1        | 0.423014 | 11.0355  | 0.028925 | Rps12      | -0.46047 | 17.62519 | 0.001378 | Sacrn11  | 0.608735 | 10.47965 | 0.023913 | Rpl36a       | -0.49314 | 26.33166 | 0.000106 |
| Rps4x        | 0.417738 | 21.12304 | 0.000391 | Flar3      | -0.46355 | 9.492957 | 0.041569 | Smarrc4  | 0.608452 | 10.27975 | 0.025621 | Tomm7        | -0.5107  | 14.30909 | 0.01081  |
| Rpl15        | 0.403836 | 17.06597 | 0.002307 | Vsig10     | -0.47875 | 10.12537 | 0.032828 | Shmt2    | 0.606681 | 10.00343 | 0.028728 | Rpl36        | -0.51916 | 42.4886  | 8.62E-08 |
| Rpl8         | 0.367147 | 13.00799 | 0.012764 | Sem1       | -0.48339 | 11.06128 | 0.022811 | Srsf7    | 0.606125 | 11.00434 | 0.019743 | LOC100909539 | -0.52732 | 14.10435 | 0.011848 |
| Tmsb4x       | 0.362377 | 13.20475 | 0.011702 | Fam43a     | -0.48593 | 9.050863 | 0.049779 | Aarsd1   | 0.60577  | 9.309917 | 0.037092 | Rpl37a-ps1   | -0.52824 | 24.16679 | 0.000268 |
| Rps5         | 0.34327  | 10.38647 | 0.036739 | Uqcrb      | -0.48922 | 12.34214 | 0.013502 | Cd44     | 0.605622 | 9.784033 | 0.030946 | Mrc2         | -0.56309 | 10.11506 | 0.046683 |
| Eif1         | 0.334105 | 10.87459 | 0.030763 | Ppp1r1b    | -0.48932 | 13.01974 | 0.10103  | Eif5a    | 0.605483 | 22.83648 | 0.000116 | Rpl37a       | -0.58718 | 49.48232 | 3.03E-09 |
| Rpl29        | 0.312593 | 10.37381 | 0.036739 | Mettl14    | -0.4986  | 10.49441 | 0.02805  | Cnbp     | 0.603057 | 19.71767 | 0.00045  | Rpl41        | -0.60963 | 55.48377 | 2.34E-10 |
| F7           | -0.37998 | 12.03228 | 0.019131 | Rplp1      | -0.52117 | 23.62947 | 9.09E-05 | Pdrg1    | 0.602674 | 10.59966 | 0.022978 | Kazal1       | -0.6242  | 11.80385 | 0.02833  |
| Rplp1        | -0.39809 | 14.0584  | 0.008208 | Cox5b      | -0.52272 | 14.22927 | 0.006097 | Hdgf2    | 0.602492 | 10.29366 | 0.02547  | Rps28        | -0.74411 | 51.38179 | 1.32E-09 |
| Rspo3        | -0.3989  | 11.033   | 0.028925 | Atp5mc2    | -0.52396 | 12.73343 | 0.011609 | Rragc    | 0.602206 | 9.827248 | 0.0304   | Rps27        | -0.7612  | 77.73574 | 4.76E-15 |
| Rps7         | -0.45107 | 17.65981 | 0.00181  | Rpl30      | -0.52532 | 22.752   | 0.000135 | Zc3h15   | 0.602153 | 10.58572 | 0.023071 | Ifi272b      | -0.77198 | 16.32854 | 0.005818 |
| Rps15a       | -0.47607 | 21.83772 | 0.000281 | Gng5       | -0.52651 | 15.45771 | 0.00359  | Cchcr1   | 0.601606 | 11.34878 | 0.017476 | Rps29        | -0.77644 | 91.41388 | 1.41E-17 |
| Elob         | -0.52584 | 15.74661 | 0.004022 | Carml1     | -0.52722 | 12.96269 | 0.0105   | Rbpms    | 0.600498 | 10.20132 | 0.026345 | Prrs1        | -0.77812 | 15.42015 | 0.007563 |
| Tmsb10       | -0.53322 | 35.98149 | 4.38E-07 | Ppat       | -0.52743 | 10.54859 | 0.027708 | Stoml2   | 0.6004   | 10.30393 | 0.02537  | Plac9        | -0.77988 | 21.22364 | 0.000953 |
| Ndufs5       | -0.53413 | 12.19383 | 0.017867 | Epb41i3    | -0.53052 | 17.76392 | 0.001286 | H2afy    | 0.599838 | 10.75973 | 0.021718 | Cips         | -0.78829 | 15.52413 | 0.007263 |
| Atox1        | -0.54435 | 14.19052 | 0.007777 | Lyplal1    | -0.53134 | 10.63527 | 0.026842 | H2afy    | 0.599749 | 10.92538 | 0.020276 | Amy2a3       | -1.02293 | 20.17314 | 0.00143  |
| Rpl34        | -0.57035 | 30.56865 | 5.27E-06 | Igfs5      | -0.53432 | 17.92396 | 0.001204 | Sptan1   | 0.599549 | 10.26029 | 0.025766 | Cfb          | -1.07646 | 11.38383 | 0.0322   |
| Ddx3         | -0.59107 | 17.69651 | 0.001786 | Ces1       | -0.53557 | 9.473366 | 0.041882 | Birc5    | 0.599141 | 10.53965 | 0.023347 |              |          |          |          |
| Diaph3       | -0.60534 | 9.674767 | 0.048683 | Fam160b2   | -0.54111 | 10.82663 | 0.02497  | Vdac2    | 0.598892 | 21.1461  | 0.00024  |              |          |          |          |
| Polg         | -0.60599 | 14.21051 | 0.007759 | Rps15a     | -0.55502 | 27.91628 | 1.29E-05 | Sptlc2   | 0.598599 | 10.58902 | 0.02307  |              |          |          |          |
| Serf2        | -0.61836 | 29.87225 | 7.23E-06 | Ntrk1      | -0.56169 | 13.08024 | 0.010058 | Rnf26    | 0.598469 | 10.72938 | 0.02188  |              |          |          |          |
| Myf6l        | -0.65181 | 18.45159 | 0.00132  | Ncor1      | -0.57015 | 9.435259 | 0.042535 | Nuoc     | 0.597765 | 17.87269 | 0.001002 |              |          |          |          |
| Rpl35a1      | -0.65805 | 34.69998 | 8.15E-07 | RGD1560394 | -0.5702  | 10.18575 | 0.031952 | Hnrnpa3  | 0.596548 | 26.11588 | 2.56E-05 |              |          |          |          |
| Rps27l       | -0.69252 | 14.01683 | 0.008358 | Rps25      | -0.57147 | 22.54459 | 0.000147 | Ubl4a    | 0.596138 | 8.855157 | 0.04382  |              |          |          |          |
| Atp5md       | -0.71249 | 11.84233 | 0.020699 | Dnph1      | -0.57233 | 9.603314 | 0.04017  | Eif3d    | 0.595986 | 12.32515 | 0.011438 |              |          |          |          |
| Atp5mf       | -0.71775 | 18.34164 | 0.001354 | Mrip52     | -0.5732  | 11.58095 | 0.018472 | Oaz1     | 0.594527 | 35.69244 | 2.98E-07 |              |          |          |          |
| Nduif5       | -0.72041 | 15.18071 | 0.005198 | Rpl27      | -0.58063 | 20.16535 | 0.000435 | Tevrd1   | 0.594497 | 10.31838 | 0.025214 |              |          |          |          |
| Cox6c        | -0.74218 | 25.21749 | 5.80E-05 | Ppp2r2b    | -0.58075 | 13.63435 | 0.007796 | Arid5b   | 0.594313 | 9.447919 | 0.035141 |              |          |          |          |
| Uqcrc        | -0.75863 | 15.79644 | 0.003956 | Pls1       | -0.58702 | 11.10343 | 0.0225   | Chmp6    | 0.594056 | 9.986879 | 0.028805 |              |          |          |          |
| Atp5f1e      | -0.76036 | 26.30417 | 3.79E-05 | Clasp2     | -0.59229 | 9.043105 | 0.049911 | Tubb2a   | 0.59403  | 9.295122 | 0.037341 |              |          |          |          |
| Rps26        | -0.78515 | 39.07493 | 1.06E-07 | Cmb1       | -0.59367 | 8.801229 | 0.037168 | Smarrc21 | 0.593817 | 9.609061 | 0.033038 |              |          |          |          |
| Cox7c        | -0.79481 | 18.34086 | 0.001354 | Ndufs6     | -0.59413 | 14.74851 | 0.004977 | Raly     | 0.593515 | 17.93402 | 0.000981 |              |          |          |          |
| Crip1        | -0.81896 | 33.35985 | 1.37E-06 | Snrpe      | -0.59576 | 16.3741  | 0.002357 | Sar1b    | 0.5931   | 11.04365 | 0.019548 |              |          |          |          |
| Uap1         | -0.8439  | 10.8672  | 0.030763 | Ubl5       | -0.59677 | 11.82582 | 0.016532 | Banf1    | 0.592977 | 9.776147 | 0.031032 |              |          |          |          |
| Uqcrc10      | -0.86154 | 28.79057 | 1.20E-05 | Tpd52      | -0.59788 | 10.72292 | 0.026025 | C1s      | 0.592761 | 8.710036 | 0.046438 |              |          |          |          |
| Tnxa-ps1     | -0.8786  | 14.79669 | 0.006171 | Cdk5       | -0.59898 | 10.4893  | 0.028068 | Rela     | 0.591771 | 9.793291 | 0.030837 |              |          |          |          |
| Snrpg        | -0.88273 | 26.25806 | 3.84E-05 | Atp5mg     | -0.59913 | 24.77644 | 5.52E-05 | Uf1      | 0.591    | 9.378731 | 0.036028 |              |          |          |          |
| Rpl36a       | -0.88648 | 34.79165 | 7.92E-07 | Dnajc12    | -0.60016 | 10.51776 | 0.027862 | Nuf2     | 0.590986 | 12.18332 | 0.012197 |              |          |          |          |
| S100a6       | -0.89598 | 22.46493 | 0.000209 | Ap2a1      | -0.60032 | 9.518723 | 0.041129 | Arpc1b   | 0.59075  | 14.51957 | 0.004453 |              |          |          |          |
| LOC100909539 | -0.90757 | 16.31623 | 0.003145 | Synj1      | -0.6017  | 10.24282 | 0.031074 | Ddx50    | 0.590021 | 9.663607 | 0.032396 |              |          |          |          |
| Tomm7        | -0.91163 | 19.16156 | 0.000954 | Cox6b1     | -0.60407 | 19.90415 | 0.000489 | Ogfr     | 0.58949  | 8.771647 | 0.045586 |              |          |          |          |
| Abca8a       | -0.92832 | 16.22369 | 0.003285 | Anxa13     | -0.60425 | 13.70053 | 0.007571 | Sh2b3    | 0.588929 | 9.907672 | 0.029469 |              |          |          |          |
| Dcn          | -0.93732 | 11.78717 | 0.021147 | RGD1309350 | -0.60577 | 12.68741 | 0.01712  | Map3k12  | 0.588314 | 10.74003 | 0.021833 |              |          |          |          |
| Rpl37a       | -0.98857 | 78.23692 | 1.05E-15 |            |          |          |          |          |          |          |          |              |          |          |          |

|              |          |          |          |            |          |          |          |
|--------------|----------|----------|----------|------------|----------|----------|----------|
| Nop10        | -0.65478 | 13.05764 | 0.010151 | Gpi        | 0.580446 | 11.24869 | 0.018083 |
| Scn3b        | -0.65755 | 9.444701 | 0.0424   | Rpia       | 0.579311 | 9.316612 | 0.037009 |
| Wdr47        | -0.65973 | 18.27728 | 0.00103  | Hmmr       | 0.579308 | 12.11497 | 0.012526 |
| Gas5         | -0.65977 | 13.65482 | 0.007734 | Eif2b2     | 0.57849  | 9.452161 | 0.03511  |
| Fgfr3        | -0.65989 | 12.96607 | 0.0105   | Txndc15    | 0.578134 | 10.15758 | 0.026922 |
| Get4         | -0.66156 | 12.10973 | 0.014651 | Rnpep      | 0.577524 | 9.06599  | 0.040626 |
| Atp2c1       | -0.66202 | 9.550024 | 0.040827 | Nsun2      | 0.577337 | 9.176046 | 0.039183 |
| Plac9        | -0.66288 | 11.34845 | 0.020442 | Rhoc       | 0.577219 | 17.0889  | 0.001424 |
| Slc34a2      | -0.66963 | 12.21578 | 0.01416  | Tpm4       | 0.57648  | 15.32221 | 0.003098 |
| Sec61b       | -0.67059 | 20.22977 | 0.000423 | Ahsa1      | 0.575908 | 9.217529 | 0.038526 |
| Cox7a2       | -0.6706  | 24.56056 | 6.04E-05 | Aldh7a1    | 0.575288 | 9.503761 | 0.034283 |
| Rpl22        | -0.67341 | 27.48521 | 1.60E-05 | Grpel1     | 0.575248 | 11.4005  | 0.017236 |
| Elob         | -0.67376 | 30.32021 | 4.17E-06 | Birc6      | 0.574677 | 9.031897 | 0.04105  |
| Son          | -0.67377 | 17.32869 | 0.001556 | LOC690617  | 0.57442  | 10.49915 | 0.02373  |
| Zmiz1        | -0.67528 | 10.3733  | 0.029426 | Arfrp1     | 0.57421  | 8.766746 | 0.045635 |
| Lgals2       | -0.67572 | 13.26495 | 0.009272 | Nfkbi      | 0.574201 | 9.656613 | 0.032396 |
| Micos10      | -0.67772 | 16.35819 | 0.002366 | Galnt2     | 0.573772 | 9.421462 | 0.035499 |
| Pdzk1ip1     | -0.67802 | 11.57323 | 0.018494 | Dbn1       | 0.573753 | 8.533506 | 0.049349 |
| Ctsb         | -0.68014 | 14.19333 | 0.006175 | Ptpn11     | 0.573306 | 8.651737 | 0.047283 |
| Balap3       | -0.6838  | 11.09957 | 0.0225   | Cdc42se1   | 0.572844 | 9.986601 | 0.041913 |
| Silr         | -0.68402 | 13.7914  | 0.007257 | Ppp1ca     | 0.572631 | 14.60184 | 0.004287 |
| F7           | -0.6856  | 15.92439 | 0.002857 | Rpp30      | 0.572505 | 9.859052 | 0.030027 |
| Tcea9        | -0.689   | 11.93175 | 0.015807 | Grpel2     | 0.571722 | 12.49416 | 0.010588 |
| Scd2         | -0.68989 | 11.21228 | 0.021699 | Psmid14    | 0.571489 | 9.226716 | 0.038386 |
| Mmp9         | -0.692   | 19.55608 | 0.000578 | Nap1l1     | 0.571171 | 13.70324 | 0.006298 |
| Serp1        | -0.69372 | 12.42559 | 0.013047 | Rhoq       | 0.570804 | 9.54536  | 0.033758 |
| Sec24d       | -0.6947  | 12.15956 | 0.014372 | Pin1       | 0.570385 | 10.94281 | 0.020212 |
| Ndufb4       | -0.69691 | 23.36569 | 0.000102 | Psmid2     | 0.569971 | 9.847326 | 0.030173 |
| Rpl22l1      | -0.69785 | 20.75798 | 0.000333 | RGD1563365 | 0.569236 | 9.93984  | 0.029138 |
| Ndufa8       | -0.70115 | 10.55789 | 0.02765  | Rfc2       | 0.568996 | 9.45222  | 0.03511  |
| Esrp1        | -0.70573 | 15.40016 | 0.003672 | Sic1a3     | 0.568667 | 14.0296  | 0.005503 |
| Cd164        | -0.70735 | 13.89987 | 0.006997 | Decr1      | 0.567905 | 8.717013 | 0.046438 |
| Rpl36al      | -0.70744 | 23.65724 | 9.02E-05 | Rala       | 0.566796 | 8.978672 | 0.04204  |
| Serf2        | -0.70814 | 38.74366 | 8.29E-08 | Knstrn     | 0.566578 | 9.381057 | 0.036028 |
| Timm8b       | -0.71136 | 16.48466 | 0.002249 | Igfbp4     | 0.566211 | 11.02613 | 0.019585 |
| Mpp6         | -0.72249 | 11.42547 | 0.019747 | Ufc1       | 0.565807 | 12.33892 | 0.011404 |
| Rnf208       | -0.72405 | 14.60782 | 0.005268 | Ppp1r37    | 0.565791 | 8.699917 | 0.046454 |
| Alg2         | -0.72433 | 11.8719  | 0.016206 | Fnta       | 0.56539  | 9.645082 | 0.032539 |
| Pgm5         | -0.72473 | 10.31581 | 0.030122 | Ripk2      | 0.565327 | 10.69462 | 0.022168 |
| Rpl31        | -0.72878 | 28.54193 | 9.60E-06 | Aida       | 0.565321 | 8.700338 | 0.046454 |
| Cdh1         | -0.73266 | 9.610541 | 0.040082 | Hipk1      | 0.564357 | 8.997142 | 0.041782 |
| Ppp2r2d      | -0.73797 | 13.802   | 0.007238 | Ebag9      | 0.563945 | 9.090518 | 0.040573 |
| Ddah1        | -0.7389  | 17.39292 | 0.001511 | Fbxo27     | 0.563567 | 9.086138 | 0.040573 |
| Ndrg4        | -0.74055 | 19.52606 | 0.000584 | Glrx5      | 0.563213 | 11.35461 | 0.017456 |
| Emb          | -0.74433 | 9.721561 | 0.03831  | Furin      | 0.562705 | 8.525329 | 0.04951  |
| Gnas         | -0.74711 | 22.34665 | 0.000161 | Oaz2       | 0.561843 | 9.976444 | 0.028833 |
| Epm2aip1     | -0.74943 | 12.69846 | 0.011712 | Nsmce2     | 0.561507 | 8.96482  | 0.042248 |
| Ucp2         | -0.75293 | 9.856075 | 0.03645  | Cltc       | 0.560421 | 9.929749 | 0.029233 |
| Golga4       | -0.75525 | 12.48289 | 0.012719 | Cacna1c    | 0.559946 | 9.971642 | 0.028863 |
| Afdn         | -0.75737 | 14.77956 | 0.004912 | Gmpr       | 0.55987  | 9.361904 | 0.036258 |
| Ap3s1        | -0.75753 | 12.99714 | 0.010367 | Triobp     | 0.558975 | 8.737903 | 0.046193 |
| Ivns1labp    | -0.75799 | 13.34983 | 0.000894 | Dust11     | 0.557865 | 10.56335 | 0.023222 |
| Lrp11        | -0.76033 | 10.96587 | 0.023611 | Abcg3l4    | 0.557844 | 9.98369  | 0.02881  |
| Nig2         | -0.76657 | 11.0578  | 0.022811 | Ndufv2     | 0.557786 | 12.65092 | 0.009962 |
| Fos          | -0.77255 | 11.57975 | 0.018472 | Mrps35     | 0.557084 | 9.551391 | 0.03372  |
| Tes          | -0.77366 | 11.10613 | 0.0225   | Smyd2      | 0.557084 | 9.87667  | 0.029789 |
| Dynl12       | -0.77767 | 14.13583 | 0.006287 | Pnn        | 0.557061 | 11.60829 | 0.015731 |
| Fosb         | -0.77827 | 10.56216 | 0.027642 | Psmb3      | 0.556868 | 17.78855 | 0.001036 |
| Stmn3        | -0.79149 | 14.48927 | 0.005536 | Psmb7      | 0.556607 | 8.764731 | 0.045635 |
| Pcbd1        | -0.80194 | 11.88348 | 0.016144 | Crim1      | 0.556287 | 9.364278 | 0.036258 |
| Ndrg1        | -0.80299 | 11.66187 | 0.017799 | Grn        | 0.556016 | 9.586269 | 0.033352 |
| Cox7b        | -0.80467 | 25.45504 | 4.06E-05 | Mrpl38     | 0.555694 | 11.16986 | 0.018578 |
| Hnflb        | -0.80893 | 16.8839  | 0.001903 | Mettl23    | 0.555593 | 10.5766  | 0.023145 |
| Tmem123      | -0.81013 | 10.2644  | 0.030795 | Prkar2b    | 0.554927 | 11.02207 | 0.019592 |
| S100a11      | -0.81134 | 17.7981  | 0.001269 | Lman1      | 0.554318 | 10.39301 | 0.024784 |
| Angptl1      | -0.81477 | 15.39749 | 0.003672 | Bpnt1      | 0.553372 | 8.50585  | 0.049922 |
| Klf6         | -0.81854 | 11.52613 | 0.018924 | Ppp4r3b    | 0.553234 | 8.62733  | 0.047802 |
| Chuc1        | -0.81877 | 18.72445 | 0.000839 | Poi2m      | 0.551465 | 11.20314 | 0.018387 |
| Spint2       | -0.82273 | 9.07256  | 0.049493 | Cd59       | 0.551317 | 11.07154 | 0.019292 |
| Rpl35al1     | -0.82674 | 57.76202 | 8.97E-12 | Mxd3       | 0.550786 | 14.53098 | 0.004438 |
| Pclo         | -0.83338 | 10.02633 | 0.034325 | Acbd6      | 0.550632 | 8.665606 | 0.047042 |
| Robo2        | -0.84259 | 15.4895  | 0.003543 | Prxl2a     | 0.549892 | 9.979603 | 0.028828 |
| Mrps21       | -0.85116 | 23.13675 | 0.000113 | Csk        | 0.549812 | 9.067746 | 0.040626 |
| Ptprf        | -0.85662 | 12.68666 | 0.011712 | Stip1      | 0.549395 | 8.875711 | 0.043704 |
| Tspan7       | -0.861   | 13.86477 | 0.007084 | Dnaj1      | 0.548907 | 11.92468 | 0.013667 |
| Sec62        | -0.86388 | 24.36322 | 6.50E-05 | Fkbp8      | 0.547333 | 10.53817 | 0.023347 |
| Rab25        | -0.87783 | 14.45677 | 0.005599 | Stub1      | 0.547044 | 10.61483 | 0.02287  |
| Kif12        | -0.87825 | 12.75379 | 0.011547 | Naca       | 0.545191 | 42.86658 | 8.84E-09 |
| Tmem206      | -0.88072 | 10.38589 | 0.029283 | Got1       | 0.544864 | 8.55626  | 0.048849 |
| Rpl34        | -0.89001 | 65.87052 | 2.28E-13 | Srprb      | 0.544694 | 9.253364 | 0.038042 |
| Ufsp2        | -0.89944 | 20.11938 | 0.000444 | Erf3       | 0.542403 | 8.908459 | 0.043286 |
| Sox9         | -0.90254 | 11.36092 | 0.020351 | Ldb3       | 0.540735 | 9.380993 | 0.036028 |
| Gat2         | -0.90339 | 16.08322 | 0.002685 | Rps6la4    | 0.540052 | 8.717171 | 0.046438 |
| LOC100909539 | -0.91261 | 19.00721 | 0.000741 | Bin1       | 0.540043 | 8.709747 | 0.046438 |
| Tmem256      | -0.9127  | 24.35119 | 6.50E-05 | Psmid8     | 0.539862 | 8.575746 | 0.048496 |
| Cartpt       | -0.91449 | 11.14532 | 0.022295 | Rnps1      | 0.538943 | 9.754323 | 0.031308 |
| Tmem130      | -0.91646 | 13.87283 | 0.007077 | Eif1b      | 0.538508 | 9.226836 | 0.038386 |
| Rps27l       | -0.92131 | 28.90793 | 8.09E-06 | Slamf8     | 0.538074 | 11.171   | 0.018578 |
| Hmgcs1       | -0.92355 | 12.87757 | 0.010928 | Ensa       | 0.538052 | 8.933176 | 0.042816 |

|            |          |          |          |           |          |          |          |
|------------|----------|----------|----------|-----------|----------|----------|----------|
| Naa38      | -0.92504 | 27.97648 | 1.26E-05 | Cd99      | 0.53722  | 24.51943 | 5.24E-05 |
| Ndufa2     | -0.92789 | 32.87427 | 1.20E-06 | Ddrgk1    | 0.536743 | 10.95196 | 0.020158 |
| Pgm1       | -0.94165 | 17.0443  | 0.001763 | Ndufa9    | 0.536727 | 9.044901 | 0.040857 |
| Ndufa5     | -0.94547 | 34.15238 | 6.85E-07 | RT1-T24-4 | 0.536668 | 8.945665 | 0.04258  |
| Ost4       | -0.95836 | 23.29547 | 0.000105 | Pdia6     | 0.536011 | 12.34003 | 0.011404 |
| Ica1       | -0.95934 | 11.03206 | 0.002308 | Csnk1a1   | 0.535841 | 9.398887 | 0.035786 |
| Mtin       | -0.95938 | 25.24692 | 4.45E-05 | Rn2b8     | 0.535134 | 20.2514  | 0.000355 |
| Insr       | -0.97517 | 21.15843 | 0.000283 | Uqcrl1    | 0.535128 | 10.15029 | 0.026954 |
| Acly       | -0.98277 | 15.23747 | 0.003935 | Ccdc25    | 0.534223 | 8.713731 | 0.046438 |
| Rflnb      | -0.9927  | 10.72556 | 0.026025 | Eif3b     | 0.534063 | 8.607895 | 0.048016 |
| Hmg3       | -0.99292 | 17.40216 | 0.00151  | Gmpr2     | 0.53312  | 8.572281 | 0.048496 |
| Alcam      | -0.99331 | 18.27126 | 0.00103  | Las1      | 0.532477 | 12.21929 | 0.012    |
| S100a6     | -1.00466 | 22.85398 | 0.000129 | Il6st     | 0.53175  | 9.171684 | 0.039183 |
| Peg3       | -1.00956 | 16.73561 | 0.002041 | Akr1a1    | 0.531297 | 18.10958 | 0.000914 |
| C1qtnf6    | -1.01966 | 12.62447 | 0.011979 | Ubac1     | 0.530142 | 8.576497 | 0.048496 |
| Cryaa      | -1.02009 | 18.20835 | 0.001055 | Dnaja3    | 0.530142 | 8.576495 | 0.048496 |
| Ramp3      | -1.03271 | 12.76972 | 0.011481 | Ndufa12   | 0.529862 | 11.69645 | 0.015128 |
| Neurod1    | -1.04151 | 13.19587 | 0.00951  | Fus       | 0.527193 | 9.681223 | 0.032238 |
| Smim22     | -1.04677 | 18.50016 | 0.00093  | Arid5a    | 0.527049 | 8.576724 | 0.048496 |
| Eps8l2     | -1.05431 | 32.36726 | 1.52E-06 | Cd63      | 0.52688  | 43.04902 | 8.19E-09 |
| Ndufa4     | -1.07928 | 29.64814 | 5.67E-06 | Foxk2     | 0.526788 | 11.89512 | 0.013819 |
| Uqcrc2     | -1.08198 | 31.81729 | 1.98E-06 | Prox1     | 0.526629 | 8.969012 | 0.042207 |
| Cow6c      | -1.08537 | 68.22031 | 7.21E-14 | Hsp90b1   | 0.526437 | 13.43375 | 0.007118 |
| Scgn       | -1.10754 | 11.09407 | 0.022517 | Akr1b1    | 0.526139 | 8.94872  | 0.042565 |
| Lefty2     | -1.10989 | 17.15108 | 0.001688 | Sl13      | 0.525162 | 9.589982 | 0.033334 |
| Atp5mf     | -1.1291  | 59.44164 | 4.26E-12 | Serb1p    | 0.523632 | 12.25727 | 0.01181  |
| Ddx3       | -1.13054 | 46.17639 | 2.46E-09 | Nduf62    | 0.522324 | 10.84863 | 0.020926 |
| Tm4sf4     | -1.13687 | 24.39835 | 6.44E-05 | Rabac1    | 0.521194 | 14.05258 | 0.005465 |
| Cldn3      | -1.14539 | 16.49303 | 0.002249 | Tyw1      | 0.518519 | 9.171436 | 0.039183 |
| Gja1       | -1.14699 | 21.00593 | 0.000301 | Sgsm2     | 0.518232 | 11.43798 | 0.01696  |
| Ndufb2     | -1.14807 | 49.45523 | 5.22E-10 | Blrc3     | 0.518155 | 10.47736 | 0.023913 |
| Pcsk2      | -1.15661 | 9.791547 | 0.037168 | Reep5     | 0.517539 | 11.306   | 0.017672 |
| Clu        | -1.16449 | 14.6336  | 0.005236 | Lmn1      | 0.515503 | 8.59637  | 0.048261 |
| Snprg      | -1.16493 | 55.74926 | 2.32E-11 | Cdh13     | 0.515107 | 8.815522 | 0.044667 |
| Uqcrc      | -1.17036 | 45.20796 | 3.74E-09 | Rnf187    | 0.514718 | 8.812756 | 0.044678 |
| Anapc13    | -1.17696 | 33.66858 | 8.40E-07 | Tle5      | 0.513813 | 12.81532 | 0.009247 |
| Cop9       | -1.18558 | 35.22848 | 4.28E-07 | Cdip1     | 0.511918 | 8.927882 | 0.042884 |
| Atp1b1     | -1.20211 | 20.30606 | 0.000414 | Gli1      | 0.510478 | 10.32838 | 0.025119 |
| Scg3       | -1.20232 | 11.01004 | 0.023305 | Rab5c     | 0.510468 | 11.31843 | 0.01763  |
| Onecut1    | -1.20438 | 17.89024 | 0.001214 | Mrpl17    | 0.510402 | 11.86342 | 0.014034 |
| Snhg11     | -1.20641 | 11.06482 | 0.022811 | Tal1      | 0.508934 | 10.09483 | 0.027599 |
| Gria2      | -1.21058 | 32.56823 | 1.39E-06 | Fkbp1a    | 0.50884  | 11.91628 | 0.013699 |
| Ucn3       | -1.22444 | 12.82076 | 0.011233 | Bcat1     | 0.508794 | 8.77133  | 0.045586 |
| Ifi2712b   | -1.23681 | 32.87666 | 1.20E-06 | Rhoa      | 0.508564 | 11.37919 | 0.0174   |
| Uqcrl10    | -1.23832 | 74.79398 | 3.43E-15 | Pim1      | 0.507802 | 11.37104 | 0.017412 |
| Alb        | -1.24294 | 12.44194 | 0.012967 | Psmb4     | 0.505384 | 12.05364 | 0.012862 |
| Rpl36a     | -1.25671 | 86.4417  | 1.22E-17 | Ssb       | 0.505071 | 8.73857  | 0.046193 |
| Chga       | -1.26183 | 11.46804 | 0.019389 | Cenpm     | 0.504956 | 8.887896 | 0.043661 |
| Eif2s3y    | -1.26857 | 54.54509 | 4.08E-11 | Commf3    | 0.504566 | 8.624129 | 0.047826 |
| Col27a1    | -1.27458 | 29.94391 | 5.01E-06 | Ndufb10   | 0.503065 | 12.10295 | 0.01258  |
| lyz2       | -1.28003 | 10.48583 | 0.028068 | Cep104    | 0.50209  | 11.15134 | 0.018692 |
| Cdt4       | -1.28314 | 25.71494 | 3.63E-05 | Mpr15     | 0.501655 | 8.858113 | 0.043806 |
| Cst6       | -1.28567 | 15.39499 | 0.003672 | Ppia      | 0.500408 | 31.65724 | 1.89E-06 |
| Ccdc2      | -1.28647 | 16.6879  | 0.002085 | C1r       | 0.499624 | 8.571903 | 0.048496 |
| Lcn2       | -1.29588 | 22.59936 | 0.000144 | Cycs      | 0.499619 | 10.74934 | 0.021762 |
| Atp5f1e    | -1.34252 | 98.22127 | 3.40E-20 | Ilk       | 0.498656 | 8.827382 | 0.044435 |
| Cpe        | -1.34669 | 12.73541 | 0.011609 | Ube2e3    | 0.497441 | 8.673094 | 0.047025 |
| Cox17      | -1.35411 | 45.8125  | 2.85E-09 | Rras      | 0.497326 | 9.559138 | 0.033701 |
| Epcam      | -1.36238 | 19.28837 | 0.000649 | Rrm2      | 0.497129 | 13.02709 | 0.008474 |
| Cox7c      | -1.36648 | 70.51459 | 2.57E-14 | Cops6     | 0.497025 | 9.161803 | 0.039282 |
| Pcsk1      | -1.3727  | 12.10516 | 0.014651 | Cox4i1    | 0.49656  | 33.52245 | 8.44E-07 |
| Rps26      | -1.37478 | 133.2689 | 9.34E-28 | Eif1      | 0.496062 | 33.90576 | 7.00E-07 |
| Sctr       | -1.4111  | 16.4499  | 0.002279 | Slc25a4   | 0.495544 | 26.07985 | 2.59E-05 |
| Atp5me     | -1.44506 | 60.29696 | 2.84E-12 | Nme1      | 0.494831 | 8.584053 | 0.048496 |
| Scg5       | -1.44726 | 12.2227  | 0.01416  | Erh       | 0.494644 | 13.60306 | 0.006576 |
| Krt18      | -1.46224 | 17.11644 | 0.001712 | Pebp1     | 0.494385 | 15.87382 | 0.002443 |
| Resp18     | -1.49307 | 14.27686 | 0.005986 | Calr      | 0.493584 | 16.09814 | 0.002205 |
| MGC105649  | -1.4973  | 11.49716 | 0.019176 | Gsp1      | 0.493314 | 13.17541 | 0.007923 |
| Rpl36      | -1.5044  | 162.0959 | 5.83E-34 | Pde4dip   | 0.493036 | 9.405469 | 0.035708 |
| Rpl37a     | -1.512   | 197.3236 | 3.16E-41 | Psmb2     | 0.492427 | 10.41803 | 0.024536 |
| Tomm7      | -1.55015 | 65.77227 | 2.30E-13 | Rpa1      | 0.488381 | 9.509852 | 0.034232 |
| Rpl41      | -1.56211 | 180.7634 | 6.51E-38 | Cct5      | 0.488132 | 10.07108 | 0.027869 |
| Iapp       | -1.56853 | 19.40702 | 0.000612 | Abtb2     | 0.487792 | 12.28777 | 0.011644 |
| Tf         | -1.59531 | 16.44515 | 0.002279 | Ndufb9    | 0.487483 | 16.93967 | 0.00153  |
| Slc2a2     | -1.59768 | 20.24049 | 0.000423 | Tmem106a  | 0.486457 | 16.30037 | 0.002033 |
| Atp5md     | -1.59771 | 79.32698 | 4.15E-16 | Gtf2f     | 0.485585 | 9.577707 | 0.033459 |
| Scg2       | -1.67803 | 20.95781 | 0.000305 | Etv4      | 0.485574 | 9.274096 | 0.037719 |
| Pyy        | -1.67865 | 25.10975 | 4.71E-05 | Ptx3      | 0.484642 | 8.614606 | 0.047958 |
| Sec61g     | -1.69126 | 72.51188 | 1.03E-14 | Pdia3     | 0.479479 | 11.12272 | 0.018911 |
| Rps27      | -1.72109 | 190.5354 | 5.75E-40 | Gnas      | 0.47864  | 11.60365 | 0.015738 |
| Rps21      | -1.77653 | 150.3284 | 1.93E-31 | Ubb       | 0.478567 | 42.45665 | 1.08E-08 |
| Krt18      | -1.80051 | 29.85001 | 5.21E-06 | Sh3bgr13  | 0.478096 | 9.412411 | 0.035624 |
| Tmem15b2   | -1.89658 | 33.15084 | 1.06E-06 | Lman2     | 0.477865 | 8.720586 | 0.046438 |
| Mmp3       | -1.94119 | 24.59522 | 5.98E-05 | Ska1      | 0.476679 | 12.99996 | 0.008557 |
| Rpl37a-ps1 | -1.95289 | 193.1807 | 1.90E-40 | Nyl12a    | 0.475352 | 17.44753 | 0.001222 |
| Grg        | -2.0705  | 46.1933  | 2.46E-09 | Mtch1     | 0.474298 | 9.895337 | 0.029622 |
| Rps29      | -2.07208 | 330.6009 | 4.21E-70 | Dstn      | 0.473696 | 10.34889 | 0.025007 |
| Rps28      | -2.11427 | 177.7195 | 2.58E-37 | Psm3a1    | 0.472914 | 10.62929 | 0.022772 |
| Spp1       | -2.13378 | 34.44214 | 6.11E-07 | Map1lc3a  | 0.472767 | 14.35675 | 0.004815 |

|         |          |          |          |
|---------|----------|----------|----------|
| Ins2    | -2.34436 | 71.5883  | 1.57E-14 |
| Ins1    | -2.35114 | 75.53982 | 2.49E-15 |
| Scgb1c1 | -2.89033 | 35.90839 | 3.18E-07 |

|           |          |          |          |
|-----------|----------|----------|----------|
| Itfg2     | 0.472327 | 15.56201 | 0.002794 |
| Ipp       | 0.47105  | 10.0973  | 0.027599 |
| Ifitm3    | 0.468458 | 25.38308 | 3.52E-05 |
| Ifi27     | 0.467966 | 20.17374 | 0.000368 |
| Ptges3    | 0.466885 | 9.436275 | 0.035273 |
| Edf1      | 0.466737 | 12.35101 | 0.011381 |
| Ywhae     | 0.465433 | 10.45394 | 0.024104 |
| Elf3h     | 0.461199 | 11.36658 | 0.017412 |
| Aus1      | 0.457023 | 9.254004 | 0.038042 |
| Eef1b2    | 0.456979 | 14.25909 | 0.005013 |
| Pbk       | 0.456356 | 8.994751 | 0.041782 |
| Pcdha1    | 0.455357 | 11.13391 | 0.018833 |
| Tax1bp1   | 0.455159 | 9.060399 | 0.040626 |
| Atp6v0c   | 0.450028 | 13.77373 | 0.006097 |
| Kif20a    | 0.449668 | 9.058524 | 0.040626 |
| Tmed9     | 0.448624 | 10.85201 | 0.020926 |
| Gbp4      | 0.448316 | 10.64854 | 0.022623 |
| Slc4a3    | 0.441149 | 10.55835 | 0.023222 |
| Adcy4     | 0.439329 | 9.058995 | 0.040626 |
| Pphln1    | 0.439327 | 9.058978 | 0.040626 |
| Ankrd61   | 0.438364 | 14.26517 | 0.005013 |
| Abcc3     | 0.438363 | 14.26516 | 0.005013 |
| Arpc3     | 0.434527 | 8.692654 | 0.046581 |
| Dynl1     | 0.431185 | 15.22184 | 0.00322  |
| Spca1     | 0.430542 | 10.24187 | 0.025949 |
| Lamp1     | 0.426196 | 10.72419 | 0.021903 |
| Nap1l3    | 0.422173 | 9.991068 | 0.028785 |
| Smurf1    | 0.420059 | 9.658469 | 0.032396 |
| Syp       | 0.414614 | 14.39218 | 0.004738 |
| Lmnb2     | 0.406758 | 11.2535  | 0.018072 |
| Lipg      | 0.406198 | 10.24023 | 0.025949 |
| Fth1      | 0.405935 | 25.85156 | 2.88E-05 |
| Map3k6    | 0.403582 | 12.96833 | 0.008654 |
| Gnai2     | 0.401973 | 12.6503  | 0.009962 |
| Sptbn1    | 0.40026  | 8.666587 | 0.047042 |
| Clic4     | 0.397458 | 11.02891 | 0.019585 |
| Cenpu     | 0.395947 | 11.02634 | 0.019585 |
| Rarres2   | 0.39388  | 14.6163  | 0.004277 |
| RT1-CE4   | 0.390483 | 10.7537  | 0.02175  |
| Ctut1     | 0.388213 | 8.861113 | 0.043791 |
| Nup93     | 0.388213 | 8.861111 | 0.043791 |
| Gmfb      | 0.388212 | 8.861107 | 0.043791 |
| Lrp3      | 0.38821  | 8.861095 | 0.043791 |
| Eef1d     | 0.380221 | 10.01485 | 0.028596 |
| Slc25a3   | 0.372585 | 10.41347 | 0.024555 |
| Atp5po    | 0.371184 | 10.56762 | 0.023217 |
| Trim21    | 0.36794  | 11.6715  | 0.0153   |
| Eef2      | 0.363834 | 10.35971 | 0.024902 |
| Mrfap1    | 0.358052 | 9.165549 | 0.039255 |
| Kazn      | 0.357266 | 10.77369 | 0.021594 |
| Prdx1     | 0.356264 | 12.07934 | 0.012713 |
| Cenpf     | 0.339313 | 10.80631 | 0.021294 |
| Slc35a2b  | 0.333897 | 10.36173 | 0.024902 |
| Pgm2l1    | 0.331397 | 10.37466 | 0.024784 |
| Zfp772    | 0.331397 | 10.37466 | 0.024784 |
| Mtmr1     | 0.331397 | 10.37466 | 0.024784 |
| Tmem8a    | 0.331395 | 10.37465 | 0.024784 |
| Smyd3     | 0.324989 | 9.671239 | 0.032318 |
| Ckap2     | 0.320491 | 9.958297 | 0.028982 |
| Rpsa      | 0.312816 | 11.82033 | 0.014242 |
| Mgl1      | 0.312143 | 9.435779 | 0.035273 |
| Rpl7      | 0.311706 | 15.20783 | 0.003234 |
| Ttk       | 0.307606 | 9.835742 | 0.030317 |
| Eef1a1    | 0.306948 | 16.39882 | 0.001936 |
| H3f3b     | 0.306787 | 14.82257 | 0.003899 |
| Sparc     | 0.298718 | 12.33397 | 0.011409 |
| Dcx       | 0.294625 | 9.708262 | 0.031183 |
| Zfp775    | 0.293902 | 9.077822 | 0.040573 |
| Dlgap1    | 0.293902 | 9.077821 | 0.040573 |
| Srr       | 0.293902 | 9.077819 | 0.040573 |
| Cicn7     | 0.293902 | 9.077818 | 0.040573 |
| Gys1      | 0.293901 | 9.077817 | 0.040573 |
| Tmem177   | 0.293901 | 9.077817 | 0.040573 |
| Mre11a    | 0.293901 | 9.077816 | 0.040573 |
| Rps2      | 0.271676 | 9.950601 | 0.029058 |
| Cdc42     | 0.270044 | 9.627435 | 0.032757 |
| Rps3a     | 0.230511 | 9.249374 | 0.038045 |
| Rpl19     | 0.222271 | 9.887745 | 0.029698 |
| Uba52     | -0.25867 | 10.07164 | 0.027869 |
| Lipogenin | -0.27767 | 8.879529 | 0.043704 |
| Wars2     | -0.27768 | 8.879532 | 0.043704 |
| Rps27a    | -0.29109 | 12.22285 | 0.012    |
| Slamf9    | -0.29265 | 9.718424 | 0.031734 |
| Rps8      | -0.31195 | 19.33354 | 0.000536 |
| Rps20     | -0.31927 | 11.19337 | 0.018415 |
| Rps19     | -0.32189 | 16.25304 | 0.002064 |
| Rpl24     | -0.3285  | 13.96056 | 0.005679 |
| Rpl27a    | -0.33265 | 15.60272 | 0.002752 |
| Fcgr1a    | -0.33473 | 10.05109 | 0.028128 |



|           |          |          |          |
|-----------|----------|----------|----------|
| Rpl19     | -0.3544  | 17.23716 | 0.00134  |
| Rps16     | -0.35441 | 17.42527 | 0.001231 |
| Sparcl1   | -0.35507 | 9.135722 | 0.039792 |
| Cox8a     | -0.35534 | 13.04688 | 0.008443 |
| Ppp1r14a  | -0.35795 | 9.77136  | 0.031066 |
| Rpl32     | -0.37735 | 17.96854 | 0.00097  |
| Rpl28     | -0.38142 | 18.84511 | 0.000675 |
| Acox1     | -0.38295 | 9.808888 | 0.030623 |
| Mgo       | -0.38735 | 15.47445 | 0.002909 |
| Tnfrfp8l2 | -0.3971  | 13.29937 | 0.007568 |
| Ptn       | -0.39717 | 10.45704 | 0.024104 |
| Rps15     | -0.40038 | 16.89084 | 0.001565 |
| Uqcrb     | -0.41571 | 10.91065 | 0.020348 |
| Rps23     | -0.41754 | 23.06146 | 0.000104 |
| Rps24     | -0.41846 | 20.89608 | 0.00027  |
| Rpl26     | -0.4198  | 28.87208 | 7.13E-06 |
| Rps13     | -0.42406 | 23.24259 | 9.54E-05 |
| Exoc1     | -0.42832 | 10.69204 | 0.022168 |
| Rspo3     | -0.43804 | 11.3677  | 0.017412 |
| Klra17    | -0.44848 | 13.41437 | 0.007182 |
| Fau       | -0.45178 | 36.13918 | 2.48E-07 |
| Tm6b10    | -0.46814 | 39.39923 | 4.90E-08 |
| Rpl23     | -0.47357 | 34.22921 | 5.80E-07 |
| Rps27l    | -0.48667 | 8.893589 | 0.043582 |
| Bnip3l    | -0.4893  | 9.562992 | 0.033679 |
| Col7a1    | -0.49809 | 9.733883 | 0.03154  |
| Ndufa2    | -0.49858 | 10.77374 | 0.021594 |
| Pbx1      | -0.50603 | 8.711107 | 0.046438 |
| Cd68      | -0.52819 | 14.16793 | 0.005223 |
| Rps18     | -0.53624 | 31.51618 | 2.02E-06 |
| Serf2     | -0.53694 | 29.91473 | 4.30E-06 |
| Tceal1    | -0.53797 | 8.554243 | 0.048849 |
| Rps25     | -0.54006 | 25.57153 | 3.28E-05 |
| Rplp1     | -0.55708 | 36.18778 | 2.45E-07 |
| Elob      | -0.56527 | 28.50534 | 8.29E-06 |
| Snrpe     | -0.56839 | 18.66944 | 0.000725 |
| Tm7sf3    | -0.56956 | 9.655896 | 0.032396 |
| Rab38     | -0.57432 | 11.10242 | 0.019046 |
| Rpl27     | -0.57731 | 24.3994  | 5.55E-05 |
| Sem1      | -0.5919  | 22.38412 | 0.000142 |
| Rps17     | -0.59879 | 28.4648  | 8.40E-06 |
| Smim11a   | -0.60391 | 9.248118 | 0.038045 |
| Clec4a3   | -0.61473 | 16.272   | 0.002057 |
| Tcf7l2    | -0.61621 | 10.23821 | 0.025949 |
| Ppic      | -0.61927 | 13.03836 | 0.008443 |
| Ptgfrn    | -0.62182 | 10.15541 | 0.026922 |
| Gas7      | -0.62916 | 10.38043 | 0.024784 |
| Crip1     | -0.63336 | 22.58543 | 0.00013  |
| Ndufb4    | -0.63715 | 23.80144 | 7.34E-05 |
| Uqcrrq    | -0.64351 | 15.24846 | 0.003193 |
| Fos       | -0.64649 | 8.610697 | 0.048002 |
| Rgs10     | -0.65051 | 9.947113 | 0.029068 |
| Dab2      | -0.66028 | 11.22124 | 0.018281 |
| Ndufa5    | -0.66404 | 19.79383 | 0.000436 |
| Rps12     | -0.67404 | 45.66185 | 2.33E-09 |
| Atp5mf    | -0.67733 | 24.07594 | 6.41E-05 |
| Dcn       | -0.67839 | 8.629038 | 0.047802 |
| Rpl30     | -0.685   | 64.1583  | 3.51E-13 |
| Rpl31     | -0.70136 | 35.96624 | 2.62E-07 |
| Ddx3      | -0.71081 | 26.63867 | 2.01E-05 |
| Rpl35     | -0.72108 | 69.85005 | 2.48E-14 |
| Churc1    | -0.72374 | 17.79924 | 0.001034 |
| Itm2a     | -0.72762 | 20.47836 | 0.000325 |
| Smoc2     | -0.72863 | 8.877181 | 0.043704 |
| Tmem256   | -0.75732 | 18.76714 | 0.000698 |
| Rpl22l1   | -0.7607  | 32.68572 | 1.19E-06 |
| Abca8a    | -0.77779 | 15.42836 | 0.00296  |
| Cop9      | -0.79022 | 17.21678 | 0.00135  |
| Anapc13   | -0.79164 | 17.90775 | 0.000991 |
| Angptl1   | -0.80172 | 17.95975 | 0.000971 |
| Sec62     | -0.80253 | 24.87025 | 4.51E-05 |
| Elin      | -0.80691 | 9.63367  | 0.032694 |
| Rps15a    | -0.81376 | 90.39164 | 1.26E-18 |
| Fbin5     | -0.81707 | 14.67297 | 0.004174 |
| Rpl22     | -0.82856 | 58.51696 | 4.42E-12 |
| Rpl34     | -0.82958 | 88.22376 | 3.23E-18 |
| Cox17     | -0.83103 | 18.19845 | 0.000883 |
| Snrpg     | -0.83456 | 29.65658 | 4.87E-06 |
| Atp5md    | -0.84033 | 24.35373 | 5.65E-05 |
| Mtin      | -0.90684 | 25.44112 | 3.46E-05 |
| Cox6c     | -0.90846 | 60.17171 | 2.10E-12 |
| Poa2      | -0.91431 | 21.55875 | 0.000198 |
| Uqcrl0    | -0.94247 | 50.94987 | 1.81E-10 |
| Fam180a   | -0.95772 | 16.21085 | 0.002101 |
| Atp5f1e   | -0.96346 | 64.08947 | 3.54E-13 |
| Ost4      | -1.02042 | 32.18042 | 1.50E-06 |
| Atp5me    | -1.0413  | 31.96001 | 1.65E-06 |
| Rpl35al1  | -1.04138 | 140.7589 | 2.11E-29 |
| Elf2s3y   | -1.04348 | 44.39775 | 4.39E-09 |

|              |          |          |          |
|--------------|----------|----------|----------|
| Cox7c        | -1.11369 | 54.99083 | 2.43E-11 |
| Rps26        | -1.13018 | 125.5117 | 3.81E-26 |
| Gas5         | -1.13505 | 43.04298 | 8.19E-09 |
| Sl00a6       | -1.1626  | 39.4074  | 4.90E-08 |
| Plac9        | -1.19758 | 43.46657 | 6.77E-09 |
| Fcer1g       | -1.21699 | 11.83322 | 0.014174 |
| Rpl41        | -1.22134 | 155.7213 | 1.26E-32 |
| Rpl36        | -1.26942 | 181.6788 | 4.04E-38 |
| LOC100909539 | -1.2788  | 49.48256 | 3.58E-10 |
| Rpl37a       | -1.30837 | 187.3575 | 3.49E-39 |
| Rpl36a       | -1.30857 | 123.6997 | 8.76E-26 |
| Hmcn1        | -1.31306 | 32.83594 | 1.14E-06 |
| Rps21        | -1.32408 | 106.3068 | 4.89E-22 |
| C1qc         | -1.37525 | 13.22271 | 0.007763 |
| Ccl11        | -1.38451 | 9.512635 | 0.034232 |
| Tomm7        | -1.39174 | 65.34906 | 2.03E-13 |
| Sec61g       | -1.40361 | 64.61613 | 2.86E-13 |
| Lyz2         | -1.66653 | 12.54345 | 0.010382 |
| Rps27        | -1.70291 | 227.5149 | 8.04E-48 |
| Rps28        | -1.70312 | 162.4668 | 4.75E-34 |
| Rps29        | -1.74411 | 270.9058 | 8.37E-57 |
| Rpl37a-ps1   | -1.78648 | 181.8379 | 4.04E-38 |
| RT1-Db1      | -2.02688 | 9.707409 | 0.03183  |
| Cd74         | -2.08669 | 9.552343 | 0.03372  |

#### pIC11 vs PBS11

| Term                                                 | Count | %    | P-Value  | Benjamini |
|------------------------------------------------------|-------|------|----------|-----------|
| negative regulation of epithelial cell proliferation | 3     | 37.5 | 3.40E-04 | 3.10E-02  |

#### KRV11 vs pIC11

| Term                                                                              | Count | %    | P-Value  | Benjamini |
|-----------------------------------------------------------------------------------|-------|------|----------|-----------|
| defense response                                                                  | 10    | 10.9 | 1.40E-12 | 9.90E-10  |
| cellular response to interferon-beta                                              | 9     | 9.8  | 4.60E-12 | 1.70E-09  |
| response to lipopolysaccharide                                                    | 14    | 15.2 | 8.80E-10 | 2.10E-07  |
| positive regulation of T cell mediated cytotoxicity                               | 6     | 6.5  | 2.60E-08 | 4.70E-06  |
| defense response to virus                                                         | 9     | 9.8  | 1.90E-07 | 2.80E-05  |
| chemokine-mediated signaling pathway                                              | 7     | 7.6  | 3.20E-07 | 3.90E-05  |
| cellular response to interleukin-1                                                | 8     | 8.7  | 4.70E-07 | 4.90E-05  |
| antigen processing and presentation of peptide antigen via MHC class I            | 6     | 6.5  | 8.00E-07 | 7.20E-05  |
| positive regulation of apoptotic cell clearance                                   | 4     | 4.3  | 1.10E-06 | 8.70E-05  |
| cellular response to lipopolysaccharide                                           | 9     | 9.8  | 1.50E-06 | 1.10E-04  |
| response to virus                                                                 | 7     | 7.6  | 2.80E-06 | 1.80E-04  |
| immune response                                                                   | 10    | 10.9 | 5.80E-06 | 3.50E-04  |
| cellular response to interferon-gamma                                             | 6     | 6.5  | 1.10E-05 | 6.30E-04  |
| cellular response to tumor necrosis factor                                        | 7     | 7.6  | 4.60E-05 | 2.30E-03  |
| inflammatory response                                                             | 9     | 9.8  | 9.60E-05 | 4.60E-03  |
| lymphocyte chemotaxis                                                             | 4     | 4.3  | 1.60E-04 | 7.10E-03  |
| antigen processing and presentation of endogenous peptide antigen via MHC class I | 3     | 3.3  | 3.40E-04 | 1.50E-02  |
| response to interferon-gamma                                                      | 4     | 4.3  | 3.70E-04 | 1.50E-02  |
| negative regulation of viral genome replication                                   | 4     | 4.3  | 4.10E-04 | 1.50E-02  |
| response to type I interferon                                                     | 3     | 3.3  | 4.80E-04 | 1.70E-02  |
| monocyte chemotaxis                                                               | 4     | 4.3  | 4.90E-04 | 1.70E-02  |
| protein refolding                                                                 | 3     | 3.3  | 1.00E-03 | 3.20E-02  |
| positive regulation of cAMP metabolic process                                     | 3     | 3.3  | 1.00E-03 | 3.20E-02  |
| response to gamma radiation                                                       | 4     | 4.3  | 1.40E-03 | 4.30E-02  |
| response to mechanical stimulus                                                   | 5     | 5.4  | 1.60E-03 | 4.70E-02  |

#### KRV11 vs PBS11

| Term                                                | Count | %    | P-Value  | Benjamini |
|-----------------------------------------------------|-------|------|----------|-----------|
| inflammatory response                               | 15    | 17   | 5.50E-11 | 4.40E-08  |
| response to lipopolysaccharide                      | 13    | 14.8 | 4.30E-09 | 1.70E-06  |
| cellular response to interleukin-1                  | 9     | 10.2 | 1.30E-08 | 3.60E-06  |
| chemokine-mediated signaling pathway                | 7     | 8    | 2.10E-07 | 4.20E-05  |
| cellular response to interferon-beta                | 6     | 6.8  | 4.80E-07 | 6.70E-05  |
| complement activation                               | 5     | 5.7  | 5.00E-07 | 6.70E-05  |
| cellular response to tumor necrosis factor          | 8     | 9.1  | 2.30E-06 | 2.60E-04  |
| cellular response to interferon-gamma               | 6     | 6.8  | 8.00E-06 | 8.00E-04  |
| cellular response to lipopolysaccharide             | 8     | 9.1  | 1.00E-05 | 9.20E-04  |
| defense response                                    | 5     | 5.7  | 6.40E-05 | 5.20E-03  |
| lymphocyte chemotaxis                               | 4     | 4.5  | 1.30E-04 | 9.30E-03  |
| positive regulation of apoptotic cell clearance     | 3     | 3.4  | 2.00E-04 | 1.20E-02  |
| immune response                                     | 8     | 9.1  | 2.00E-04 | 1.20E-02  |
| monocyte chemotaxis                                 | 4     | 4.5  | 4.00E-04 | 2.30E-02  |
| response to tumor necrosis factor                   | 4     | 4.5  | 5.20E-04 | 2.70E-02  |
| aging                                               | 8     | 9.1  | 5.40E-04 | 2.70E-02  |
| protein kinase B signaling                          | 4     | 4.5  | 6.10E-04 | 2.90E-02  |
| response to activity                                | 5     | 5.7  | 7.90E-04 | 3.50E-02  |
| positive regulation of cAMP metabolic process       | 3     | 3.4  | 8.80E-04 | 3.60E-02  |
| positive regulation of smooth muscle cell migration | 4     | 4.5  | 8.90E-04 | 3.60E-02  |
| response to gamma radiation                         | 4     | 4.5  | 1.20E-03 | 4.50E-02  |

#### KRV11 vs KRV9

| Term                                  | Count | %    | P-Value  | Benjamini |
|---------------------------------------|-------|------|----------|-----------|
| cellular response to interferon-beta  | 7     | 14.3 | 3.60E-10 | 1.60E-07  |
| chemokine-mediated signaling pathway  | 7     | 14.3 | 7.60E-09 | 1.70E-06  |
| defense response to virus             | 8     | 16.3 | 4.00E-08 | 5.90E-06  |
| defense response                      | 6     | 12.2 | 1.60E-07 | 1.80E-05  |
| cellular response to interleukin-1    | 7     | 14.3 | 2.00E-07 | 1.80E-05  |
| cellular response to interferon-gamma | 6     | 12.2 | 5.30E-07 | 4.00E-05  |

|                                                                        |   |      |          |          |
|------------------------------------------------------------------------|---|------|----------|----------|
| cellular response to tumor necrosis factor                             | 7 | 14.3 | 1.20E-06 | 8.00E-05 |
| response to lipopolysaccharide                                         | 8 | 16.3 | 7.70E-06 | 4.30E-04 |
| inflammatory response                                                  | 8 | 16.3 | 1.10E-05 | 5.70E-04 |
| lymphocyte chemotaxis                                                  | 4 | 8.2  | 2.50E-05 | 1.10E-03 |
| response to virus                                                      | 5 | 10.2 | 6.20E-05 | 2.60E-03 |
| monocyte chemotaxis                                                    | 4 | 8.2  | 7.90E-05 | 3.00E-03 |
| response to tumor necrosis factor                                      | 4 | 8.2  | 1.00E-04 | 3.60E-03 |
| antigen processing and presentation of peptide antigen via MHC class I | 4 | 8.2  | 1.10E-04 | 3.60E-03 |
| response to gamma radiation                                            | 4 | 8.2  | 2.40E-04 | 7.10E-03 |
| positive regulation of cAMP metabolic process                          | 3 | 6.1  | 3.00E-04 | 8.40E-03 |
| neutrophil chemotaxis                                                  | 4 | 8.2  | 4.70E-04 | 1.20E-02 |
| positive regulation of cAMP-mediated signaling                         | 3 | 6.1  | 6.00E-04 | 1.50E-02 |
| positive regulation of leukocyte chemotaxis                            | 3 | 6.1  | 6.90E-04 | 1.60E-02 |
| positive regulation of monocyte chemotaxis                             | 3 | 6.1  | 1.00E-03 | 2.30E-02 |
| positive regulation of ERK1 and ERK2 cascade                           | 5 | 10.2 | 1.40E-03 | 3.00E-02 |
| cellular response to ethanol                                           | 3 | 6.1  | 2.10E-03 | 4.30E-02 |

#### KRV11 vs KRV7

| Term                                                                   | Count | %   | P-Value  | Benjamini |
|------------------------------------------------------------------------|-------|-----|----------|-----------|
| cellular response to interferon-beta                                   | 8     | 9.8 | 1.30E-10 | 9.70E-08  |
| defense response                                                       | 7     | 8.5 | 5.80E-08 | 2.00E-05  |
| cytoskeleton organization                                              | 9     | 11  | 8.00E-08 | 2.00E-05  |
| chemokine-mediated signaling pathway                                   | 7     | 8.5 | 1.70E-07 | 3.00E-05  |
| cellular response to interleukin-1                                     | 8     | 9.8 | 2.20E-07 | 3.20E-05  |
| microtubule-based process                                              | 6     | 7.3 | 8.90E-07 | 1.10E-04  |
| cellular response to interferon-gamma                                  | 6     | 7.3 | 6.60E-06 | 6.90E-04  |
| cellular response to tumor necrosis factor                             | 7     | 8.5 | 2.40E-05 | 2.20E-03  |
| response to lipopolysaccharide                                         | 9     | 11  | 2.80E-05 | 2.30E-03  |
| positive regulation of monocyte chemotaxis                             | 4     | 4.9 | 6.10E-05 | 4.50E-03  |
| lymphocyte chemotaxis                                                  | 4     | 4.9 | 1.10E-04 | 7.60E-03  |
| positive regulation of gene expression                                 | 9     | 11  | 2.00E-04 | 1.20E-02  |
| defense response to virus                                              | 6     | 7.3 | 2.30E-04 | 1.30E-02  |
| inflammatory response                                                  | 8     | 9.8 | 3.00E-04 | 1.60E-02  |
| monocyte chemotaxis                                                    | 4     | 4.9 | 3.50E-04 | 1.70E-02  |
| response to virus                                                      | 5     | 6.1 | 4.40E-04 | 2.00E-02  |
| response to tumor necrosis factor                                      | 4     | 4.9 | 4.60E-04 | 2.00E-02  |
| antigen processing and presentation of peptide antigen via MHC class I | 4     | 4.9 | 5.00E-04 | 2.10E-02  |
| cellular response to lipopolysaccharide                                | 6     | 7.3 | 7.90E-04 | 2.80E-02  |
| cellular response to fibroblast growth factor stimulus                 | 4     | 4.9 | 8.00E-04 | 2.80E-02  |
| positive regulation of cAMP metabolic process                          | 3     | 3.7 | 8.20E-04 | 2.80E-02  |
| response to gamma radiation                                            | 4     | 4.9 | 1.00E-03 | 3.40E-02  |
| response to mechanical stimulus                                        | 5     | 6.1 | 1.10E-03 | 3.40E-02  |
| positive regulation of ERK1 and ERK2 cascade                           | 6     | 7.3 | 1.30E-03 | 3.90E-02  |
| positive regulation of cAMP-mediated signaling                         | 3     | 3.7 | 1.60E-03 | 4.80E-02  |

| piC11 vs PBS11 | logFC    | LR       | pAdj     | KRV11 vs piC11 | logFC    | LR       | pAdj     | KRV11 vs PBS11 | logFC    | LR       | pAdj     | KRV11 vs KRV9 | logFC    | LR       | pAdj     | KRV11 vs KRV7 | logFC    | LR       | pAdj     | KRV9 vs KRV7 | logFC    | LR       | pAdj     |
|----------------|----------|----------|----------|----------------|----------|----------|----------|----------------|----------|----------|----------|---------------|----------|----------|----------|---------------|----------|----------|----------|--------------|----------|----------|----------|
| Arhgap35       | 0.776837 | 15.78204 | 0.016489 | Cxcl10         | 5.254144 | 106.2288 | 3.25E-22 | Cxcl10         | 5.042529 | 96.4473  | 1.58E-20 | Cxcl10        | 4.178472 | 58.10559 | 1.54E-11 | Cxcl10        | 5.395247 | 109.8332 | 7.77E-23 | Ubd          | 2.224287 | 26.75459 | 0.000159 |
| Tns3           | 0.77625  | 13.69905 | 0.034026 | Ubd            | 5.084723 | 118.1876 | 1.14E-24 | Ubd            | 4.970134 | 118.7676 | 3.04E-25 | Isg15         | 3.264241 | 75.69113 | 6.16E-15 | Isg15         | 5.195976 | 120.8376 | 4.12E-25 | LOC100910973 | 1.631141 | 22.72865 | 0.000854 |
| Mybl6l         | 0.774529 | 18.67374 | 0.004793 | LOC100910973   | 4.526468 | 166.4215 | 6.09E-35 | LOC100910973   | 4.277889 | 149.1428 | 1.11E-31 | Ubd           | 3.00606  | 31.94643 | 3.46E-06 | LOC100910973  | 4.190891 | 144.4011 | 3.97E-30 | LOC100911498 | 1.18727  | 24.30537 | 0.000451 |
| Gpx1           | 0.755659 | 13.86439 | 0.032983 | LOC100911498   | 4.196227 | 418.0568 | 7.03E-89 | LOC100911498   | 4.215668 | 433.0136 | 3.89E-92 | Isg15         | 2.573232 | 61.32003 | 3.60E-12 | Isg15         | 3.809808 | 95.26048 | 8.69E-20 | B2m          | 1.042029 | 52.85404 | 7.89E-10 |
| Rgs4           | 0.738451 | 14.88954 | 0.022886 | Isg15          | 3.732291 | 87.04157 | 3.04E-18 | B2m            | 3.319956 | 394.9479 | 3.76E-84 | Neur13        | 2.237641 | 56.75678 | 2.89E-11 | Cxcl9         | 3.022901 | 42.44811 | 1.17E-08 | Tnks         | 0.930954 | 18.91999 | 0.004371 |
| Naga           | 0.735569 | 16.06181 | 0.014885 | Cd74           | 3.20834  | 70.85215 | 8.22E-15 | Cxcl9          | 3.078327 | 55.56358 | 7.21E-12 | Cxcl9         | 2.228584 | 20.30185 | 0.000737 | MGC108823     | 3.020442 | 112.8323 | 1.97E-23 | Txc3         | 0.888781 | 23.77064 | 0.000542 |
| Nme1           | 0.727823 | 17.85422 | 0.006729 | Cxcl9          | 3.044173 | 48.70161 | 3.49E-10 | Cd74           | 2.896229 | 58.9805  | 1.37E-12 | Cd74          | 2.231038 | 43.43365 | 7.39E-09 | Cd74          | 2.731038 | 43.43365 | 7.39E-09 | Cttnr1       | 0.886201 | 17.62534 | 0.007573 |
| Pfdn1          | 0.644687 | 15.08657 | 0.021592 | MGC108823      | 2.921842 | 108.9052 | 9.26E-23 | MGC108823      | 2.8949   | 111.0607 | 1.24E-23 | Tap1          | 2.057055 | 39.34521 | 8.67E-12 | Tap1          | 2.704893 | 88.75528 | 1.88E-18 | RGD1566401   | 0.876051 | 16.7732  | 0.010038 |
| Micos13        | 0.637679 | 32.92576 | 2.50E-05 | B2m            | 2.70289  | 276.3817 | 2.51E-58 | Isg15          | 2.887385 | 58.11841 | 2.06E-12 | Cxcl11        | 1.915037 | 59.27897 | 0.000388 | Irf1          | 2.376802 | 73.92028 | 2.62E-15 | Dhdds        | 0.873164 | 18.87815 | 0.004371 |
| Rnuf6          | 0.632296 | 17.88064 | 0.006729 | Ifi27          | 2.700594 | 186.1371 | 4.02E-39 | Psmb8          | 2.81797  | 115.4311 | 1.60E-24 | Gbp2          | 1.843563 | 32.69605 | 2.55E-06 | Neur13        | 2.345595 | 55.56949 | 2.19E-11 | Cat          | 0.836732 | 16.16665 | 0.011795 |
| Dps17          | 0.627517 | 30.17061 | 7.09E-05 | Psmb9          | 2.639988 | 98.46181 | 1.24E-20 | Psmb9          | 2.634486 | 105.0387 | 2.32E-22 | Irf1          | 1.842511 | 52.77132 | 1.74E-10 | Psmb8         | 2.336079 | 83.22477 | 2.61E-17 | RT1-CE10     | 0.823135 | 22.1594  | 0.001067 |
| Uduf5          | 0.619232 | 21.84082 | 0.001546 | Tap1           | 2.599116 | 84.36724 | 1.12E-17 | Tap1           | 2.500127 | 82.19338 | 1.60E-17 | RT1-CE5       | 1.724158 | 71.88711 | 3.63E-14 | Psmb9         | 2.161621 | 70.9417  | 1.12E-14 | Dusp8        | 0.821934 | 13.75724 | 0.029126 |
| B2m            | 0.609251 | 23.30707 | 0.000848 | Psmb8          | 2.563598 | 96.64448 | 3.01E-20 | Stat1          | 2.421649 | 79.80575 | 4.98E-17 | Psmb10        | 1.712019 | 62.80135 | 2.12E-12 | Stat1         | 2.123231 | 60.6999  | 1.73E-12 | MGC108823    | 0.815175 | 14.7947  | 0.020249 |
| Pskh1          | 0.608713 | 17.2171  | 0.008925 | Psmb10         | 2.327978 | 89.00474 | 1.26E-18 | Serping1       | 2.383682 | 95.62853 | 2.31E-20 | Psmb9         | 1.618686 | 50.59045 | 4.53E-10 | Cxcl11        | 2.093599 | 23.9368  | 7.21E-05 | Cln3         | 0.805471 | 15.9245  | 0.01316  |
| Mrlp154        | 0.594385 | 13.69431 | 0.034026 | Stat1          | 2.205741 | 63.96938 | 2.29E-13 | Psmb10         | 2.358258 | 95.12229 | 2.94E-20 | Stat1         | 1.600896 | 39.40659 | 9.59E-08 | Gbp2          | 2.027642 | 42.42145 | 1.17E-08 | Psmb8        | 0.787374 | 12.69525 | 0.044232 |
| Rps18          | 0.589255 | 33.83975 | 2.08E-05 | RT1-S3         | 2.203637 | 71.1537  | 7.19E-15 | Neur13         | 2.220877 | 61.31024 | 4.44E-13 | Rtp4          | 1.569882 | 41.96109 | 2.88E-08 | Ifi47         | 1.947809 | 54.76523 | 3.23E-11 | Zfhx2        | 0.779461 | 16.23291 | 0.011795 |
| Rpl18a         | 0.572561 | 27.77149 | 0.000178 | Neur13         | 2.119888 | 44.46414 | 2.66E-09 | RT1-CE5        | 2.063715 | 82.18014 | 1.60E-17 | Psmb8         | 1.539378 | 46.41657 | 3.33E-09 | Ifitm3        | 1.920575 | 20.45268 | 0.000348 | Myt1         | 0.778328 | 13.78523 | 0.029126 |
| Atp6v1f        | 0.567975 | 20.07513 | 0.00338  | Zbed5          | 2.103137 | 187.3732 | 2.59E-39 | RT1-CE10       | 2.055266 | 99.1819  | 4.16E-21 | Ifi47         | 1.507033 | 32.24606 | 3.11E-06 | Rtp4          | 1.88668  | 52.9054  | 7.81E-11 | Ap3d1        | 0.772704 | 13.15698 | 0.037894 |
| Ndufa11        | 0.567171 | 16.90548 | 0.010254 | RT1-A1         | 2.051447 | 73.39028 | 1.87E-15 | Zbed5          | 1.986962 | 171.5774 | 2.14E-36 | Cd74          | 1.450621 | 10.93069 | 0.041328 | Psmb10        | 1.839141 | 61.33596 | 1.28E-12 | Cdc27        | 0.757941 | 14.75879 | 0.020326 |
| Rpl32          | 0.556269 | 43.40217 | 4.65E-07 | RT1-CE5        | 1.97109  | 73.37687 | 2.43E-15 | RT1-A1         | 1.942349 | 69.76144 | 7.05E-15 | Zbed5         | 1.418809 | 124.664  | 6.72E-25 | Serping1      | 1.817652 | 57.80733 | 1.18E-12 | Golg4        | 0.752648 | 17.17181 | 0.008853 |
| Citrn          | 0.533607 | 26.88579 | 0.000225 | Serping1       | 1.953593 | 67.17992 | 4.82E-14 | Irf1           | 1.940894 | 53.23969 | 2.18E-11 | Mx2           | 1.382879 | 23.43603 | 0.000167 | RT1-CE5       | 1.806214 | 62.57746 | 7.00E-13 | Alfmid       | 0.743201 | 16.1898  | 0.011795 |
| Rps25          | 0.518526 | 19.41057 | 0.004076 | Rtp4           | 1.937997 | 57.17496 | 6.03E-12 | Ifitm3         | 1.902018 | 28.32832 | 3.03E-06 | Parp14        | 1.377982 | 32.19062 | 3.11E-06 | Oasl2         | 1.772424 | 43.627   | 6.89E-08 | Sbds         | 0.731804 | 12.34436 | 0.049558 |
| Rps3           | 0.510625 | 20.86938 | 0.002333 | Gbp2           | 1.922543 | 40.77713 | 1.46E-08 | Gbp2           | 1.876598 | 41.35463 | 6.23E-09 | Ifi27         | 1.353293 | 67.38642 | 2.49E-13 | Irgm          | 1.764599 | 43.31826 | 7.71E-09 | Nap3k7       | 0.730313 | 12.87016 | 0.040862 |
| Micos10        | 0.504992 | 13.84016 | 0.032983 | Ube2i6         | 1.866049 | 59.90952 | 1.55E-12 | Cxcl11         | 1.862652 | 19.23106 | 0.000211 | RT1-A1        | 1.324602 | 34.87044 | 8.79E-07 | Irf7          | 1.721081 | 35.69413 | 2.77E-07 | Birc6        | 0.726043 | 13.79392 | 0.029126 |
| Rpl9           | 0.502899 | 36.26267 | 9.00E-06 | Parp14         | 1.864282 | 53.9428  | 2.84E-11 | Ifi47          | 1.781254 | 46.72328 | 4.98E-10 | Irgm          | 1.316907 | 26.94042 | 3.39E-05 | Oasl2         | 1.311533 | 116.9968 | 2.62E-24 | RGD1566099   | 0.724834 | 16.39746 | 0.011508 |
| Rpl11          | 0.500619 | 30.11382 | 7.09E-05 | Psmel          | 1.845067 | 129.9895 | 3.45E-27 | Psmel          | 1.760453 | 128.3707 | 2.97E-27 | Oasl2         | 1.311533 | 12.35974 | 0.00028  | RT1-Da        | 1.643293 | 34.04258 | 6.20E-07 | Tri1         | 0.723569 | 16.97829 | 0.009435 |
| Ndufb8         | 0.500281 | 13.37348 | 0.039767 | Psm2e          | 1.842443 | 80.68686 | 6.85E-17 | Manf           | 1.732225 | 69.6468  | 7.40E-15 | Irf7          | 1.304062 | 22.02617 | 0.000326 | RT1-Da        | 1.643293 | 34.04258 | 6.20E-07 | LOC100362110 | 0.707026 | 20.856   | 0.001942 |
| Cish           | 0.491472 | 12.9139  | 0.047958 | Cxcl11         | 1.816837 | 15.52775 | 0.001863 | Oasl2          | 1.713755 | 45.87592 | 7.51E-10 | Pheta2        | 1.300965 | 45.56786 | 4.98E-09 | RT1-A1        | 1.622566 | 44.08211 | 5.55E-09 | Peg3         | 0.692289 | 29.66373 | 4.03E-05 |
| Rps16          | 0.489195 | 22.37843 | 0.001298 | Ifi47          | 1.814028 | 47.49721 | 6.31E-10 | Isg20          | 1.679364 | 54.91009 | 9.77E-12 | RT1-S3        | 1.293366 | 27.5266  | 2.70E-05 | Parp9         | 1.547036 | 38.16391 | 8.78E-08 | Sf3b6        | 0.690021 | 14.57645 | 0.021417 |
| Rplp0          | 0.484744 | 25.64632 | 0.000389 | Irf1           | 1.792597 | 42.85308 | 5.63E-09 | Rtp4           | 1.677771 | 45.58939 | 8.50E-10 | Stat2         | 1.279359 | 36.57582 | 3.80E-07 | Ube2i6        | 1.536462 | 41.35585 | 1.95E-08 | Slc9a1       | 0.689564 | 14.16136 | 0.024895 |
| Rpl29          | 0.478767 | 22.03584 | 0.00147  | Irf7           | 1.774361 | 42.2277  | 7.49E-09 | Ifi27          | 1.661466 | 89.08043 | 5.41E-19 | Lgals3bp      | 1.254142 | 40.67677 | 5.13E-08 | Parp14        | 1.505402 | 33.20602 | 9.06E-07 | Prrc2c       | 0.688181 | 33.63582 | 6.63E-06 |
| Ddx5           | 0.478671 | 15.07338 | 0.021592 | Oasl2          | 1.773446 | 46.11002 | 1.23E-09 | RT1-A2         | 1.646259 | 62.99711 | 1.95E-13 | Serping1      | 1.235018 | 34.85714 | 8.79E-07 | Mx2           | 1.471546 | 24.73783 | 4.92E-05 | Kcnk16       | 0.681428 | 15.54539 | 0.014499 |
| Rpl21          | 0.475297 | 16.49868 | 0.012397 | Ifitm3         | 1.722641 | 14.76451 | 0.002625 | Psm2e          | 1.636374 | 71.09411 | 3.69E-15 | Manf          | 1.209663 | 41.57305 | 3.42E-08 | Isg20         | 1.456573 | 39.45325 | 4.83E-08 | Pum1         | 0.674221 | 12.56923 | 0.046299 |
| Rpl13a         | 0.464973 | 18.90812 | 0.004619 | Parp9          | 1.698633 | 49.37263 | 2.53E-10 | Parp14         | 1.623941 | 42.29959 | 4.08E-09 | Ifi3          | 1.197504 | 17.88634 | 0.002196 | RT1-S3        | 1.430624 | 30.94997 | 2.58E-06 | Ranbp2       | 0.668759 | 13.06496 | 0.038866 |
| Rpl14          | 0.460064 | 23.50389 | 0.000813 | Manf           | 1.661224 | 62.77818 | 4.00E-13 | Irgm           | 1.607493 | 37.82307 | 3.43E-08 | Parp9         | 1.174433 | 25.17318 | 7.30E-05 | Tmem140       | 1.372676 | 34.87502 | 4.13E-07 | Pcm1         | 0.66233  | 13.11305 | 0.038331 |
| Tmem10         | 0.454901 | 19.49792 | 0.004076 | Isg20          | 1.652506 | 49.89909 | 2.00E-10 | RT1-Da         | 1.58624  | 39.80622 | 1.31E-08 | Isg20         | 1.172804 | 33.27379 | 1.94E-06 | Pheta2        | 1.311994 | 39.54253 | 4.68E-08 | Cdk2ap1      | 0.662236 | 19.26027 | 0.003795 |
| Rps11          | 0.453285 | 15.19639 | 0.021073 | RT1-CE10       | 1.620377 | 63.83051 | 2.42E-13 | Irf7           | 1.536244 | 31.17339 | 7.90E-07 | Usp18         | 1.127511 | 19.19438 | 0.001218 | Stat2         | 1.311294 | 32.55665 | 1.22E-06 | Ap2d1        | 0.639977 | 14.16505 | 0.024895 |
| Eef1b2         | 0.4466   | 14.2795  | 0.02886  | Irgm           | 1.617894 | 37.48099 | 7.33E-08 | Tapbp          | 1.52318  | 42.55312 | 3.64E-09 | RT1-Da        | 1.108622 | 13.88403 | 0.012688 | Tapbp         | 1.307535 | 31.75775 | 1.78E-06 | Mbn12        | 0.61553  | 18.42518 | 0.005244 |
| Rpl35          | 0.446257 | 25.27825 | 0.000432 | Pheta2         | 1.606466 | 57.01161 | 6.46E-12 | Pheta2         | 1.475843 | 50.29639 | 8.90E-11 | Ube2i6        | 1.090867 | 26.1438  | 4.81E-05 | Irf7          | 1.295941 | 22.3882  | 0.000151 | Ppp1r9a      | 0.602893 | 12.93033 | 0.040339 |
| Rps19          | 0.44581  | 18.66165 | 0.004793 | Tapbp          | 1.601833 | 45.33936 | 2.58E-09 | Bst2           | 1.460114 | 36.36256 | 6.78E-08 | Tmem140       | 1.080394 | 27.37866 | 2.78E-05 | Isg2          | 1.281705 | 25.43948 | 3.56E-05 | Anapc10      | 0.602893 | 12.93033 | 0.040339 |
| Rps3a          | 0.445486 | 24.46163 | 0.000565 | Bst2           | 1.598868 | 41.50289 | 1.05E-08 | Igtp           | 1.434387 | 38.309   | 2.69E-08 | Apol9a        | 1.073923 | 18.8887  | 0.000342 | Bt2           | 1.24256  | 24.70672 | 4.96E-05 | Calr         | 0.601726 | 28.58943 | 7.02E-05 |
| Rps23          | 0.44522  | 27.08656 | 0.000225 | RT1-Da         | 1.588739 | 32.62208 | 7.20E-07 | Rgs4           | 1.410067 | 60.56724 | 6.37E-13 | Igtp          | 1.041537 | 18.42013 | 0.001732 | Manf          | 1.237034 | 39.81416 | 6.13E-08 | Pja2         | 0.592418 | 14.16416 | 0.024895 |
| Hadh           | 0.432198 | 14.07876 | 0.030504 | Mx2            | 1.52047  | 29.43829 | 3.14E-06 | Rn18           |          |          |          |               |          |          |          |               |          |          |          |              |          |          |          |

| KRV11 vs piC11 | logFC    | LR       | pAdj      | KRV11 vs PBS11 | logFC    | LR       | pAdj      | KRV11 vs KRV9 | logFC    | LR       | pAdj        | KRV11 vs KRV7 | logFC    | LR       | pAdj     | KRV9 vs KRV7 | logFC    | LR       | pAdj        |
|----------------|----------|----------|-----------|----------------|----------|----------|-----------|---------------|----------|----------|-------------|---------------|----------|----------|----------|--------------|----------|----------|-------------|
| LOC100911498   | 4.17161  | 1112.529 | 2.34E-240 | LOC100911498   | 4.284281 | 866.3326 | 7.52E-187 | Isg15         | 3.077752 | 148.7477 | 7.38E-31    | LOC100910973  | 3.414081 | 242.2453 | 1.19E-51 | LOC100911498 | 1.079119 | 29.72949 | 9.83E-06    |
| LOC100910973   | 3.732556 | 260.6064 | 7.90E-56  | LOC100910973   | 4.117291 | 249.657  | 1.36E-53  | Ubd           | 2.849657 | 35.26156 | 3.40E-07    | Ubd           | 3.411371 | 96.90714 | 1.48E-20 | LOC100910973 | 0.8229   | 24.46771 | 0.000120664 |
| Isg15          | 3.428065 | 174.9953 | 2.04E-37  | B2m            | 3.209209 | 713.6557 | 8.84E-154 | LOC100910973  | 2.600049 | 136.7624 | 2.20E-28    | MGC108823     | 3.034794 | 184.4998 | 2.46E-39 | Gadd45g      | 0.756164 | 51.80837 | 2.88E-10    |
| Ubd            | 3.381684 | 95.62902 | 1.92E-20  | Ubd            | 3.207043 | 76.92539 | 1.73E-16  | MGC108823     | 2.435539 | 90.00061 | 1.12E-18    | Isg15         | 2.855353 | 116.8948 | 8.49E-25 | Cxcl10       | 0.755676 | 15.37858 | 0.006051852 |
| MGC108823      | 2.994057 | 180.0022 | 1.81E-38  | MGC108823      | 2.843669 | 140.9477 | 2.80E-30  | Tap1          | 2.245471 | 113.5058 | 1.46E-23    | Tap1          | 2.658289 | 170.1809 | 2.81E-36 | LOC100362110 | 0.724946 | 46.06186 | 4.31E-09    |
| Ifi27          | 2.736458 | 168.5016 | 5.05E-36  | Psmb8          | 2.484401 | 148.6349 | 6.23E-32  | Neur13        | 1.761018 | 52.03631 | 1.14E-10    | Psmb9         | 2.146545 | 128.3432 | 2.94E-27 | Myl6l        | 0.722362 | 60.75689 | 4.29E-12    |
| Tap1           | 2.553426 | 159.2761 | 4.82E-34  | Psmb9          | 2.395978 | 132.8196 | 1.56E-28  | Stat1         | 1.752581 | 74.06418 | 2.76E-15    | Psmb8         | 2.063688 | 128.0862 | 3.17E-27 | Klf9         | 0.689286 | 24.21706 | 0.000134849 |
| Stat1          | 2.390982 | 135.8393 | 5.07E-29  | Tap1           | 2.386271 | 122.1312 | 3.13E-26  | Irgm          | 1.745077 | 90.99067 | 7.11E-19    | Stat1         | 2.047283 | 96.61032 | 1.66E-20 | Pclrf        | 0.688452 | 19.80382 | 0.000958447 |
| Psmb9          | 2.293814 | 141.3693 | 3.26E-30  | Isg15          | 2.238449 | 67.7394  | 1.53E-14  | Ifi47         | 1.743314 | 77.52869 | 4.94E-16    | Irgm          | 1.987072 | 111.5615 | 1.14E-23 | Abcd3        | 0.671669 | 24.89274 | 9.91E-05    |
| Psmb8          | 2.242515 | 145.8567 | 3.65E-31  | Stat1          | 2.151774 | 96.40923 | 1.13E-20  | Psmb8         | 1.679446 | 93.9824  | 2.00E-19    | Neur13        | 1.981089 | 92.23103 | 1.35E-19 | Cadps        | 0.648302 | 19.28829 | 0.001219144 |
| Irgm           | 2.201748 | 138.7343 | 1.20E-29  | Irgm           | 2.121227 | 111.3334 | 6.72E-24  | Psmb9         | 1.587234 | 78.28537 | 3.48E-16    | Ifi47         | 1.912522 | 101.0707 | 1.95E-21 | Dusp8        | 0.644624 | 21.8492  | 0.000400869 |
| B2m            | 2.075568 | 456.3204 | 4.88E-98  | RT1-CE5        | 2.06708  | 129.4123 | 8.32E-28  | RT1-CE5       | 1.577113 | 92.76635 | 3.51E-19    | LOC100911498  | 1.905263 | 226.2719 | 3.11E-48 | MGC108823    | 0.62958  | 15.73815 | 0.005507421 |
| RT1-CE5        | 2.045621 | 142.7318 | 1.72E-30  | RT1-A1         | 1.87528  | 116.1443 | 6.09E-25  | Gbp2          | 1.551433 | 49.49409 | 3.95E-10    | Irf1          | 1.901115 | 101.9092 | 1.30E-21 | Nudt4        | 0.627992 | 41.69567 | 3.44E-08    |
| Zbed5          | 2.011741 | 348.6798 | 9.23E-75  | Ifi47          | 1.85107  | 86.54335 | 1.52E-18  | Irf1          | 1.518963 | 65.97106 | 1.26E-13    | Gbp2          | 1.730612 | 82.70094 | 1.51E-17 | Ring1        | 0.605307 | 18.39184 | 0.0018442   |
| RT1-S3         | 1.944327 | 114.5369 | 1.67E-24  | Neur13         | 1.811327 | 71.46661 | 2.55E-15  | Mx2           | 1.469704 | 62.35722 | 7.73E-13    | Cxcl10        | 1.723775 | 36.821   | 7.73E-08 | Tmx4         | 0.603387 | 24.03882 | 0.0001459   |
| Neur13         | 1.904459 | 81.73948 | 1.78E-17  | Irf1           | 1.795881 | 82.66432 | 1.01E-17  | Rtp4          | 1.370566 | 58.55504 | 4.76E-12    | RT1-CE5       | 1.715562 | 105.0961 | 2.78E-22 | Usp9x        | 0.602776 | 30.37714 | 7.43E-06    |
| Ifi47          | 1.811847 | 89.28817 | 4.41E-19  | Zbed5          | 1.676278 | 225.4048 | 1.94E-48  | Oasl2         | 1.366706 | 58.69603 | 4.53E-12    | Cd74          | 1.621024 | 29.52156 | 2.73E-06 | Ubd          | 0.598047 | 13.51636 | 0.012782432 |
| Irf1           | 1.754364 | 88.81894 | 5.53E-19  | Psmb10         | 1.65661  | 88.54235 | 5.60E-19  | Ifi27         | 1.349126 | 49.21322 | 4.41E-10    | Igtg          | 1.451766 | 56.82883 | 4.76E-12 | Mcl1         | 0.594447 | 16.26567 | 0.004373554 |
| Cd74           | 1.739114 | 36.84225 | 5.71E-08  | RT1-A2         | 1.64933  | 92.6025  | 7.42E-20  | Psmb10        | 1.297063 | 69.35158 | 2.59E-14    | Rtp4          | 1.409877 | 68.80093 | 1.33E-14 | Cdv3         | 0.594161 | 18.08616 | 0.002018449 |
| Gbp2           | 1.68907  | 80.6951  | 2.90E-17  | Cd74           | 1.625724 | 30.5474  | 1.06E-06  | Pheta2        | 1.267331 | 67.49405 | 5.99E-14    | Psmb10        | 1.390806 | 79.32976 | 7.97E-17 | Peg3         | 0.588554 | 54.38175 | 8.47E-11    |
| Manf           | 1.626766 | 133.3404 | 1.75E-28  | Il18bp         | 1.591298 | 77.73182 | 1.16E-16  | Parp9         | 1.228095 | 46.65841 | 1.47E-09    | Tapbp         | 1.381287 | 67.05808 | 3.08E-14 | Psmb9        | 0.569315 | 14.81266 | 0.007525046 |
| Cxcl10         | 1.618345 | 22.83368 | 4.62E-05  | Cxcl10         | 1.589186 | 29.323   | 1.88E-06  | Tapbp         | 1.206464 | 52.25393 | 1.04E-10    | Oasl2         | 1.367523 | 60.51799 | 7.64E-13 | Smarrc1      | 0.569308 | 17.71638 | 0.002295812 |
| Mx2            | 1.572048 | 76.55559 | 2.31E-16  | Gbp2           | 1.57803  | 63.76924 | 1.09E-13  | Zbed5         | 1.198353 | 154.4809 | 5.15E-32    | Mx2           | 1.362422 | 51.53975 | 6.44E-11 | Tomrn70      | 0.566605 | 15.02239 | 0.00700895  |
| Pheta2         | 1.570235 | 102.6912 | 5.72E-22  | Serping1       | 1.570975 | 104.8478 | 1.69E-22  | Cd74          | 1.165486 | 13.6759  | 0.009182609 | Abcd3         | 1.251201 | 71.15215 | 4.36E-15 | Ntm          | 0.563599 | 14.53895 | 0.006851212 |
| Psmb10         | 1.564933 | 93.19473 | 6.50E-20  | Ifi27          | 1.568256 | 49.41788 | 1.21E-10  | Prss1         | 1.165147 | 40.92896 | 2.18E-08    | Parp9         | 1.224792 | 45.62745 | 1.11E-09 | Pdcd6ip      | 0.560619 | 15.1087  | 0.000581852 |
| RT1-A1         | 1.552861 | 81.49836 | 1.99E-17  | RT1-CE10       | 1.521798 | 69.30791 | 7.09E-15  | RT1-A1        | 1.156995 | 46.09296 | 1.91E-09    | Tmem140       | 1.179653 | 61.0922  | 5.82E-13 | Shprh        | 0.558223 | 16.39236 | 0.004126956 |
| Ube2l6         | 1.541021 | 89.48592 | 4.08E-19  | Manf           | 1.475663 | 94.76771 | 2.54E-20  | RT1-S3        | 1.144281 | 45.68263 | 2.25E-09    | Parp14        | 1.176244 | 48.81598 | 2.37E-10 | Trpc4ap      | 0.556459 | 14.41316 | 0.00888174  |
| Oasl2          | 1.497323 | 83.82093 | 6.48E-18  | Igfbp2         | 1.444673 | 43.03122 | 2.72E-09  | Parp14        | 1.12756  | 44.89949 | 3.26E-09    | RT1-S3        | 1.164077 | 43.50692 | 3.06E-09 | Ddx1         | 0.554529 | 17.78393 | 0.002233319 |
| Parp9          | 1.425065 | 65.05951 | 6.48E-14  | Psmc1          | 1.4332   | 168.0592 | 4.42E-36  | Igtg          | 1.113875 | 31.72402 | 1.83E-06    | MGC105567     | 1.107176 | 51.91447 | 5.42E-11 | Vegfa        | 0.549064 | 18.163   | 0.001972039 |
| Rtp4           | 1.412895 | 70.60843 | 4.18E-15  | Oasl2          | 1.390154 | 63.96475 | 1.01E-13  | Usp18         | 1.088462 | 35.73876 | 2.75E-07    | RGD1309362    | 1.106694 | 40.37427 | 1.34E-08 | Tmem168      | 0.542392 | 19.03688 | 0.001377529 |
| Psmc1          | 1.367103 | 174.7538 | 2.24E-37  | Pla2g16        | 1.351829 | 60.70661 | 4.97E-13  | Usp18         | 1.079374 | 36.17773 | 2.24E-07    | Usp18         | 1.100645 | 60.064   | 9.54E-13 | Cdcd184      | 0.540373 | 18.29007 | 0.001893749 |
| Hist2h2ab      | 1.361373 | 81.80886 | 1.74E-17  | Tapbp          | 1.351557 | 56.43138 | 4.03E-12  | Phf11         | 1.053108 | 32.08771 | 1.55E-06    | Il18bp        | 1.091403 | 45.45447 | 1.20E-09 | Hipk2        | 0.539183 | 13.71222 | 0.011611424 |
| Hspa1a         | 1.350394 | 43.91727 | 1.92E-09  | Tmem140        | 1.339521 | 67.97963 | 1.37E-14  | Irf7          | 1.023068 | 35.63644 | 2.84E-07    | Manf          | 1.081885 | 64.58296 | 1.02E-13 | Hnrnpu       | 0.532376 | 21.29547 | 0.000522458 |
| Il18bp         | 1.292218 | 58.34435 | 1.71E-12  | Rn18s          | 1.338831 | 191.0113 | 4.00E-41  | Pkm           | 0.998929 | 47.00515 | 1.29E-09    | Pdgfra        | 1.0717   | 44.79536 | 1.64E-09 | Kidins220    | 0.529908 | 14.23611 | 0.009474091 |
| Serping1       | 1.289689 | 85.73084 | 2.52E-18  | Isg20          | 1.28534  | 76.69215 | 1.93E-16  | Ccl5          | 0.995596 | 10.54836 | 0.034027059 | Serping1      | 1.056508 | 62.73    | 2.58E-13 | Sptbn1       | 0.529119 | 19.95005 | 0.000924483 |
| Tapbp          | 1.285187 | 56.23809 | 4.69E-12  | Inpp1          | 1.238471 | 53.85735 | 1.41E-11  | Pdgfra        | 0.983125 | 37.27278 | 1.34E-07    | Usp18         | 1.02823  | 29.69615 | 2.51E-06 | Ubc          | 0.528588 | 32.6397  | 2.55E-06    |
| Igtg           | 1.256963 | 42.56404 | 3.75E-09  | Igtg           | 1.209413 | 36.02163 | 7.91E-08  | Hist2h2ab     | 0.965272 | 43.6093  | 6.08E-09    | Actb          | 1.015691 | 241.8237 | 1.36E-51 | Cd59         | 0.526849 | 35.12578 | 8.11E-07    |
| Usp18          | 1.256381 | 49.42924 | 1.34E-10  | Rn45s          | 1.208997 | 223.5501 | 4.79E-48  | Tmem140       | 0.954446 | 43.45888 | 6.45E-09    | Psmc1         | 1.007066 | 113.1326 | 5.27E-24 | Klf13        | 0.525532 | 15.57417 | 0.005690881 |
| Pkm            | 1.24705  | 69.61036 | 6.88E-15  | Hist2h2ab      | 1.190085 | 56.40663 | 4.06E-12  | Manf          | 0.933027 | 55.618   | 2.03E-11    | Pheta2        | 1.004618 | 42.75785 | 4.34E-09 | Prrc2c       | 0.520878 | 35.64779 | 6.50E-07    |
| Isg20          | 1.203088 | 81.26805 | 2.19E-17  | Rbp4           | 1.186935 | 181.2029 | 6.48E-39  | Psmc1         | 0.905883 | 92.49724 | 3.64E-19    | Zbed5         | 0.9964   | 109.7099 | 2.77E-23 | Chmp4c       | 0.516983 | 14.46892 | 0.00868889  |
| Tmem140        | 1.197448 | 63.34347 | 1.51E-13  | Fosb           | 1.185957 | 34.02712 | 2.06E-07  | MGC105567     | 0.905437 | 27.6952  | 1.29E-05    | RT1-A1        | 0.982567 | 35.18789 | 1.72E-07 | Rhoa         | 0.516543 | 20.7096  | 0.00066257  |
| Prss1          | 1.175473 | 47.99875 | 2.69E-10  | Pheta2         | 1.166649 | 50.69331 | 6.50E-11  | Inpp1         | 0.899911 | 33.76352 | 6.78E-07    | ApoH          | 0.974564 | 31.08385 | 1.28E-06 | Hspa4        | 0.514885 | 15.25069 | 0.006321535 |
| Mrps28         | 1.168005 | 56.09226 | 5.01E-12  | Rtp4           | 1.159341 | 38.48856 | 2.46E-08  | Stat2         | 0.886208 | 29.06803 | 6.65E-06    | Inpp1         | 0.964757 | 38.53646 | 3.37E-08 | LOC303448    | 0.513896 | 13.1214  | 0.014969994 |
| Psmc2          | 1.165846 | 71.41416 | 2.88E-15  | Ifi27l2b       | 1.154268 | 52.49224 | 2.69E-11  | Cope          | 0.868842 | 30.28428 | 3.71E-06    | Isg20         | 0.960775 | 56.1718  | 6.59E-12 | Jmjcd6       | 0.512846 | 13.46914 | 0.013000101 |
| Wnt4           | 1.142036 | 81.38486 | 2.09E-17  | RT1-S3         | 1.146041 | 37.24782 | 4.42E-08  | Ifi27l2b      | 0.862289 | 37.04515 | 1.49E-07    | Cope          | 0.956738 | 37.32112 | 6.08E-08 | Cish         | 0.511636 | 13.28684 | 0.014023862 |
| RGD1309362     | 1.140446 | 51.40858 | 5.02E-11  | Elf6           | 1.123544 | 70.34615 | 4.28E-15  | Ube2l6        | 0.859756 | 32.64543 | 1.17E-06    | Stat2         | 0.955185 | 37.40653 | 5.85E-08 | Immt         | 0.50905  | 12.63029 | 0.018535325 |
| Psmc7          | 1.130538 | 156.153  | 2.26E-33  | Ogfr           | 1.110692 | 45.72046 | 7.33E-10  | LOC100911498  | 0.85647  | 38.02584 | 9.30E-08    | Apol9a        | 0.928311 | 37.47758 | 5.70E-08 | Thoc6        | 0.502465 | 12.03988 | 0.023182934 |
| Cope           | 1.110026 | 53.65346 | 1.64E-11  | Pdgfra         | 1.080481 | 41.86829 | 4.87E-09  | Armc3         | 0.846008 | 25.80981 | 3.12E-05    | Bst2          | 0.91668  | 35.47618 | 1.51E-07 | Polr2m       | 0.500991 | 14.50262 | 0.008581212 |
| Ctrb1          | 1.096522 | 45.9624  | 7.09E-10  | Raly           | 1.08007  | 49.2562  | 1.31E-10  | Apol9a        | 0.835164 | 26.77053 | 1.98E-05    | Ifi27         | 0.913142 | 24.43784 | 3.07E-05 | Mrps155      | 0.500506 | 15.44271 | 0.005958927 |
| Parp14         | 1.09245  | 42.51116 | 3.83E-09  | Parp14         | 1.070661 | 37.24178 | 4.42E-08  | Trnaulap      | 0.817333 | 26.96311 | 1.81E-05    | Pkm           | 0.909601 | 40.40073 | 1.33E-08 | Prpf8        | 0.500123 | 12.58635 | 0.0187      |

| KRV11 vs pCi11 | logFC    | LR       | pAdj        | KRV11 vs PBS11 | logFC    | LR       | pAdj      | KRV11 vs KRV9 | logFC    | LR       | pAdj        | KRV11 vs KRV7 | logFC    | LR       | pAdj        | KRV9 vs KRV7 | logFC    | LR       | pAdj        |
|----------------|----------|----------|-------------|----------------|----------|----------|-----------|---------------|----------|----------|-------------|---------------|----------|----------|-------------|--------------|----------|----------|-------------|
| Ubd            | 5.225654 | 154.2694 | 9.65E-33    | Ubd            | 5.155396 | 231.6082 | 1.80E-49  | Cxc11         | 3.48101  | 69.13319 | 3.62E-14    | Cxc11         | 5.256059 | 200.5205 | 1.76E-42    | Cc15         | 3.383881 | 30.31593 | 1.78E-05    |
| Cxc111         | 5.197856 | 152.9148 | 1.84E-32    | Cxc111         | 5.025404 | 217.9441 | 1.41E-46  | Ubd           | 3.370621 | 65.87302 | 1.73E-13    | Ubd           | 5.203225 | 193.8472 | 3.95E-41    | Cc19         | 2.050463 | 49.6107  | 1.74E-09    |
| Cxc10          | 4.712479 | 148.7602 | 1.33E-31    | Cxc19          | 4.465521 | 221.0286 | 3.13E-47  | Cxc19         | 2.529294 | 48.24743 | 7.28E-10    | Cxc19         | 4.546922 | 194.3477 | 3.30E-41    | Ubd          | 1.884927 | 24.9399  | 0.00020434  |
| Cxc19          | 4.563299 | 152.5279 | 2.15E-32    | LOC100911498   | 4.452684 | 1237.928 | 4.25E-267 | Cd74          | 2.52601  | 46.18337 | 1.93E-09    | Cxc10         | 4.177999 | 115.2107 | 3.04E-24    | Cxc11        | 1.803878 | 26.04343 | 0.000130212 |
| LOC100911498   | 4.501983 | 804.6128 | 6.40E-173   | Cxc10          | 4.359986 | 194.541  | 1.32E-41  | Cxc10         | 2.49973  | 38.29057 | 8.36E-08    | Cc15          | 4.02341  | 50.53923 | 1.26E-10    | LOC100911498 | 1.715649 | 90.55826 | 3.62E-18    |
| Cc15           | 4.08242  | 38.50504 | 3.68E-08    | Cc15           | 4.331572 | 84.35091 | 4.32E-18  | Wars          | 2.048445 | 125.1997 | 7.02E-26    | Gbp2          | 2.560268 | 153.8825 | 1.64E-32    | Madcam1      | 1.25757  | 16.01634 | 0.008102927 |
| Gbp2           | 3.349986 | 167.884  | 1.16E-35    | RT1-CE5        | 3.082781 | 973.9029 | 5.15E-210 | Gbp2          | 1.964914 | 115.1189 | 8.22E-24    | Wars          | 2.513657 | 148.9624 | 1.85E-31    | Gzmm         | 1.116297 | 24.53619 | 0.000244954 |
| RT1-A1         | 3.168814 | 418.0247 | 1.96E-89    | Cd74           | 2.974004 | 69.67511 | 5.50E-15  | Gbp5          | 1.9259   | 76.86094 | 8.95E-16    | Gbp5          | 2.391358 | 97.48511 | 1.52E-20    | Gzmk         | 1.092865 | 24.2678  | 0.000273961 |
| Wars           | 2.958814 | 152.2905 | 2.33E-32    | RT1-A1         | 2.838711 | 544.1026 | 7.36E-117 | Sod2          | 1.594173 | 95.29326 | 1.18E-19    | LOC100911498  | 2.17703  | 307.8055 | 9.86E-66    | Sst          | 1.054782 | 15.55665 | 0.009399989 |
| RT1-CE5        | 2.853823 | 580.6867 | 1.59E-124   | Wars           | 2.753502 | 213.7137 | 1.04E-45  | RT1-Da        | 1.549089 | 29.25168 | 6.01E-06    | Cd74          | 1.925577 | 15.89072 | 0.001596087 | Nkg7         | 1.053921 | 25.08605 | 0.000200559 |
| Tap1           | 2.822743 | 219.7752 | 8.63E-47    | Gbp5           | 2.417276 | 133.6068 | 1.56E-28  | Il18bp        | 1.489162 | 73.69259 | 4.13E-15    | Sod2          | 1.917323 | 96.82534 | 2.02E-20    | Gzma         | 0.871111 | 16.69116 | 0.006184576 |
| Gbp5           | 2.78567  | 110.0032 | 3.16E-23    | Gbp2           | 2.249539 | 150.9326 | 3.15E-32  | Neur13        | 1.474785 | 50.85712 | 2.02E-10    | Il18bp        | 1.894483 | 96.16443 | 2.76E-20    | Ap1n         | 0.835149 | 16.00334 | 0.008102927 |
| Gcg            | 2.538599 | 108.7688 | 5.31E-23    | Tap1           | 1.98829  | 192.3138 | 3.91E-41  | RT1-Db1       | 1.40846  | 29.10371 | 6.39E-06    | Neur13        | 1.863542 | 73.64966 | 1.65E-15    | Cc14         | 0.752094 | 16.27632 | 0.00735513  |
| Il18bp         | 2.376149 | 116.916  | 1.15E-24    | Neur13         | 1.956764 | 108.085  | 4.13E-23  | Vcam1         | 1.362668 | 41.74698 | 1.63E-08    | Tap1          | 1.808528 | 145.3928 | 1.01E-30    | Cd3g         | 0.6963   | 18.20483 | 0.003156245 |
| Psmb8          | 2.297101 | 283.5205 | 1.70E-60    | Il18bp         | 1.941059 | 125.6106 | 7.73E-27  | Ifit3         | 1.312148 | 64.38318 | 3.38E-13    | Ifi47         | 1.707248 | 84.79464 | 7.36E-18    | Serpinb6b    | 0.658528 | 21.92969 | 0.000727639 |
| Psmb9          | 2.206389 | 198.3293 | 3.61E-42    | Irf1           | 1.910085 | 157.8604 | 1.01E-33  | RT1-A1        | 1.280839 | 172.9233 | 1.04E-35    | Vcam1         | 1.638022 | 66.29253 | 5.69E-14    | Cemp2        | 0.6467   | 20.59902 | 0.001259833 |
| Cd74           | 2.165149 | 41.1376  | 0.0002928   | RT1-A2         | 1.898935 | 391.63   | 7.43E-84  | Isg15         | 1.277241 | 67.8736  | 6.65E-14    | Tgm2          | 1.602495 | 101.7355 | 2.12E-21    | Ptprcap      | 0.626882 | 20.47149 | 0.001306933 |
| Ifi47          | 2.063461 | 95.90624 | 3.06E-20    | RT1-CE14       | 1.846794 | 183.7527 | 2.63E-39  | Tap1          | 1.256324 | 84.63919 | 1.99E-17    | Irf1          | 1.556674 | 98.36391 | 1.05E-20    | Limd2        | 0.621064 | 15.53692 | 0.009405311 |
| RT1-A2         | 2.062473 | 307.1132 | 1.58E-65    | Cx3c1          | 1.793182 | 117.7257 | 3.68E-25  | Tgm2          | 1.251914 | 78.40921 | 4.26E-16    | Gzmm          | 1.482942 | 68.27809 | 5.60E-06    | Depp1        | 0.615466 | 18.62985 | 0.002741704 |
| RT1-CE10       | 2.056129 | 130.8816 | 2.79E-66    | RT1-CE10       | 1.697216 | 339.0951 | 1.53E-72  | Ifi47         | 1.251778 | 60.30564 | 2.25E-12    | Cx3c1         | 1.449853 | 66.16869 | 5.99E-14    | Apoe         | 0.615159 | 17.32222 | 0.004709546 |
| Sod2           | 2.019355 | 77.86696 | 1.91E-16    | Upp1           | 1.634078 | 116.788  | 5.75E-25  | Zbed5         | 1.120174 | 133.857  | 1.02E-27    | RT1-A1        | 1.374492 | 160.2741 | 6.96E-34    | Gbp2         | 0.61009  | 15.09348 | 0.011350494 |
| Irf1           | 2.004065 | 110.7643 | 2.21E-23    | Sod2           | 1.594537 | 86.27786 | 1.70E-18  | Ifitm1        | 1.100702 | 28.34746 | 9.30E-06    | Cd39a1        | 1.353816 | 93.05643 | 1.27E-19    | Cd8a         | 0.575362 | 12.18502 | 0.03353229  |
| Neur13         | 1.945175 | 66.77261 | 4.4E-14     | Psmb9          | 1.571172 | 177.4387 | 6.12E-38  | Upp1          | 1.085336 | 62.06316 | 9.90E-13    | Sic27a        | 1.323686 | 55.10635 | 1.36E-11    | Fbl          | 0.574229 | 17.96057 | 0.003541683 |
| Lap3           | 1.944943 | 171.8066 | 1.70E-36    | RT1-Da         | 1.564923 | 31.534   | 5.56E-07  | Cd34          | 1.079402 | 86.04512 | 1.02E-17    | Cc14          | 1.305433 | 24.92931 | 2.44E-05    | Sic39a1      | 0.557762 | 16.34911 | 0.00724386  |
| Parp14         | 1.852215 | 91.36243 | 2.64E-19    | Vcam1          | 1.56449  | 70.33551 | 4.01E-15  | Apol9a        | 1.076007 | 57.84835 | 6.91E-12    | Parp14        | 1.305294 | 66.12601 | 6.05E-14    | Rn28s        | 0.549747 | 50.40413 | 1.33E-09    |
| Zbed5          | 1.80695  | 183.0494 | 6.57E-39    | Tgm2           | 1.558222 | 110.7347 | 1.11E-23  | Irf1          | 1.06973  | 57.11688 | 9.64E-12    | Cd34          | 1.278505 | 97.55163 | 1.50E-20    | Tap1         | 0.54965  | 15.68712 | 0.008947022 |
| Chga           | 1.778524 | 22.672   | 6.51E-05    | Lap3           | 1.53303  | 176.9564 | 7.98E-38  | Sp110         | 1.059095 | 59.35179 | 3.35E-12    | Tapbp         | 1.274603 | 109.0976 | 6.19E-23    | Hmnpb2       | 0.535148 | 14.95191 | 0.012123504 |
| MGC108823      | 1.75285  | 83.39023 | 1.27E-17    | RT1-Db1        | 1.525235 | 41.92338 | 3.87E-09  | Manf          | 1.053565 | 57.11963 | 9.64E-12    | Igfbp3        | 1.255068 | 21.56028 | 0.000120485 | Rn18s        | 0.534152 | 43.04588 | 4.04E-08    |
| Igtp           | 1.732718 | 83.7074  | 1.10E-17    | Gzmm           | 1.519012 | 27.94117 | 3.03E-06  | Parp14        | 1.051241 | 50.46711 | 2.42E-10    | Upp1          | 1.250184 | 66.09144 | 6.08E-14    | Cd2          | 0.526436 | 22.21266 | 0.000655813 |
| Cd274          | 1.690627 | 69.42332 | 1.23E-14    | Cd34           | 1.485508 | 140.2437 | 5.86E-30  | Pheta2        | 1.026635 | 58.46484 | 5.15E-12    | Pdgfra        | 1.219768 | 50.76542 | 1.14E-10    | Tuba1b       | 0.518123 | 12.56303 | 0.02927077  |
| Upp1           | 1.679649 | 81.58548 | 3.08E-17    | Psmb8          | 1.477303 | 212.0544 | 2.29E-45  | Cx3c1         | 1.018345 | 40.89376 | 2.42E-08    | Fgl2          | 1.18748  | 33.72264 | 4.02E-07    | Chst1        | 0.515418 | 17.51716 | 0.004722235 |
| LOC360231      | 1.674178 | 122.2351 | 8.16E-26    | Fgl2           | 1.464472 | 56.69052 | 3.05E-12  | Cd274         | 1.013128 | 39.71229 | 4.33E-08    | Serping1      | 1.153368 | 35.58265 | 1.67E-07    | Ppp1r12a     | 0.515358 | 17.53685 | 0.004313206 |
| B2m            | 1.632164 | 566.5384 | 1.26E-121   | Zbed5          | 1.433214 | 173.4557 | 4.29E-37  | RT1-CE5       | 1.00531  | 187.5315 | 1.34E-38    | Lap3          | 1.15022  | 98.48999 | 1.01E-20    | Fos          | 0.513651 | 25.62015 | 0.000157074 |
| RT1-CE14       | 1.59725  | 96.10339 | 2.38E-20    | Ifi47          | 1.419692 | 75.45206 | 3.41E-16  | LOC100910973  | 0.97727  | 136.7379 | 3.36E-28    | Cdkn1a        | 1.147432 | 39.32163 | 2.84E-08    | Slk          | 0.509034 | 16.03786 | 0.008102927 |
| Manf           | 1.575837 | 72.6117  | 2.62E-15    | Cc14           | 1.409751 | 30.24881 | 1.02E-06  | Rtnau1ap      | 0.972107 | 56.00865 | 1.63E-11    | MGC108823     | 1.142674 | 48.95103 | 2.63E-10    | Ttcl4        | 0.507573 | 13.6725  | 0.019637632 |
| Ifit3          | 1.572253 | 57.56565 | 3.82E-12    | Depp1          | 1.398301 | 91.70332 | 1.22E-19  | Pdgfra        | 0.919112 | 36.83088 | 1.73E-07    | LOC100910973  | 1.125822 | 161.8393 | 3.59E-34    | Rn45s        | 0.504804 | 53.59205 | 2.98E-10    |
| Resp18         | 1.560897 | 20.22473 | 0.000201918 | B2m            | 1.33023  | 598.35   | 1.55E-128 | RT1-Ba        | 0.913544 | 22.61389 | 0.000129945 | Manf          | 1.104814 | 50.23111 | 1.45E-10    | Mettl6       | 0.5033   | 13.40937 | 0.021277656 |
| Sic38a5        | 1.559602 | 15.30746 | 0.001841763 | Ier2           | 1.310173 | 291.8851 | 1.57E-62  | Fbxo27        | 0.911468 | 40.09589 | 3.60E-08    | Timp1         | 1.09423  | 30.98457 | 1.42E-06    | Acad9        | 0.498545 | 13.92356 | 0.017986574 |
| Psmb10         | 1.556591 | 115.0412 | 2.79E-24    | Pla2g16        | 1.300077 | 66.0347  | 3.14E-14  | Igfbp3        | 0.909795 | 13.26353 | 0.008403648 | Nkg7          | 1.07514  | 24.17777 | 3.46E-05    | Exoc3        | 0.497986 | 13.26301 | 0.02211647  |
| Isg15          | 1.521259 | 59.50733 | 1.55E-12    | Vwa1           | 1.240859 | 217.2821 | 1.88E-46  | Cdkn1a        | 0.878664 | 29.54    | 5.26E-06    | Ifit3         | 1.052474 | 32.97094 | 5.73E-07    | Irf1         | 0.497529 | 13.71107 | 0.019529874 |
| Vcam1          | 1.517434 | 38.53965 | 3.64E-08    | Cd274          | 1.226486 | 57.29333 | 2.28E-12  | Litaf         | 0.872769 | 31.82878 | 1.87E-06    | Igtp          | 1.034461 | 41.89264 | 7.88E-09    | Sico2a1      | 0.497522 | 11.61477 | 0.042309102 |
| LOC100910973   | 1.514283 | 205.7856 | 9.08E-44    | Tubb5          | 1.218505 | 130.9642 | 5.80E-28  | Irf7          | 0.862516 | 27.19798 | 1.56E-05    | Litaf         | 1.02994  | 36.83561 | 9.19E-08    | Ppm1g        | 0.497064 | 15.76418 | 0.008763436 |
| Cd34           | 1.479212 | 94.35522 | 6.29E-20    | LOC360231      | 1.203805 | 103.405  | 4.11E-22  | Fgl2          | 0.854876 | 21.12551 | 0.000257976 | RT1-CE5       | 1.028264 | 161.3984 | 4.20E-34    | Myf6         | 0.495333 | 41.42294 | 8.72E-08    |
| Tapbp          | 1.477726 | 109.4133 | 4.14E-23    | Ifitm1         | 1.186378 | 31.64424 | 5.29E-07  | Hspa1a        | 0.836432 | 19.20789 | 0.000618623 | Isg15         | 1.021813 | 35.92114 | 1.42E-07    | Adarb1       | 0.4938   | 14.67165 | 0.013087454 |
| Sg5            | 1.470831 | 14.29506 | 0.002869441 | Lmcd1          | 1.180137 | 119.1124 | 1.86E-25  | Tapbp         | 0.826307 | 64.50918 | 3.26E-13    | Sic38a5       | 1.021123 | 9.334941 | 0.028365304 | R3hdm4       | 0.490718 | 12.4318  | 0.030690228 |
| Gzmm           | 1.450307 | 14.15364 | 0.003032735 | RT1-T24-4      | 1.168907 | 142.5306 | 1.93E-30  | Gbp4          | 0.825282 | 35.02582 | 4.01E-07    | Fbxo27        | 1.016015 | 42.24763 | 6.66E-09    | Lasp1        | 0.489304 | 13.27281 | 0.02211647  |
| Psm2           | 1.444775 | 106.8064 | 1.36E-22    | Il4r           | 1.143183 | 64.64733 | 6.20E-14  | Prss1         | 0.803928 | 18.18526 | 0.000960688 | Psmb10        | 1.015946 | 75.62132 | 6.25E-16    | Ilf3         | 0.483039 | 13.85073 | 0.018405969 |
| RGD1309362     | 1.444623 | 59.63445 | 1.47E-12    | Ddit4          | 1.138274 | 66.10112 | 3.05E-14  | Pla2g16       | 0.802842 | 21.05343 | 0.000264609 | Ifitm1        | 1.012851 | 17.20919 | 0.00088383  | Atxn3        | 0.482464 | 14.41693 | 0.014518278 |
| Cc14           | 1.399347 | 20.3262  | 0.000192434 | Gimap1         | 1.13319  | 89.20611 | 4.09E-19  | Lap3          | 0.802087 | 61.08825 | 1.55E-12    | Tnfrsf11a     | 0.965348 | 37.47806 | 6.81E-08    | Rhob         | 0.481943 | 23.66843 | 0.000345966 |
| Sg3            | 1.315441 | 12.86118 | 0.005474391 | Fam110d        | 1.128199 | 88.57383 | 5.55E-19  | Sic39a1       | 0.792619 | 43.07028 | 8.83E-09    | Psm2          | 0.964437 | 68.24886 | 2.25E-14    | Ebp          | 0.478915 | 11.6193  | 0.042309102 |
| Fgl2           | 1.312836 | 32.      |             |                |          |          |           |               |          |          |             |               |          |          |             |              |          |          |             |
